# Supplementary material for: SWELL1 regulates skeletal muscle cell size, intracellular signaling, adiposity and glucose metabolism
Source: eLife. 2020 Sep 15;9:e58941. doi: 10.7554/eLife.58941 (PMC7541086; doi:10.7554/eLife.58941)
Supplement: Supplementary file 1. [file elife-58941-supp1.xlsx]

## Sheet: WT_vs_KO.gene_exp_SIG
	Supplementary Table 1: RNA sequencing data of WT and Lrrc8a KO C2C12 myotube
Gene name	RPKM WT	RPKM KO	log2 (fold_change)	t_Value	p_value	q_value	significant	Fold Change
Aaas	17.1557	13.5894	-0.336208	-1.51868	0.00825	0.014734	yes	0.792121
Aaed1	24.013	36.7037	0.61211	2.72794	5e-05	0.000124353	yes	1.52849
Aagab	36.1495	27.2379	-0.408359	-2.14594	0.00025	0.000572921	yes	0.75348
Aamdc	64.0041	13.2241	-2.275	-9.1631	5e-05	0.000124353	yes	0.206613
Aar2	24.18	11.6937	-1.04808	-5.29069	5e-05	0.000124353	yes	0.483611
Aars	105.361	219.022	1.05574	5.25528	5e-05	0.000124353	yes	2.07878
Aars2	9.40771	7.37562	-0.351081	-1.60694	0.0054	0.00997901	yes	0.783996
Aasdh	4.98697	6.72216	0.430762	1.86527	0.0015	0.00305922	yes	1.34795
Aatf	19.796	32.7501	0.726292	3.5588	5e-05	0.000124353	yes	1.65438
Abat	0.178849	0.703624	1.97606	3.33562	5e-05	0.000124353	yes	3.93417
Abca2	23.3519	8.52211	-1.45426	-7.67029	5e-05	0.000124353	yes	0.364942
Abca3	5.78508	10.3414	0.838028	4.11941	5e-05	0.000124353	yes	1.78761
Abca4	0.725263	0.491728	-0.560643	-1.54907	0.00735	0.0132681	yes	0.678
Abca5	13.1363	6.06904	-1.11402	-5.78552	5e-05	0.000124353	yes	0.462005
Abca8a	0.69045	0.259583	-1.41134	-3.07387	5e-05	0.000124353	yes	0.375962
Abca8b	4.67653	7.94966	0.765455	3.68192	5e-05	0.000124353	yes	1.69991
Abcb1a	0.0552457	5.31229	6.58733	8.50332	5e-05	0.000124353	yes	96.1577
Abcb1b	1.56126	5.94439	1.92881	7.10354	5e-05	0.000124353	yes	3.80741
Abcb6	35.3204	15.1463	-1.22153	-6.26548	5e-05	0.000124353	yes	0.428828
Abcb7	8.27005	5.42839	-0.607371	-2.94867	5e-05	0.000124353	yes	0.656392
Abcb8	14.7247	18.319	0.315097	1.57735	0.00555	0.0102303	yes	1.2441
Abcc4	1.55725	8.14973	2.38776	9.70797	5e-05	0.000124353	yes	5.23344
Abcc8	0.762636	0.0242553	-4.97462	-3.95365	0.0032	0.00615954	yes	0.0318046
Abcd1	11.0988	7.25112	-0.614127	-2.85236	5e-05	0.000124353	yes	0.653325
Abcd2	1.61831	1.04264	-0.634241	-2.04497	0.00055	0.00119777	yes	0.64428
Abcd4	18.1279	12.6721	-0.516557	-2.49012	5e-05	0.000124353	yes	0.699038
Abcf1	92.9229	70.3438	-0.40161	-2.14434	0.0001	0.000241206	yes	0.757013
Abcf3	29.3626	24.9018	-0.237728	-1.2568	0.027	0.0436265	yes	0.84808
Abcg1	0.787846	0	#NAME?	#NAME?	5e-05	0.000124353	yes	#NAME?
Abcg2	28.441	13.008	-1.12857	-5.56784	5e-05	0.000124353	yes	0.457369
Abhd1	20.8427	3.60497	-2.53148	-2.92519	0.0001	0.000241206	yes	0.172961
Abhd10	8.07217	13.1114	0.699798	2.23758	0.00015	0.000354026	yes	1.62428
Abhd11	22.8115	32.3538	0.504175	2.23388	5e-05	0.000124353	yes	1.41831
Abhd12	52.63	110.428	1.06915	5.71355	5e-05	0.000124353	yes	2.0982
Abhd13	11.8178	14.6076	0.305757	1.58805	0.00625	0.0114103	yes	1.23607
Abhd14b	4.92714	8.68179	0.817243	2.77777	5e-05	0.000124353	yes	1.76204
Abhd15	1.23325	0.132313	-3.22044	-4.87002	5e-05	0.000124353	yes	0.107288
Abhd16a	28.9758	21.0179	-0.463232	-2.29978	0.00015	0.000354026	yes	0.725359
Abhd2	17.7742	31.5805	0.829249	4.28735	5e-05	0.000124353	yes	1.77676
Abhd5	15.2288	21.6101	0.504899	2.58078	5e-05	0.000124353	yes	1.41902
Abhd6	12.8985	18.0514	0.484907	2.21522	0.00015	0.000354026	yes	1.3995
Abhd8	50.1565	29.1669	-0.782107	-4.04188	5e-05	0.000124353	yes	0.581517
Abi3	50.9899	129.468	1.34431	6.58869	5e-05	0.000124353	yes	2.53909
Abl2	11.8927	14.5526	0.2912	1.55882	0.00685	0.0124343	yes	1.22366
Ablim1	75.4439	6.12931	-3.62161	-18.1176	5e-05	0.000124353	yes	0.0812432
Ablim2	11.3353	0.0859919	-7.0424	-7.17252	5e-05	0.000124353	yes	0.00758624
Ablim3	21.6498	0.223964	-6.59495	-13.9627	5e-05	0.000124353	yes	0.0103448
Abr	45.3615	35.3902	-0.358119	-1.91865	0.0009	0.00190089	yes	0.780181
Abra	79.8619	2.37835	-5.06947	-16.9705	5e-05	0.000124353	yes	0.0297809
Abtb1	14.9904	11.4179	-0.392742	-1.73398	0.00305	0.00590013	yes	0.761681
Acaa1a	25.4303	18.1779	-0.484362	-2.31353	0.00015	0.000354026	yes	0.714813
Acaa2	87.129	66.0529	-0.399532	-2.12043	5e-05	0.000124353	yes	0.758104
Acacb	2.08886	1.29399	-0.69089	-2.70252	5e-05	0.000124353	yes	0.619472
Acad10	2.35369	5.9567	1.33959	5.09603	5e-05	0.000124353	yes	2.53079
Acad11	14.3045	8.77881	-0.704369	-3.37679	5e-05	0.000124353	yes	0.613711
Acad12	7.28973	5.10279	-0.51458	-2.01693	0.00065	0.001402	yes	0.699997
Acadl	121.145	45.2205	-1.42169	-7.56463	5e-05	0.000124353	yes	0.373275
Acadm	52.701	44.9625	-0.229109	-1.21493	0.03045	0.0486243	yes	0.853162
Acads	46.6885	39.4843	-0.24179	-1.26614	0.0258	0.0418786	yes	0.845695
Acadsb	29.6385	21.5301	-0.461116	-2.42835	5e-05	0.000124353	yes	0.726424
Acap2	13.608	23.3376	0.778209	2.34133	0.00025	0.000572921	yes	1.715
Acap3	8.54624	4.0028	-1.09428	-4.8591	5e-05	0.000124353	yes	0.46837
Acbd3	24.4527	29.427	0.267151	1.41609	0.014	0.0239641	yes	1.20343
Acbd5	23.7117	12.9941	-0.867744	-4.42336	5e-05	0.000124353	yes	0.548003
Acbd6	39.97	50.6163	0.340684	1.63857	0.00345	0.00659977	yes	1.26636
Accs	2.10579	3.45207	0.713098	2.5743	5e-05	0.000124353	yes	1.63932
Acd	16.6802	26.3211	0.65808	2.96698	5e-05	0.000124353	yes	1.57798
Ache	2.33039	0.0673736	-5.11225	-4.17726	5e-05	0.000124353	yes	0.0289108
Ackr3	18.0077	29.6906	0.721392	3.57012	5e-05	0.000124353	yes	1.64877
Acly	34.3533	67.0568	0.964937	5.15952	5e-05	0.000124353	yes	1.95198
Acot1	0.613588	0.0814793	-2.91276	-2.24799	0.00905	0.0160495	yes	0.132792
Acot11	3.13495	0.675137	-2.21519	-7.02132	5e-05	0.000124353	yes	0.215358
Acot2	10.4828	14.4144	0.459486	2.03576	0.0005	0.00109639	yes	1.37505
Acot7	17.9076	38.62	1.10878	5.23869	5e-05	0.000124353	yes	2.15663
Acot9	90.0313	47.6362	-0.918369	-4.84963	5e-05	0.000124353	yes	0.529107
Acox1	47.7547	31.6816	-0.591998	-3.00419	5e-05	0.000124353	yes	0.663423
Acox2	1.103	0.0718829	-3.93964	-3.40674	5e-05	0.000124353	yes	0.0651704
Acox3	23.7346	15.5681	-0.608401	-3.17216	5e-05	0.000124353	yes	0.655923
Acp1	11.6088	17.9333	0.62742	3.0853	5e-05	0.000124353	yes	1.5448
Acp2	18.3097	13.3253	-0.458436	-2.24054	5e-05	0.000124353	yes	0.727775
Acp6	20.6629	27.9277	0.434655	2.11912	0.00035	0.000785252	yes	1.35159
Acpp	5.19827	1.73072	-1.58666	-5.90304	5e-05	0.000124353	yes	0.332941
Acrbp	2.86178	4.52023	0.659481	1.76917	0.00195	0.0039	yes	1.57951
Acsbg1	0.090202	0.788871	3.12856	3.68479	0.00025	0.000572921	yes	8.74562
Acsf3	6.9357	9.82494	0.502407	2.07841	0.00055	0.00119777	yes	1.41658
Acsl1	18.5433	11.0649	-0.744907	-3.75968	5e-05	0.000124353	yes	0.596706
Acsl3	84.0133	35.1777	-1.25596	-6.59211	5e-05	0.000124353	yes	0.418715
Acsl5	20.4801	32.1126	0.648919	3.40625	5e-05	0.000124353	yes	1.56799
Acsl6	38.3819	0.267969	-7.16222	-12.48	5e-05	0.000124353	yes	0.00698163
Acss2	16.1962	5.37192	-1.59214	-7.00038	5e-05	0.000124353	yes	0.331679
Acta1	5016.29	126.346	-5.31117	-16.9161	5e-05	0.000124353	yes	0.0251871
Acta2	541.787	6.42364	-6.39819	-26.7186	5e-05	0.000124353	yes	0.0118564
Actc1	860.191	3.97701	-7.75683	-26.8185	5e-05	0.000124353	yes	0.0046234
Actg1	451.81	655.781	0.537498	2.53054	5e-05	0.000124353	yes	1.45145
Actl6a	23.6985	35.3362	0.576352	2.92722	5e-05	0.000124353	yes	1.49107
Actn2	72.589	0.30573	-7.89135	-16.5035	5e-05	0.000124353	yes	0.00421179
Actn3	434.262	3.43492	-6.98215	-27.633	5e-05	0.000124353	yes	0.00790976
Actr1a	76.9436	62.8848	-0.291092	-1.56456	0.00485	0.00903672	yes	0.817283
Actr1b	135.952	92.0884	-0.562008	-3.00556	5e-05	0.000124353	yes	0.677359
Actr3	101.744	140.382	0.464409	2.44143	5e-05	0.000124353	yes	1.37975
Actr3b	0.606593	1.64556	1.43977	2.72188	0.00015	0.000354026	yes	2.71278
Actr6	9.86414	18.9757	0.943884	4.07149	5e-05	0.000124353	yes	1.9237
Actr8	24.8073	20.9103	-0.246551	-1.23148	0.0301	0.0481212	yes	0.842909
Acvr1	20.2998	25.9822	0.356056	1.84376	0.0013	0.00267509	yes	1.27992
Acvr2a	10.1278	5.41029	-0.904545	-3.10624	5e-05	0.000124353	yes	0.534201
Acvr2b	0.476358	1.33908	1.49112	2.55997	0.0001	0.000241206	yes	2.81107
Acy3	2.1732	0.325321	-2.73988	-3.02071	5e-05	0.000124353	yes	0.149697
Acyp2	12.7487	5.95922	-1.09716	-3.02149	5e-05	0.000124353	yes	0.467436
Adam10	20.3299	30.8024	0.599441	3.19046	5e-05	0.000124353	yes	1.51513
Adam12	1.17283	0.314126	-1.90058	-5.13133	5e-05	0.000124353	yes	0.267836
Adam15	32.376	45.0352	0.47613	2.54506	5e-05	0.000124353	yes	1.39101
Adam19	38.4336	28.7426	-0.419181	-2.21796	0.0003	0.000679963	yes	0.747849
Adam1a	1.36456	2.28234	0.74208	2.18053	0.00015	0.000354026	yes	1.67259
Adam23	1.16305	0.403793	-1.52623	-3.06843	5e-05	0.000124353	yes	0.347183
Adam8	2.56221	14.4171	2.49232	9.69964	5e-05	0.000124353	yes	5.62682
Adam9	67.4347	32.3263	-1.06078	-5.64161	5e-05	0.000124353	yes	0.479373
Adamts1	23.99	10.3683	-1.21025	-6.28341	5e-05	0.000124353	yes	0.432194
Adamts10	1.93248	1.18344	-0.707472	-2.17642	5e-05	0.000124353	yes	0.612392
Adamts14	17.3148	14.4855	-0.257394	-1.35454	0.0177	0.0296707	yes	0.836598
Adamts15	2.18009	0.868206	-1.32828	-4.36954	5e-05	0.000124353	yes	0.398243
Adamts16	5.17543	0.401135	-3.68952	-9.89455	5e-05	0.000124353	yes	0.0775075
Adamts2	22.1349	4.89324	-2.17746	-10.5739	5e-05	0.000124353	yes	0.221065
Adamts4	23.82	1.15681	-4.36395	-15.0117	5e-05	0.000124353	yes	0.0485646
Adamts5	17.766	2.29065	-2.95529	-13.8779	5e-05	0.000124353	yes	0.128934
Adamts6	4.92128	8.11138	0.720915	3.35353	5e-05	0.000124353	yes	1.64823
Adamts7	20.7456	5.55611	-1.90065	-9.20463	5e-05	0.000124353	yes	0.267823
Adamtsl1	7.33769	1.94453	-1.9159	-8.43073	5e-05	0.000124353	yes	0.265007
Adamtsl2	3.7529	0	#NAME?	#NAME?	5e-05	0.000124353	yes	#NAME?
Adamtsl3	1.1625	0.0172069	-6.07811	-5.14429	0.00275	0.00536583	yes	0.0148015
Adamtsl4	5.87422	0.557517	-3.39731	-9.36875	5e-05	0.000124353	yes	0.0949091
Adap1	0.699041	0.0521361	-3.74502	-2.91955	0.0033	0.00633334	yes	0.0745825
Adar	6.07086	14.7458	1.28033	5.9815	5e-05	0.000124353	yes	2.42895
Adarb1	6.11268	8.57278	0.48796	2.44157	5e-05	0.000124353	yes	1.40246
Adat1	2.41605	4.81307	0.994308	3.58501	5e-05	0.000124353	yes	1.99212
Adat2	6.19459	10.5215	0.764254	1.60706	0.0072	0.0130296	yes	1.69849
Adck1	20.082	27.4827	0.45262	2.26732	0.0001	0.000241206	yes	1.36852
Adck3	96.3065	2.29094	-5.39362	-8.90228	5e-05	0.000124353	yes	0.023788
Adck4	12.3779	7.72831	-0.679547	-2.91752	5e-05	0.000124353	yes	0.624361
Adcy6	31.6602	26.3455	-0.265113	-1.41076	0.0129	0.0222223	yes	0.832134
Adcy7	63.7755	44.4952	-0.519355	-2.733	5e-05	0.000124353	yes	0.697684
Adcy9	8.72221	5.59292	-0.641092	-3.26592	5e-05	0.000124353	yes	0.641227
Add2	1.52764	38.34	4.64947	17.0662	5e-05	0.000124353	yes	25.0975
Add3	11.9589	25.2231	1.07667	5.56215	5e-05	0.000124353	yes	2.10916
Adgra1	0.312982	1.43862	2.20054	5.02923	5e-05	0.000124353	yes	4.59651
Adgra2	12.9589	30.7315	1.24577	6.52718	5e-05	0.000124353	yes	2.37145
Adgra3	14.3377	11.5462	-0.312388	-1.63111	0.0046	0.00860323	yes	0.805308
Adgre5	25.4371	8.46497	-1.58736	-4.54744	5e-05	0.000124353	yes	0.33278
Adgrf4	0.0518678	1.04397	4.3311	3.0936	5e-05	0.000124353	yes	20.1276
Adgrg1	5.05344	1.07468	-2.23336	-6.99163	5e-05	0.000124353	yes	0.212663
Adgrg2	0.588795	1.05702	0.844163	2.14921	0.00025	0.000572921	yes	1.79522
Adgrg3	1.04066	1.52681	0.553022	1.34128	0.0217	0.0357286	yes	1.46716
Adgrg6	8.67736	21.5525	1.31253	6.86854	5e-05	0.000124353	yes	2.48377
Adgrl1	10.7599	3.9492	-1.44603	-7.136	5e-05	0.000124353	yes	0.36703
Adgrl2	6.24387	10.5508	0.756833	3.79767	5e-05	0.000124353	yes	1.68978
Adgrl3	6.43748	1.07956	-2.57605	-9.59404	5e-05	0.000124353	yes	0.167699
Adh1	3.91778	15.0361	1.94032	6.43335	5e-05	0.000124353	yes	3.83791
Adh5	76.4742	96.7198	0.338838	1.81082	0.002	0.00399227	yes	1.26474
Adh7	19.4455	127.125	2.70874	13.7215	5e-05	0.000124353	yes	6.5375
Adipor2	43.1122	33.7959	-0.351246	-1.88521	0.00115	0.00238543	yes	0.783907
Adk	26.634	21.9553	-0.278699	-1.36477	0.01755	0.0294392	yes	0.824334
Adm	3.93764	0.351498	-3.48574	-5.25458	5e-05	0.000124353	yes	0.0892663
Adm2	2.73949	0.932566	-1.55463	-2.86508	5e-05	0.000124353	yes	0.340416
Adnp2	9.7705	15.7272	0.686757	3.46845	5e-05	0.000124353	yes	1.60966
Ado	16.6188	21.1525	0.348009	1.83333	0.0013	0.00267509	yes	1.2728
Adora1	81.4602	0.868396	-6.5516	-7.99495	5e-05	0.000124353	yes	0.0106604
Adora2b	16.0543	42.735	1.41246	6.8828	5e-05	0.000124353	yes	2.66191
Adpgk	9.13501	23.192	1.34415	6.29912	5e-05	0.000124353	yes	2.53881
Adprhl1	25.2716	0.203239	-6.9582	-8.92626	5e-05	0.000124353	yes	0.00804217
Adprhl2	10.323	17.2854	0.743695	3.02777	5e-05	0.000124353	yes	1.67446
Adrb2	21.063	5.22868	-2.0102	-8.48652	5e-05	0.000124353	yes	0.248239
Adrm1	155.771	97.0072	-0.683261	-3.66461	5e-05	0.000124353	yes	0.622756
Adss	22.2206	60.7131	1.45011	7.57909	5e-05	0.000124353	yes	2.73229
Adssl1	69.8443	16.5611	-2.07635	-10.2291	5e-05	0.000124353	yes	0.237114
Aebp1	312.228	201.664	-0.630646	-2.84403	5e-05	0.000124353	yes	0.645887
Aebp2	21.0294	36.2329	0.784891	4.07151	5e-05	0.000124353	yes	1.72296
Aen	24.7359	19.623	-0.334062	-1.69513	0.00355	0.00676809	yes	0.7933
Aes	662.538	446.906	-0.56803	-2.77808	5e-05	0.000124353	yes	0.674537
Afap1	10.2158	15.3422	0.586703	3.0909	5e-05	0.000124353	yes	1.50181
Afap1l1	19.1767	0.0582831	-8.36206	-9.45218	5e-05	0.000124353	yes	0.00303927
Afap1l2	11.9366	17.4386	0.546889	2.79342	5e-05	0.000124353	yes	1.46093
Aff1	14.1493	22.2151	0.65081	3.51419	5e-05	0.000124353	yes	1.57005
Aff4	34.5443	26.2674	-0.395173	-2.08675	0.00015	0.000354026	yes	0.760398
Afg3l2	48.7082	59.1668	0.280623	1.50816	0.00635	0.0115861	yes	1.21472
Afmid	3.43989	1.35572	-1.3433	-3.64825	5e-05	0.000124353	yes	0.394118
Aftph	17.2585	20.9703	0.281041	1.46381	0.0101	0.017729	yes	1.21507
Aga	41.8367	63.4173	0.600108	3.07973	5e-05	0.000124353	yes	1.51583
Agap1	9.61801	7.97233	-0.270737	-1.40629	0.01495	0.0254602	yes	0.828896
Agap2	1.00267	0.134815	-2.89479	-5.30969	5e-05	0.000124353	yes	0.134456
Agbl5	3.31066	5.79653	0.808073	1.56495	0.00875	0.0155642	yes	1.75087
Ager	0.522771	1.09329	1.06443	1.48495	0.0029	0.00563987	yes	2.09134
Agfg2	7.47801	13.2737	0.827842	3.74094	5e-05	0.000124353	yes	1.77503
Aggf1	21.01	16.5872	-0.341011	-1.7543	0.00285	0.00555134	yes	0.789488
Agk	9.81357	18.8934	0.945036	4.33475	5e-05	0.000124353	yes	1.92524
Agl	24.1729	11.2937	-1.09787	-5.86128	5e-05	0.000124353	yes	0.467206
Ago1	9.24471	13.0263	0.494726	2.59752	5e-05	0.000124353	yes	1.40905
Ago2	24.4265	16.9253	-0.529263	-2.82453	5e-05	0.000124353	yes	0.692909
Ago3	3.03476	2.33397	-0.378797	-1.63069	0.00485	0.00903672	yes	0.769079
Ago4	1.02522	0.0625037	-4.03585	-6.11532	5e-05	0.000124353	yes	0.0609661
Agpat1	55.8705	81.2814	0.540839	2.86251	5e-05	0.000124353	yes	1.45482
Agpat2	18.2089	14.1578	-0.363049	-1.60512	0.005	0.00930083	yes	0.77752
Agpat3	84.0271	36.9855	-1.1839	-6.31726	5e-05	0.000124353	yes	0.44016
Agpat4	24.4504	16.0105	-0.610841	-2.92999	5e-05	0.000124353	yes	0.654815
Agps	13.6944	11.4964	-0.252401	-1.33745	0.01835	0.0306608	yes	0.839498
Agrp	6.06488	0.243012	-4.64138	-3.9372	0.0007	0.00150227	yes	0.0400687
Agtpbp1	10.9132	8.66257	-0.333203	-1.60877	0.0056	0.0103178	yes	0.793772
Agtrap	10.5488	6.78314	-0.637059	-3.05484	5e-05	0.000124353	yes	0.643022
Ahctf1	11.8977	14.4565	0.281035	1.50272	0.00805	0.0143955	yes	1.21507
Ahdc1	13.2469	5.21988	-1.34357	-6.74383	5e-05	0.000124353	yes	0.394044
Ahi1	3.26054	6.6236	1.0225	4.44276	5e-05	0.000124353	yes	2.03144
Ahnak	100.511	46.2301	-1.12045	-2.61256	5e-05	0.000124353	yes	0.45995
Ahrr	0.27473	1.09961	2.0009	4.38294	5e-05	0.000124353	yes	4.0025
Ahsa1	145.642	192.954	0.405826	2.17882	5e-05	0.000124353	yes	1.32485
Ahsa2	44.6871	25.9403	-0.784664	-2.55661	5e-05	0.000124353	yes	0.580487
Aida	29.0275	23.471	-0.306544	-1.61838	0.00435	0.0081677	yes	0.808576
Aif1l	138.317	14.9286	-3.21183	-16.2833	5e-05	0.000124353	yes	0.10793
Aifm1	35.3016	45.6241	0.370061	1.95359	0.00065	0.001402	yes	1.29241
Aifm2	22.2254	31.55	0.505429	2.25702	0.00025	0.000572921	yes	1.41955
Aig1	3.65614	5.41886	0.567669	1.52438	0.0097	0.0170898	yes	1.48213
Aim1	2.63833	3.66333	0.473529	2.09285	0.0003	0.000679963	yes	1.3885
Aimp2	73.6373	40.1031	-0.876724	-2.51881	5e-05	0.000124353	yes	0.544603
Ak1	116.792	32.1345	-1.86175	-9.74157	5e-05	0.000124353	yes	0.275142
Ak2	34.4527	41.9957	0.285625	1.46157	0.0089	0.0158083	yes	1.21894
Ak6	16.9732	25.8796	0.608553	1.34987	0.0237	0.0386876	yes	1.52473
Akap1	37.1915	26.4076	-0.494022	-2.63904	5e-05	0.000124353	yes	0.710043
Akap10	9.57727	12.999	0.44071	2.17685	0.00025	0.000572921	yes	1.35727
Akap13	16.6297	7.67488	-1.11555	-5.94539	5e-05	0.000124353	yes	0.461515
Akap2	30.5259	73.3161	1.2641	5.33788	5e-05	0.000124353	yes	2.40177
Akap6	24.0442	1.70715	-3.81603	-17.6504	5e-05	0.000124353	yes	0.0710004
Akap7	4.99342	7.08985	0.505728	2.11248	0.00035	0.000785252	yes	1.41984
Akap8	20.6846	33.2266	0.683784	3.61108	5e-05	0.000124353	yes	1.60635
Akap9	7.46137	6.21066	-0.264694	-1.39503	0.0136	0.023331	yes	0.832375
Akip1	1.6372	0.104815	-3.96531	-1.54588	0.01785	0.0298818	yes	0.064021
Akirin1	113.567	51.2534	-1.14782	-6.11137	5e-05	0.000124353	yes	0.451307
Akna	1.38645	5.00551	1.85212	6.95479	5e-05	0.000124353	yes	3.6103
Akr1b7	6.12223	8.40093	0.456493	1.51457	0.01	0.0175659	yes	1.3722
Akr1c13	3.07174	10.9572	1.83475	5.47541	5e-05	0.000124353	yes	3.5671
Akr1e1	7.26039	14.8992	1.03712	4.18372	5e-05	0.000124353	yes	2.05213
Akt2	153.543	51.2899	-1.58189	-8.28434	5e-05	0.000124353	yes	0.334044
Akt3	18.2893	14.435	-0.341431	-1.78661	0.0018	0.00362044	yes	0.789258
Aktip	38.6873	20.8702	-0.890414	-2.82026	5e-05	0.000124353	yes	0.539459
Alad	12.138	20.6726	0.768185	3.99649	5e-05	0.000124353	yes	1.70313
Alas1	26.1476	18.7435	-0.480289	-2.4481	5e-05	0.000124353	yes	0.716834
Alcam	1.76912	15.1201	3.09536	12.6205	5e-05	0.000124353	yes	8.54666
Aldh16a1	7.85848	10.6763	0.442094	1.5244	0.00785	0.0140642	yes	1.35857
Aldh18a1	36.4629	77.7782	1.09294	5.79025	5e-05	0.000124353	yes	2.13308
Aldh1b1	1.47699	0	#NAME?	#NAME?	5e-05	0.000124353	yes	#NAME?
Aldh1l2	24.814	105.437	2.08715	10.643	5e-05	0.000124353	yes	4.24908
Aldh3a1	24.5789	91.9115	1.90283	9.619	5e-05	0.000124353	yes	3.73946
Aldh3a2	27.9474	42.2252	0.595391	3.17016	5e-05	0.000124353	yes	1.51088
Aldh3b1	98.6687	0.647769	-7.25097	-16.7305	5e-05	0.000124353	yes	0.00656509
Aldh3b3	0.760485	0	#NAME?	#NAME?	5e-05	0.000124353	yes	#NAME?
Aldh4a1	6.84833	5.32105	-0.364042	-1.55889	0.0058	0.0106642	yes	0.776985
Aldh5a1	1.0632	2.27032	1.09447	3.72377	5e-05	0.000124353	yes	2.13535
Aldh6a1	12.0303	9.69672	-0.311106	-1.40787	0.0146	0.0249052	yes	0.806024
Aldh9a1	8.4078	34.5515	2.03895	9.80871	5e-05	0.000124353	yes	4.10946
Aldoa	1789.25	1080.27	-0.727961	-2.98534	5e-05	0.000124353	yes	0.603757
Alg1	19.2904	26.2761	0.445872	1.64844	0.00475	0.00886505	yes	1.36214
Alg10b	28.6705	42.622	0.572029	3.06066	5e-05	0.000124353	yes	1.48661
Alg11	4.05293	8.38354	1.04859	4.81296	5e-05	0.000124353	yes	2.06851
Alg2	18.5728	27.4976	0.566111	2.93832	5e-05	0.000124353	yes	1.48053
Alg5	23.7909	30.3966	0.353499	1.70031	0.0035	0.00668716	yes	1.27766
Alg8	6.5041	9.88688	0.604166	2.41549	5e-05	0.000124353	yes	1.5201
Alkbh2	3.7249	10.3603	1.47579	4.34696	5e-05	0.000124353	yes	2.78136
Alkbh3	38.0569	22.1147	-0.783155	-3.63957	5e-05	0.000124353	yes	0.581095
Alkbh5	49.3265	39.4369	-0.322816	-1.71812	0.00295	0.00572365	yes	0.799508
Alkbh6	16.5601	25.2391	0.607946	2.4725	5e-05	0.000124353	yes	1.52409
Alkbh7	15.5093	20.3046	0.388672	1.52876	0.00735	0.0132681	yes	1.30919
Alms1	1.44951	2.43736	0.749748	3.1653	5e-05	0.000124353	yes	1.6815
Alox5	39.6173	0.0437614	-9.82225	-7.95707	5e-05	0.000124353	yes	0.00110461
Alpk1	4.1622	1.41922	-1.55225	-5.61283	5e-05	0.000124353	yes	0.340978
Alpk2	4.9078	0.64407	-2.92979	-4.28713	5e-05	0.000124353	yes	0.131234
Alpk3	28.1418	0.37842	-6.21658	-18.4621	5e-05	0.000124353	yes	0.0134469
Als2	9.56485	7.3365	-0.382651	-1.89979	0.0009	0.00190089	yes	0.767027
Als2cl	4.64948	0.201502	-4.5282	-9.65941	5e-05	0.000124353	yes	0.0433387
Alyref	22.3252	33.9299	0.60388	2.74653	5e-05	0.000124353	yes	1.5198
Alyref2	4.61435	6.48851	0.491761	1.52619	0.0083	0.0148105	yes	1.40616
Amacr	33.9009	16.9916	-0.996501	-5.08737	5e-05	0.000124353	yes	0.501214
Amd2	39.3248	67.3256	0.775714	4.15637	5e-05	0.000124353	yes	1.71204
Amdhd2	14.6962	9.77982	-0.587563	-2.38116	5e-05	0.000124353	yes	0.665466
Amh	0.4611	0.992282	1.10567	1.79298	0.0036	0.00685288	yes	2.15199
Amigo1	13.3206	2.99116	-2.15488	-9.2513	5e-05	0.000124353	yes	0.224552
Ammecr1	22.6491	15.5544	-0.542131	-2.77208	5e-05	0.000124353	yes	0.686756
Ammecr1l	15.3191	20.0966	0.391626	2.07661	0.0004	0.000888268	yes	1.31187
Amot	24.626	7.90826	-1.63875	-8.50128	5e-05	0.000124353	yes	0.321135
Amotl1	94.4192	70.3036	-0.425482	-2.08072	0.0002	0.000464606	yes	0.74459
Amotl2	39.7301	12.1405	-1.71041	-8.90535	5e-05	0.000124353	yes	0.305573
Ampd3	41.9201	97.826	1.22258	6.29139	5e-05	0.000124353	yes	2.33364
Amz1	0.208758	1.07549	2.36509	3.81342	5e-05	0.000124353	yes	5.15185
Anapc1	23.2301	16.1874	-0.521126	-2.7991	5e-05	0.000124353	yes	0.696828
Anapc16	52.5981	69.3887	0.399691	1.75776	0.0023	0.00455081	yes	1.31923
Anapc2	56.4903	35.2871	-0.678862	-3.63461	5e-05	0.000124353	yes	0.624658
Anapc5	120.925	95.9159	-0.334271	-1.79242	0.00175	0.00352559	yes	0.793185
Anapc7	39.2926	30.5314	-0.363966	-1.92986	0.0007	0.00150227	yes	0.777026
Ang2	0.923121	0	#NAME?	#NAME?	5e-05	0.000124353	yes	#NAME?
Angel2	14.2216	19.9137	0.485677	2.45753	5e-05	0.000124353	yes	1.40024
Angpt1	31.5695	0.321015	-6.61975	-16.0709	5e-05	0.000124353	yes	0.0101685
Angpt4	26.1525	11.5272	-1.18191	-5.20854	5e-05	0.000124353	yes	0.440768
Angptl2	86.7604	112.941	0.380463	1.95502	0.0005	0.00109639	yes	1.30176
Angptl4	4.90636	6.56808	0.420818	1.50941	0.0092	0.0162899	yes	1.33869
Angptl6	4.17397	10.491	1.32966	3.81564	5e-05	0.000124353	yes	2.51343
Ank	119.016	57.9954	-1.03714	-5.43771	5e-05	0.000124353	yes	0.487293
Ank1	14.0613	1.30863	-3.42559	-14.0129	5e-05	0.000124353	yes	0.0930668
Ank2	5.31177	9.29507	0.807273	3.90922	5e-05	0.000124353	yes	1.7499
Ank3	5.98792	0.330245	-4.18044	-12.86	5e-05	0.000124353	yes	0.0551521
Ankib1	10.0061	13.015	0.379298	1.98244	0.0004	0.000888268	yes	1.30071
Ankmy2	5.88041	9.62586	0.710998	2.94572	5e-05	0.000124353	yes	1.63694
Ankrd1	1665.55	72.1588	-4.52868	-19.1863	5e-05	0.000124353	yes	0.0433243
Ankrd10	63.4088	24.6399	-1.36369	-7.06126	5e-05	0.000124353	yes	0.388587
Ankrd11	26.5412	32.0135	0.270443	1.45629	0.01115	0.0193909	yes	1.20618
Ankrd13b	21.4871	27.7277	0.367853	1.93391	0.0008	0.00170331	yes	1.29043
Ankrd13c	18.3456	28.0335	0.611718	3.13001	5e-05	0.000124353	yes	1.52808
Ankrd13d	2.03946	1.32004	-0.627606	-1.58519	0.0068	0.0123508	yes	0.64725
Ankrd2	165.507	4.7731	-5.11583	-17.7466	5e-05	0.000124353	yes	0.0288391
Ankrd23	240.867	6.16772	-5.28736	-22.2857	5e-05	0.000124353	yes	0.0256063
Ankrd24	2.34532	3.95245	0.752965	2.76163	5e-05	0.000124353	yes	1.68525
Ankrd26	2.70162	4.17241	0.627056	2.65784	5e-05	0.000124353	yes	1.54441
Ankrd28	11.2535	15.3832	0.450978	2.34677	5e-05	0.000124353	yes	1.36697
Ankrd32	10.8759	4.59899	-1.24174	-5.53746	5e-05	0.000124353	yes	0.422862
Ankrd33b	13.0306	2.3825	-2.45136	-8.76884	5e-05	0.000124353	yes	0.182838
Ankrd35	1.09694	0.096957	-3.5	-5.2036	5e-05	0.000124353	yes	0.0883883
Ankrd39	9.72729	4.75343	-1.03307	-3.79276	5e-05	0.000124353	yes	0.488669
Ankrd40	85.1189	51.4756	-0.72559	-3.61906	5e-05	0.000124353	yes	0.60475
Ankrd9	4.34949	2.1373	-1.02506	-3.33257	5e-05	0.000124353	yes	0.49139
Anks1	4.53481	5.51122	0.281331	1.308	0.02285	0.0373887	yes	1.21532
Anks3	14.8848	10.3226	-0.528041	-2.44401	5e-05	0.000124353	yes	0.693496
Anks6	1.05676	2.35753	1.15763	3.39294	5e-05	0.000124353	yes	2.23091
Ano6	31.7963	41.5807	0.387057	2.0784	0.00035	0.000785252	yes	1.30772
Anp32a	32.3438	45.217	0.483377	2.53268	5e-05	0.000124353	yes	1.39801
Anp32b	118.603	213.842	0.850411	4.53998	5e-05	0.000124353	yes	1.80301
Anpep	53.0569	539.146	3.34506	15.5647	5e-05	0.000124353	yes	10.1616
Antxr1	9.79807	15.2074	0.634203	3.27421	5e-05	0.000124353	yes	1.55208
Antxr2	29.1322	69.3539	1.25136	6.63542	5e-05	0.000124353	yes	2.38066
Anxa1	225.845	389.044	0.7846	4.09094	5e-05	0.000124353	yes	1.72261
Anxa11	109.571	27.714	-1.98318	-10.4266	5e-05	0.000124353	yes	0.252932
Anxa3	260.315	100.975	-1.36626	-7.21553	5e-05	0.000124353	yes	0.387896
Anxa5	92.4781	180.265	0.962933	5.14113	5e-05	0.000124353	yes	1.94927
Anxa6	351.693	76.5575	-2.1997	-10.7632	5e-05	0.000124353	yes	0.217683
Anxa8	64.3314	42.3089	-0.604562	-3.14117	5e-05	0.000124353	yes	0.657671
Aoc2	2.21012	5.31202	1.26513	4.21489	5e-05	0.000124353	yes	2.40349
Aox1	5.26737	6.69191	0.345334	1.55987	0.0075	0.0135074	yes	1.27045
Ap1g1	17.0262	23.4124	0.459518	2.45668	5e-05	0.000124353	yes	1.37508
Ap1m1	36.6165	43.3954	0.245049	1.2848	0.02415	0.0393704	yes	1.18513
Ap1s1	49.6121	78.4208	0.660545	3.43637	5e-05	0.000124353	yes	1.58068
Ap1s2	20.1088	7.15923	-1.48995	-6.65624	5e-05	0.000124353	yes	0.356025
Ap1s3	0.743527	2.71409	1.86801	4.78222	5e-05	0.000124353	yes	3.65029
Ap2a1	63.1413	42.2332	-0.580205	-2.98561	5e-05	0.000124353	yes	0.668869
Ap2a2	44.2004	31.7382	-0.477838	-2.55442	5e-05	0.000124353	yes	0.718053
Ap2b1	40.7148	50.6231	0.314242	1.67562	0.0026	0.005094	yes	1.24336
Ap2s1	100.421	82.4668	-0.284176	-1.45899	0.0118	0.0204439	yes	0.821211
Ap3d1	42.4322	58.4816	0.462823	2.47379	5e-05	0.000124353	yes	1.37824
Ap3m2	4.2463	2.57416	-0.722102	-2.62631	5e-05	0.000124353	yes	0.606214
Ap3s1	47.1677	59.3369	0.331132	1.73103	0.00275	0.00536583	yes	1.258
Ap3s2	13.3109	9.44859	-0.494438	-2.56264	5e-05	0.000124353	yes	0.709838
Ap4e1	7.90282	4.84478	-0.705936	-3.44395	5e-05	0.000124353	yes	0.613045
Ap5b1	2.84964	3.92792	0.462986	1.66483	0.0039	0.00738427	yes	1.37839
Ap5z1	6.82429	8.35082	0.29124	1.34452	0.0196	0.0325477	yes	1.22369
Apaf1	4.39296	8.21888	0.903749	4.41727	5e-05	0.000124353	yes	1.87092
Apba1	0.413935	0.888481	1.10194	2.90726	5e-05	0.000124353	yes	2.14643
Apba3	38.0596	46.6053	0.292233	1.53748	0.00705	0.0127693	yes	1.22453
Apbb1	33.3816	9.74825	-1.77584	-8.55917	5e-05	0.000124353	yes	0.292024
Apbb2	18.8312	14.3643	-0.390639	-2.07691	0.00015	0.000354026	yes	0.762792
Apbb3	10.1909	19.0166	0.899981	1.85859	0.00145	0.0029675	yes	1.86604
Apc	15.0158	8.69707	-0.787882	-4.20367	5e-05	0.000124353	yes	0.579194
Apcdd1	6.67047	69.4207	3.37951	15.7844	5e-05	0.000124353	yes	10.4072
Apeh	27.8058	17.5481	-0.664068	-3.34733	5e-05	0.000124353	yes	0.631096
Apex2	3.51362	5.06351	0.527178	1.73628	0.00255	0.00500078	yes	1.44111
Aph1a	40.2911	49.0577	0.284018	1.50805	0.00895	0.0158903	yes	1.21758
Aph1b	4.30535	3.33073	-0.370292	-1.53173	0.00665	0.0120996	yes	0.773626
Api5	36.0217	48.1246	0.417906	2.2479	5e-05	0.000124353	yes	1.33599
Apip	15.8892	11.4536	-0.472248	-1.71288	0.00295	0.00572365	yes	0.720841
Aplf	5.23762	3.46006	-0.598114	-2.31507	0.0003	0.000679963	yes	0.660617
Apoa1bp	75.9673	101.613	0.419631	2.17895	0.0001	0.000241206	yes	1.33759
Apobec2	83.1472	0.617252	-7.07366	-13.3738	5e-05	0.000124353	yes	0.00742363
Apobec3	4.00056	5.16064	0.36735	1.34689	0.0175	0.0293632	yes	1.28998
Apobr	1.99546	7.65187	1.93909	7.1379	5e-05	0.000124353	yes	3.83464
Apoc1	0.699821	0	#NAME?	#NAME?	5e-05	0.000124353	yes	#NAME?
Apod	2.47569	1.49645	-0.726283	-1.86811	0.0009	0.00190089	yes	0.604459
Apoe	26.6211	6.36529	-2.06427	-7.74489	5e-05	0.000124353	yes	0.239107
Apol8	1.85398	0.56149	-1.72329	-3.33179	5e-05	0.000124353	yes	0.302857
Apool	40.1959	14.6376	-1.45737	-6.07317	5e-05	0.000124353	yes	0.364156
Apopt1	29.165	23.8641	-0.289401	-1.24576	0.03045	0.0486243	yes	0.818242
App	325.138	181.744	-0.839148	-4.0506	5e-05	0.000124353	yes	0.558974
Appl2	26.3935	31.0546	0.234628	1.23524	0.0294	0.0471114	yes	1.1766
Aprt	68.6609	195.317	1.50826	7.82941	5e-05	0.000124353	yes	2.84467
Aptx	5.30421	4.38078	-0.275948	-1.25463	0.02895	0.0464624	yes	0.825907
Aqp1	7.06016	1.28194	-2.46137	-7.64563	5e-05	0.000124353	yes	0.181574
Aqp5	153.686	74.525	-1.04419	-5.27521	5e-05	0.000124353	yes	0.484917
Aqr	24.3624	15.0632	-0.693633	-3.65702	5e-05	0.000124353	yes	0.618295
Araf	75.4212	46.0908	-0.710492	-2.59665	5e-05	0.000124353	yes	0.611112
Arap1	6.4146	4.46389	-0.523056	-2.31637	5e-05	0.000124353	yes	0.695896
Areg	0.382739	4.34679	3.50552	5.40666	5e-05	0.000124353	yes	11.3571
Arel1	19.0905	15.3357	-0.315966	-1.67588	0.00285	0.00555134	yes	0.803313
Arf2	21.2844	9.70461	-1.13305	-5.23695	5e-05	0.000124353	yes	0.455951
Arf3	59.921	107.343	0.841091	4.45895	5e-05	0.000124353	yes	1.7914
Arf4	88.6714	113.677	0.358402	1.92235	0.0008	0.00170331	yes	1.28201
Arf5	130.773	79.0122	-0.726913	-3.81474	5e-05	0.000124353	yes	0.604195
Arf6	20.9321	34.0139	0.700409	3.71554	5e-05	0.000124353	yes	1.62497
Arfgap1	38.3855	22.3995	-0.777093	-4.04276	5e-05	0.000124353	yes	0.583541
Arfgap2	48.9026	24.8903	-0.974329	-5.19561	5e-05	0.000124353	yes	0.508977
Arfgap3	68.707	23.4358	-1.55174	-8.13336	5e-05	0.000124353	yes	0.341098
Arfip2	14.1979	21.1334	0.573845	2.91817	5e-05	0.000124353	yes	1.48849
Arglu1	27.3128	33.5173	0.295327	1.48212	0.00945	0.0166944	yes	1.22716
Arhgap1	16.0077	20.1643	0.333035	1.689	0.0034	0.00651316	yes	1.25966
Arhgap11a	1.93617	1.4842	-0.383519	-1.30801	0.02625	0.0425422	yes	0.766566
Arhgap12	15.553	20.7975	0.419212	2.20157	0.0002	0.000464606	yes	1.3372
Arhgap17	10.6332	12.8902	0.277701	1.35095	0.0171	0.0287934	yes	1.21226
Arhgap18	8.14888	16.6027	1.02675	4.98581	5e-05	0.000124353	yes	2.03743
Arhgap21	15.4564	11.2113	-0.463254	-2.46165	5e-05	0.000124353	yes	0.725348
Arhgap22	18.3884	42.665	1.21426	6.26905	5e-05	0.000124353	yes	2.32022
Arhgap23	17.3818	7.56119	-1.20089	-6.09337	5e-05	0.000124353	yes	0.435007
Arhgap24	13.6883	9.40674	-0.541174	-2.57948	5e-05	0.000124353	yes	0.687211
Arhgap26	0.995268	4.14599	2.05856	7.97782	5e-05	0.000124353	yes	4.1657
Arhgap32	1.39619	2.6488	0.923848	3.95437	5e-05	0.000124353	yes	1.89717
Arhgap33	1.98134	29.8137	3.91143	15.8813	5e-05	0.000124353	yes	15.0473
Arhgap4	0.532969	1.45171	1.44563	3.23729	5e-05	0.000124353	yes	2.72382
Arhgap5	24.7533	29.1876	0.237734	1.27534	0.0227	0.0371825	yes	1.17914
Arhgdia	208.664	272.002	0.382434	1.90869	0.0009	0.00190089	yes	1.30354
Arhgdib	28.401	65.9027	1.2144	5.90487	5e-05	0.000124353	yes	2.32044
Arhgdig	7.03694	2.48602	-1.50111	-3.81003	5e-05	0.000124353	yes	0.353281
Arhgef10l	32.4593	22.3894	-0.53582	-2.87537	5e-05	0.000124353	yes	0.689767
Arhgef17	17.0771	6.62013	-1.36714	-7.21118	5e-05	0.000124353	yes	0.387659
Arhgef18	10.553	12.7575	0.27369	1.41387	0.0134	0.0230101	yes	1.2089
Arhgef19	14.9887	6.80557	-1.13909	-5.3482	5e-05	0.000124353	yes	0.454046
Arhgef2	204.85	158.668	-0.368556	-1.79832	0.0017	0.00343099	yes	0.774557
Arhgef26	5.75396	0.0562182	-6.67738	-9.17126	5e-05	0.000124353	yes	0.00977031
Arhgef3	6.04261	3.69623	-0.709118	-2.92243	5e-05	0.000124353	yes	0.611694
Arhgef37	1.52164	0.134107	-3.50417	-5.39154	5e-05	0.000124353	yes	0.0881332
Arhgef40	19.8358	25.3448	0.353586	1.52291	0.00775	0.0139072	yes	1.27773
Arhgef5	30.1519	22.6165	-0.414874	-2.2146	0.0001	0.000241206	yes	0.750085
Arhgef6	1.69428	0.507313	-1.73973	-4.57933	5e-05	0.000124353	yes	0.299426
Arhgef9	5.2038	7.59552	0.545582	2.59588	5e-05	0.000124353	yes	1.45961
Arid1b	9.65589	6.36758	-0.600663	-3.17808	5e-05	0.000124353	yes	0.659451
Arid3b	1.14925	0.741186	-0.632787	-1.61869	0.00595	0.0109044	yes	0.644929
Arid4b	9.44843	11.2883	0.256677	1.31903	0.02185	0.0359517	yes	1.19472
Arid5a	4.95232	3.97424	-0.317426	-1.42704	0.01275	0.0219853	yes	0.8025
Arid5b	14.7526	10.4979	-0.490872	-2.50208	5e-05	0.000124353	yes	0.711595
Arih1	36.7349	26.9037	-0.449348	-2.4103	5e-05	0.000124353	yes	0.732374
Arih2	30.0122	17.2868	-0.795877	-4.19859	5e-05	0.000124353	yes	0.575993
Arl10	6.02323	11.6775	0.95512	3.10007	5e-05	0.000124353	yes	1.93874
Arl13b	5.17495	7.9391	0.617429	2.70011	5e-05	0.000124353	yes	1.53414
Arl14ep	17.1308	32.7501	0.93491	4.88292	5e-05	0.000124353	yes	1.91177
Arl15	17.7737	14.9081	-0.253651	-1.29089	0.02445	0.039828	yes	0.838771
Arl16	6.38089	4.40157	-0.535739	-1.32673	0.02685	0.0434294	yes	0.689805
Arl2bp	77.5912	47.6467	-0.703516	-3.73601	5e-05	0.000124353	yes	0.614074
Arl4a	3.71332	5.81663	0.647472	2.63599	5e-05	0.000124353	yes	1.56642
Arl4c	15.7087	60.1184	1.93625	10.1644	5e-05	0.000124353	yes	3.8271
Arl5a	23.9787	14.4915	-0.72654	-3.85392	5e-05	0.000124353	yes	0.604352
Arl5b	7.44442	3.7257	-0.998648	-4.17159	5e-05	0.000124353	yes	0.500469
Arl5c	2.33371	0.769741	-1.60018	-3.20255	5e-05	0.000124353	yes	0.329836
Arl6	12.3641	16.1202	0.382707	1.62608	0.0044	0.00825408	yes	1.30379
Arl6ip1	13.5163	36.9304	1.45011	7.07338	5e-05	0.000124353	yes	2.73229
Arl6ip5	898.284	326.062	-1.46203	-7.163	5e-05	0.000124353	yes	0.362982
Arl8a	62.4854	79.2565	0.34301	1.82979	0.00125	0.00257905	yes	1.2684
Armc10	11.0431	17.4797	0.662537	2.99743	5e-05	0.000124353	yes	1.58286
Armc2	0.997955	0.036255	-4.78272	-4.79348	5e-05	0.000124353	yes	0.0363294
Armc7	2.25506	4.25183	0.914918	1.72423	0.00325	0.00624609	yes	1.88546
Armc8	14.6216	9.99393	-0.548975	-2.76866	5e-05	0.000124353	yes	0.683506
Armcx3	33.7065	23.5905	-0.51482	-2.72722	5e-05	0.000124353	yes	0.69988
Armcx4	8.30663	0.593002	-3.80815	-14.0017	5e-05	0.000124353	yes	0.0713892
Armt1	21.232	17.4524	-0.282814	-1.39386	0.01525	0.0259212	yes	0.821986
Arnt	35.533	20.1522	-0.818225	-4.3102	5e-05	0.000124353	yes	0.567139
Arnt2	1.62152	0.746437	-1.11925	-3.51401	5e-05	0.000124353	yes	0.460333
Arntl2	0.350857	0.768149	1.1305	1.90385	0.0006	0.00130094	yes	2.18935
Arpc1a	35.6826	47.0838	0.400008	2.0553	0.00045	0.000992722	yes	1.31952
Arpc1b	88.6861	151.515	0.772683	4.13777	5e-05	0.000124353	yes	1.70844
Arpc5	23.6794	55.153	1.21981	6.24198	5e-05	0.000124353	yes	2.32916
Arpc5l	68.4112	46.8336	-0.546688	-2.81375	5e-05	0.000124353	yes	0.68459
Arpin	8.92176	20.889	1.22734	5.56761	5e-05	0.000124353	yes	2.34135
Arpp21	34.1495	0.210706	-7.34049	-11.2906	5e-05	0.000124353	yes	0.0061701
Arrb1	0.722516	0.175977	-2.03764	-4.35789	5e-05	0.000124353	yes	0.243562
Arrdc1	4.5828	3.22854	-0.505346	-1.55434	0.00725	0.0131067	yes	0.704491
Arrdc2	3.89868	5.71178	0.550955	1.99985	0.0007	0.00150227	yes	1.46506
Arrdc3	12.4112	10.1308	-0.2929	-1.42533	0.01285	0.0221393	yes	0.81626
Arrdc4	0.297978	3.86357	3.69666	5.31226	5e-05	0.000124353	yes	12.966
Arsb	9.57291	15.9808	0.739313	3.70403	5e-05	0.000124353	yes	1.66938
Arsg	1.08804	0.650229	-0.742707	-1.2461	0.02385	0.0389018	yes	0.597617
Art1	47.8635	0.110404	-8.75999	-8.74223	0.001	0.00209567	yes	0.00230664
Art5	9.1727	0	#NAME?	#NAME?	5e-05	0.000124353	yes	#NAME?
Artn	1.51379	2.82437	0.899767	2.39534	0.0001	0.000241206	yes	1.86576
Arv1	3.32416	6.85406	1.04397	2.95678	5e-05	0.000124353	yes	2.06189
Arvcf	6.54229	3.77336	-0.793947	-1.53592	0.0111	0.0193121	yes	0.576764
Arx	1.40445	0	#NAME?	#NAME?	5e-05	0.000124353	yes	#NAME?
Arxes2	0.783307	1.27831	0.706586	1.30748	0.02685	0.0434294	yes	1.63194
As3mt	6.03248	0.0685482	-6.45949	-5.02172	0.0037	0.00703244	yes	0.0113632
Asap1	23.4004	28.0414	0.261023	1.40561	0.01495	0.0254602	yes	1.19833
Asap2	2.05302	0.540044	-1.9266	-2.97125	0.0001	0.000241206	yes	0.263048
Asb1	10.3331	8.18187	-0.336775	-1.71722	0.00295	0.00572365	yes	0.791809
Asb11	1.96346	0.0664113	-4.88583	-2.88374	0.01975	0.032766	yes	0.0338235
Asb13	1.84451	0	#NAME?	#NAME?	5e-05	0.000124353	yes	#NAME?
Asb14	9.09233	0.039542	-7.84512	-3.72855	0.00215	0.00427312	yes	0.00434894
Asb3	6.9082	4.02071	-0.780859	-2.78653	5e-05	0.000124353	yes	0.58202
Asb5	292.3	220.558	-0.406293	-2.12557	0.00025	0.000572921	yes	0.75456
Asb6	22.8102	16.7094	-0.449017	-2.18662	0.0002	0.000464606	yes	0.732542
Asb8	42.6772	20.7796	-1.0383	-5.27758	5e-05	0.000124353	yes	0.486901
Ascc1	16.5105	29.2782	0.826445	2.23247	0.0001	0.000241206	yes	1.77331
Ascc2	24.9602	36.2245	0.537336	2.80432	5e-05	0.000124353	yes	1.45129
Ascc3	12.3492	16.4524	0.413885	2.20655	0.00015	0.000354026	yes	1.33227
Asf1b	2.64849	0.571756	-2.2117	-4.14594	5e-05	0.000124353	yes	0.21588
Asgr1	0.119768	31.75	8.05037	5.20461	0.0001	0.000241206	yes	265.096
Asic1	2.13034	1.15863	-0.878657	-2.63432	5e-05	0.000124353	yes	0.543873
Asic3	0.291621	0.837664	1.52228	2.29679	0.00105	0.00219304	yes	2.87245
Asl	33.4027	25.1723	-0.408126	-2.00184	0.00045	0.000992722	yes	0.753602
Asns	101.343	205.179	1.01764	5.25452	5e-05	0.000124353	yes	2.0246
Asnsd1	47.5451	30.2861	-0.650642	-3.16797	5e-05	0.000124353	yes	0.636997
Aspa	9.63688	0.687419	-3.8093	-8.15434	5e-05	0.000124353	yes	0.0713323
Asprv1	15.7044	0.25932	-5.9203	-8.66904	5e-05	0.000124353	yes	0.0165125
Asrgl1	5.05411	3.40374	-0.570335	-1.98449	0.00055	0.00119777	yes	0.67346
Aste1	2.34313	3.22674	0.461641	1.29368	0.0251	0.0408225	yes	1.37711
Asun	14.6526	17.5069	0.256768	1.28914	0.02615	0.0423856	yes	1.1948
Asxl1	20.5521	12.937	-0.667785	-3.55463	5e-05	0.000124353	yes	0.629472
Atad1	55.3542	74.5738	0.429976	2.30477	0.0002	0.000464606	yes	1.34721
Atad2b	5.89852	4.83992	-0.285371	-1.41629	0.0137	0.0234895	yes	0.820531
Atad3a	18.1092	38.3112	1.08104	5.51566	5e-05	0.000124353	yes	2.11556
Atad3aos	0.94055	0.23932	-1.97456	-1.87782	0.00955	0.0168542	yes	0.254448
Atat1	14.7908	11.6567	-0.34354	-1.47967	0.0098	0.0172365	yes	0.788105
Ate1	18.459	11.9013	-0.633203	-3.25694	5e-05	0.000124353	yes	0.644743
Atf3	26.5359	116.856	2.13872	10.9199	5e-05	0.000124353	yes	4.40371
Atf4	334.61	716.371	1.09822	5.29325	5e-05	0.000124353	yes	2.1409
Atf5	194.532	440.269	1.17838	4.48672	5e-05	0.000124353	yes	2.26322
Atf6b	30.0114	36.3275	0.27555	1.45235	0.01155	0.0200359	yes	1.21046
Atf7	16.7127	20.2707	0.278451	1.46338	0.0109	0.0189988	yes	1.21289
Atf7ip	12.3212	15.7167	0.351155	1.81342	0.0014	0.00287133	yes	1.27558
Atg101	54.0637	31.3795	-0.784835	-3.88725	5e-05	0.000124353	yes	0.580418
Atg12	40.2555	30.0284	-0.422858	-2.23066	0.00015	0.000354026	yes	0.745945
Atg13	34.1028	19.2493	-0.825084	-4.34773	5e-05	0.000124353	yes	0.564449
Atg16l1	23.456	18.2025	-0.365823	-1.88051	0.0013	0.00267509	yes	0.776026
Atg16l2	7.6781	4.28755	-0.840597	-3.11678	5e-05	0.000124353	yes	0.558412
Atg4a	5.10863	2.28327	-1.16184	-3.66779	5e-05	0.000124353	yes	0.446942
Atg4b	21.8169	30.2416	0.471089	2.46295	5e-05	0.000124353	yes	1.38616
Atg4c	48.676	17.4753	-1.47789	-7.62024	5e-05	0.000124353	yes	0.359014
Atg4d	8.07477	5.58977	-0.530632	-1.45913	0.01325	0.0227778	yes	0.692251
Atg5	18.4435	23.9506	0.376952	1.88892	0.0008	0.00170331	yes	1.2986
Atg9a	53.2842	21.5732	-1.30447	-6.92003	5e-05	0.000124353	yes	0.40487
Atg9b	4.63687	12.8231	1.46752	6.54846	5e-05	0.000124353	yes	2.76546
Athl1	9.40528	6.45761	-0.54247	-2.3816	0.0001	0.000241206	yes	0.686594
Atic	41.6667	82.3159	0.982276	5.24053	5e-05	0.000124353	yes	1.97558
Atl2	31.8601	18.4345	-0.789339	-4.18268	5e-05	0.000124353	yes	0.578609
Atl3	13.6626	33.568	1.29685	6.91681	5e-05	0.000124353	yes	2.45692
Atmin	8.31611	6.92597	-0.263893	-1.27621	0.0234	0.0382281	yes	0.832838
Atoh8	2.11246	0.0765032	-4.78726	-4.70736	0.00025	0.000572921	yes	0.0362152
Atox1	114.439	173.573	0.600958	2.91111	5e-05	0.000124353	yes	1.51672
Atp10a	2.30791	5.55818	1.26803	5.30842	5e-05	0.000124353	yes	2.40832
Atp10d	1.28005	2.29575	0.842768	3.04571	5e-05	0.000124353	yes	1.79349
Atp11a	37.7832	23.9739	-0.656282	-3.48988	5e-05	0.000124353	yes	0.634511
Atp11b	23.5109	16.6879	-0.494523	-2.62474	5e-05	0.000124353	yes	0.709796
Atp11c	1.87493	4.59567	1.29344	5.3015	5e-05	0.000124353	yes	2.45112
Atp13a1	22.5469	29.3507	0.380465	2.02241	0.00055	0.00119777	yes	1.30176
Atp13a2	7.748	10.8479	0.485524	2.34767	0.0001	0.000241206	yes	1.40009
Atp13a3	141.729	65.4092	-1.11557	-5.41853	5e-05	0.000124353	yes	0.461509
Atp1a2	79.7864	0.756233	-6.72117	-23.2483	5e-05	0.000124353	yes	0.00947821
Atp1a3	15.3106	7.98854	-0.938527	-4.45262	5e-05	0.000124353	yes	0.521765
Atp1b1	44.601	80.4319	0.850693	4.2748	5e-05	0.000124353	yes	1.80337
Atp1b2	6.17565	0.0792104	-6.28476	-7.38812	5e-05	0.000124353	yes	0.0128262
Atp1b3	81.6398	59.8707	-0.447423	-2.39003	5e-05	0.000124353	yes	0.733352
Atp2a1	745.801	3.15251	-7.88615	-20.6837	5e-05	0.000124353	yes	0.004227
Atp2a2	753.956	107.795	-2.80619	-11.5069	5e-05	0.000124353	yes	0.142973
Atp2a3	0.740062	0.073988	-3.32228	-3.69866	5e-05	0.000124353	yes	0.0999756
Atp2b1	30.9324	26.357	-0.230934	-1.23881	0.0296	0.0473952	yes	0.852083
Atp2b4	5.25803	0.103248	-5.67034	-10.5817	5e-05	0.000124353	yes	0.0196362
Atp2c1	21.6164	30.0087	0.473255	2.34372	5e-05	0.000124353	yes	1.38824
Atp5e	309.408	231.566	-0.418083	-2.16436	0.00035	0.000785252	yes	0.748418
Atp5g1	277.278	409.295	0.561806	2.9975	5e-05	0.000124353	yes	1.47612
Atp5g2	531.073	693.613	0.385222	2.04084	0.00025	0.000572921	yes	1.30606
Atp5g3	608	502.475	-0.275018	-1.44769	0.01175	0.0203658	yes	0.82644
Atp5sl	9.73854	12.6531	0.37771	1.50695	0.00845	0.0150652	yes	1.29928
Atp6v0a1	42.2412	26.7154	-0.66098	-3.55388	5e-05	0.000124353	yes	0.632449
Atp6v0a2	33.2282	19.6881	-0.755087	-4.03346	5e-05	0.000124353	yes	0.592511
Atp6v0b	197.703	144.814	-0.449136	-2.40951	5e-05	0.000124353	yes	0.732481
Atp6v0d2	7.06112	48.1229	2.76875	12.736	5e-05	0.000124353	yes	6.81517
Atp6v0e	107.436	133.086	0.308881	1.61553	0.0047	0.00877834	yes	1.23875
Atp6v0e2	13.5895	6.09561	-1.15665	-4.6072	5e-05	0.000124353	yes	0.448553
Atp6v1a	80.5648	102.33	0.345006	1.80812	0.0015	0.00305922	yes	1.27016
Atp6v1b2	49.0892	57.7363	0.234071	1.25448	0.0269	0.0434989	yes	1.17615
Atp6v1d	136.444	84.3604	-0.693673	-3.71353	5e-05	0.000124353	yes	0.618278
Atp6v1e1	237.498	149.802	-0.664862	-3.56169	5e-05	0.000124353	yes	0.630749
Atp6v1f	131.437	109.966	-0.257319	-1.3166	0.02195	0.0360732	yes	0.836641
Atp6v1g2	2.56538	0.819071	-1.64711	-3.30517	5e-05	0.000124353	yes	0.319279
Atp6v1h	49.7943	74.0273	0.572077	3.05298	5e-05	0.000124353	yes	1.48666
Atp7a	6.30647	4.55347	-0.469865	-2.31997	0.00015	0.000354026	yes	0.722032
Atp9b	12.8935	20.1222	0.642141	3.38915	5e-05	0.000124353	yes	1.56064
Atpaf1	9.26938	13.0809	0.496913	2.21881	0.0002	0.000464606	yes	1.41119
Atpaf2	16.0413	11.4551	-0.485798	-2.15494	0.0004	0.000888268	yes	0.714102
Atr	2.87511	4.36209	0.601401	2.77153	5e-05	0.000124353	yes	1.51719
Atraid	127.64	93.8273	-0.444002	-2.08597	0.0001	0.000241206	yes	0.735093
Atrnl1	11.2047	13.6069	0.280234	1.4768	0.00975	0.0171608	yes	1.21439
Atxn1	3.70172	1.31631	-1.49169	-6.50851	5e-05	0.000124353	yes	0.355596
Atxn2	35.1929	29.9352	-0.233439	-1.25355	0.0278	0.0448082	yes	0.850605
Atxn2l	55.2247	66.8755	0.276164	1.47703	0.0099	0.017405	yes	1.21097
Atxn3	5.90827	7.72996	0.387724	1.59521	0.00625	0.0114103	yes	1.30833
Atxn7	3.73605	4.70526	0.332762	1.543	0.00765	0.0137536	yes	1.25942
Atxn7l2	3.33911	4.82038	0.529686	1.88583	0.0012	0.00248043	yes	1.44361
Atxn7l3b	31.8246	43.7426	0.458898	2.45651	5e-05	0.000124353	yes	1.37449
Auts2	4.15797	2.22713	-0.900691	-3.74353	5e-05	0.000124353	yes	0.53563
Avl9	3.27849	7.98119	1.28357	6.0272	5e-05	0.000124353	yes	2.43441
Axin2	2.52082	0.340635	-2.88759	-6.86234	5e-05	0.000124353	yes	0.135129
Axl	94.2048	60.4367	-0.640377	-3.32722	5e-05	0.000124353	yes	0.641545
B230118H07Rik	10.3273	7.76544	-0.411323	-1.74902	0.00225	0.00446043	yes	0.751934
B230219D22Rik	36.6387	27.1326	-0.433342	-2.32679	5e-05	0.000124353	yes	0.740544
B230354K17Rik	6.98374	9.02343	0.369675	1.77274	0.0014	0.00287133	yes	1.29206
B2m	396.465	275.655	-0.524333	-2.79371	5e-05	0.000124353	yes	0.69528
B330016D10Rik	1.87327	0.538612	-1.79824	-3.62886	5e-05	0.000124353	yes	0.287525
B3galt4	1.3971	2.57316	0.881106	2.06921	0.0006	0.00130094	yes	1.84179
B3galt6	2.37978	4.26909	0.843101	2.99173	5e-05	0.000124353	yes	1.7939
B3gat3	15.8331	9.23254	-0.778144	-3.2192	5e-05	0.000124353	yes	0.583116
B3glct	3.01319	8.13445	1.43275	6.16154	5e-05	0.000124353	yes	2.69961
B3gnt2	13.25	16.3703	0.305094	1.47829	0.01085	0.0189223	yes	1.2355
B4galnt3	1.24636	0	#NAME?	#NAME?	5e-05	0.000124353	yes	#NAME?
B4galnt4	0.232467	3.61445	3.95868	7.42362	5e-05	0.000124353	yes	15.5482
B4galt3	12.8664	17.9354	0.479209	2.21191	5e-05	0.000124353	yes	1.39398
B4galt4	8.6012	4.71046	-0.868669	-3.39733	5e-05	0.000124353	yes	0.547652
B4galt5	25.377	12.3297	-1.04138	-5.40127	5e-05	0.000124353	yes	0.485863
B4galt6	13.2927	7.74767	-0.778799	-3.9817	5e-05	0.000124353	yes	0.582852
B4gat1	54.014	30.2666	-0.835608	-4.36456	5e-05	0.000124353	yes	0.560347
B630005N14Rik	8.16685	5.97814	-0.450083	-2.07354	0.0005	0.00109639	yes	0.732001
B630019K06Rik	1.40781	2.11136	0.584721	1.61731	0.0066	0.0120192	yes	1.49975
B930041F14Rik	3.23842	7.06819	1.12605	3.95381	5e-05	0.000124353	yes	2.1826
B9d1	8.76653	14.1452	0.690238	2.2197	0.0002	0.000464606	yes	1.61355
BC004004	48.2086	27.6826	-0.800311	-4.24292	5e-05	0.000124353	yes	0.574225
BC005561	3.26729	4.1797	0.355303	1.50634	0.00945	0.0166944	yes	1.27925
BC005624	37.82	27.3292	-0.468702	-2.27712	5e-05	0.000124353	yes	0.722614
BC017158	6.5458	10.0001	0.611374	2.6187	5e-05	0.000124353	yes	1.52771
BC022687	22.0985	51.1213	1.20998	6.14536	5e-05	0.000124353	yes	2.31334
BC023829	28.0305	34.9839	0.319696	1.64193	0.00395	0.00747209	yes	1.24807
BC029214	19.705	4.54664	-2.11569	-6.64883	5e-05	0.000124353	yes	0.230735
BC029722	63.3151	26.6435	-1.24876	-6.20562	5e-05	0.000124353	yes	0.42081
BC031181	57.0524	68.6724	0.267441	1.36844	0.01855	0.0309741	yes	1.20367
BC037034	6.80885	10.0967	0.568398	2.29698	0.00015	0.000354026	yes	1.48288
BC048403	3.73362	10.0943	1.43489	5.92145	5e-05	0.000124353	yes	2.70362
BC051019	20.024	0.112255	-7.47881	-7.52549	0.0188	0.031362	yes	0.00560601
BC052040	3.6341	7.21337	0.989073	3.85082	5e-05	0.000124353	yes	1.98491
BC068281	7.85856	6.05438	-0.376285	-1.49548	0.00975	0.0171608	yes	0.770419
Baalc	5.6408	0.762571	-2.88696	-8.70937	5e-05	0.000124353	yes	0.135188
Babam1	47.3187	35.6622	-0.408014	-2.09678	0.00025	0.000572921	yes	0.75366
Bace1	34.5305	25.1764	-0.455798	-2.44109	5e-05	0.000124353	yes	0.729107
Bace2	2.97019	0.466063	-2.67196	-6.68281	5e-05	0.000124353	yes	0.156913
Bach1	15.5406	12.9229	-0.266118	-1.40215	0.014	0.0239641	yes	0.831554
Bag1	270.243	98.5807	-1.45488	-7.74183	5e-05	0.000124353	yes	0.364785
Bag2	31.8979	26.4495	-0.270222	-1.36	0.01785	0.0298818	yes	0.829192
Bag3	67.2873	49.1046	-0.454477	-2.43785	5e-05	0.000124353	yes	0.729775
Bag4	4.37724	9.90125	1.17759	5.45973	5e-05	0.000124353	yes	2.26199
Bahd1	10.9787	7.0885	-0.63116	-3.06614	5e-05	0.000124353	yes	0.645657
Baiap2	12.8966	28.1585	1.12658	5.33567	5e-05	0.000124353	yes	2.18341
Baiap2l1	71.4225	21.1203	-1.75775	-7.49714	5e-05	0.000124353	yes	0.295709
Banf1	134.648	193.872	0.52591	2.20657	5e-05	0.000124353	yes	1.43984
Banp	6.8822	8.94995	0.37901	1.86792	0.0008	0.00170331	yes	1.30045
Bard1	0.535087	1.15038	1.10427	2.99268	5e-05	0.000124353	yes	2.1499
Basp1	20.2905	11.155	-0.863115	-3.88381	5e-05	0.000124353	yes	0.549764
Bax	80.55	99.5096	0.304951	1.58046	0.007	0.0126843	yes	1.23538
Baz1b	30.3671	37.3839	0.299907	1.60688	0.00445	0.00834409	yes	1.23107
Bbc3	9.45169	6.93921	-0.445801	-1.78554	0.0027	0.00527325	yes	0.734177
Bbip1	14.0275	6.28477	-1.15832	-2.34166	5e-05	0.000124353	yes	0.448034
Bbs12	4.16077	8.08386	0.958195	3.69411	5e-05	0.000124353	yes	1.94288
Bbs5	11.543	6.76213	-0.771465	-2.85615	5e-05	0.000124353	yes	0.585822
Bbs7	3.85158	2.29995	-0.743847	-2.43464	5e-05	0.000124353	yes	0.597145
Bbs9	5.38109	2.86851	-0.907595	-3.46818	5e-05	0.000124353	yes	0.533073
Bcam	60.4614	0.170466	-8.47039	-12.7997	5e-05	0.000124353	yes	0.00281941
Bcar1	28.7995	20.1142	-0.517826	-2.71448	5e-05	0.000124353	yes	0.698423
Bcar3	14.5241	19.0281	0.389683	1.98096	0.00065	0.001402	yes	1.31011
Bcat1	2.89906	12.2454	2.07858	9.90381	5e-05	0.000124353	yes	4.22391
Bcat2	38.3208	25.247	-0.602018	-3.04382	5e-05	0.000124353	yes	0.658832
Bche	0.0846703	2.1209	4.64668	7.92757	5e-05	0.000124353	yes	25.049
Bckdk	28.4826	15.9302	-0.838312	-4.28891	5e-05	0.000124353	yes	0.559298
Bcl2	2.0173	2.57473	0.351998	1.38919	0.016	0.0271032	yes	1.27633
Bcl2l1	35.4144	13.3007	-1.41284	-7.00343	5e-05	0.000124353	yes	0.375572
Bcl2l11	9.17373	5.06309	-0.857489	-3.95438	5e-05	0.000124353	yes	0.551912
Bcl2l13	23.7137	11.0545	-1.10109	-5.85642	5e-05	0.000124353	yes	0.466164
Bcl2l2	32.2691	22.164	-0.541934	-2.86803	5e-05	0.000124353	yes	0.68685
Bcl3	3.13939	0.829976	-1.91935	-4.31795	5e-05	0.000124353	yes	0.264374
Bcl6	76.4939	21.3678	-1.8399	-9.69469	5e-05	0.000124353	yes	0.279341
Bcl7b	18.3862	26.0648	0.503484	2.39666	5e-05	0.000124353	yes	1.41763
Bcl9l	19.8849	11.6316	-0.773626	-4.06186	5e-05	0.000124353	yes	0.584945
Bclaf1	26.5034	37.6014	0.504608	2.68851	5e-05	0.000124353	yes	1.41874
Bcor	9.66943	6.71429	-0.526197	-2.65284	5e-05	0.000124353	yes	0.694383
Bcr	8.0679	12.2941	0.607703	3.13599	5e-05	0.000124353	yes	1.52383
Bdh2	5.89735	18.709	1.66559	5.8316	5e-05	0.000124353	yes	3.17243
Bdkrb1	4.79244	0.931333	-2.36339	-4.95564	5e-05	0.000124353	yes	0.194334
Bdkrb2	7.90403	4.13385	-0.935104	-3.19499	5e-05	0.000124353	yes	0.523005
Bdnf	4.54595	6.59043	0.535792	2.34902	5e-05	0.000124353	yes	1.44974
Bdp1	6.94848	5.59473	-0.312629	-1.61727	0.00515	0.00954976	yes	0.805173
Bean1	0.956721	0.144669	-2.72534	-3.93691	5e-05	0.000124353	yes	0.151214
Becn1	83.2039	59.0145	-0.495581	-2.64603	5e-05	0.000124353	yes	0.709276
Bend3	3.60231	4.8405	0.426233	1.91785	0.00065	0.001402	yes	1.34372
Bend6	2.55345	10.5445	2.04597	7.16729	5e-05	0.000124353	yes	4.12951
Best1	3.76727	0.0779981	-5.59394	-5.69724	0.0009	0.00190089	yes	0.0207041
Best3	2.23095	0.20516	-3.44283	-5.78331	5e-05	0.000124353	yes	0.0919613
Bet1l	20.9279	16.5592	-0.337793	-1.53786	0.00775	0.0139072	yes	0.791251
Bfar	26.3911	18.9384	-0.47874	-2.41011	5e-05	0.000124353	yes	0.717604
Bglap2	178.329	6.4422	-4.79084	-12.9764	5e-05	0.000124353	yes	0.0361255
Bgn	402.779	49.3563	-3.02868	-15.1061	5e-05	0.000124353	yes	0.12254
Bhlhb9	12.5951	9.38798	-0.423981	-1.96974	0.0008	0.00170331	yes	0.745365
Bhlhe40	60.4808	29.5182	-1.03487	-5.48602	5e-05	0.000124353	yes	0.48806
Bhlhe41	18.2498	5.27699	-1.7901	-8.93083	5e-05	0.000124353	yes	0.289152
Bicc1	4.96834	1.66266	-1.57927	-5.26428	5e-05	0.000124353	yes	0.334651
Bicd1	1.77336	1.04625	-0.761259	-2.94848	5e-05	0.000124353	yes	0.589981
Bicd2	99.709	35.6355	-1.48441	-7.73039	5e-05	0.000124353	yes	0.357395
Bid	33.1695	23.9728	-0.468458	-2.35318	5e-05	0.000124353	yes	0.722737
Bik	2.54179	0	#NAME?	#NAME?	5e-05	0.000124353	yes	#NAME?
Bin1	856.652	146.345	-2.54934	-11.8471	5e-05	0.000124353	yes	0.170833
Birc2	14.7065	10.0672	-0.5468	-2.66514	5e-05	0.000124353	yes	0.684537
Birc6	12.1903	10.1298	-0.267132	-1.43121	0.01135	0.0197194	yes	0.83097
Bivm	6.7538	10.0193	0.569014	2.6283	5e-05	0.000124353	yes	1.48351
Blcap	16.798	24.3163	0.533635	2.59786	5e-05	0.000124353	yes	1.44757
Blm	0.767313	1.2646	0.720798	1.99647	0.0008	0.00170331	yes	1.64809
Blmh	30.9342	11.7779	-1.39312	-6.74666	5e-05	0.000124353	yes	0.380741
Blnk	7.51985	30.9839	2.04274	9.08741	5e-05	0.000124353	yes	4.12027
Bloc1s1	110.471	91.4867	-0.27203	-1.32466	0.02025	0.0335148	yes	0.828153
Bloc1s5	12.9433	21.2326	0.714081	3.25457	5e-05	0.000124353	yes	1.64044
Bloc1s6	16.618	10.1683	-0.708661	-3.51144	5e-05	0.000124353	yes	0.611888
Blvrb	16.8813	26.9223	0.673374	2.68619	5e-05	0.000124353	yes	1.5948
Blzf1	11.2008	8.97617	-0.319436	-1.54972	0.00635	0.0115861	yes	0.801383
Bmf	6.53367	0.839791	-2.95979	-9.61864	5e-05	0.000124353	yes	0.128533
Bmp1	67.0719	42.2474	-0.666845	-3.53933	5e-05	0.000124353	yes	0.629883
Bmp4	10.0404	0	#NAME?	#NAME?	5e-05	0.000124353	yes	#NAME?
Bmper	12.3008	2.59829	-2.24311	-9.20858	5e-05	0.000124353	yes	0.21123
Bmpr2	15.6408	10.9481	-0.514634	-2.75758	5e-05	0.000124353	yes	0.69997
Bmyc	0.936124	0	#NAME?	#NAME?	5e-05	0.000124353	yes	#NAME?
Bnc2	4.31352	7.61352	0.819697	3.93277	5e-05	0.000124353	yes	1.76504
Bnip2	30.9186	36.7786	0.250388	1.33786	0.0191	0.0317983	yes	1.18953
Bnip3	44.0353	30.1694	-0.545573	-2.8006	5e-05	0.000124353	yes	0.685119
Boc	4.00883	2.62409	-0.611364	-2.40399	5e-05	0.000124353	yes	0.654578
Bod1	82.6903	43.4979	-0.926774	-4.82538	5e-05	0.000124353	yes	0.526033
Bola3	44.3593	60.1105	0.438381	1.85135	0.0017	0.00343099	yes	1.35508
Bora	1.4399	2.30011	0.675737	1.80949	0.0025	0.00491049	yes	1.59741
Bpgm	17.2639	13.3363	-0.3724	-1.72494	0.003	0.00581156	yes	0.772496
Braf	4.4548	6.69274	0.587236	2.98528	5e-05	0.000124353	yes	1.50237
Brap	29.5673	24.8878	-0.248561	-1.32093	0.01905	0.0317278	yes	0.841736
Brat1	10.3404	8.04189	-0.362687	-1.67981	0.00325	0.00624609	yes	0.777715
Brca2	0.608783	1.22481	1.00856	3.50657	5e-05	0.000124353	yes	2.0119
Brd2	65.5393	105.334	0.684534	3.5814	5e-05	0.000124353	yes	1.60718
Brd3	23.0457	11.8478	-0.959884	-5.06724	5e-05	0.000124353	yes	0.514098
Brd7	62.8374	39.935	-0.653971	-3.48875	5e-05	0.000124353	yes	0.635529
Brd8	15.0358	20.0758	0.417054	1.52509	0.0083	0.0148105	yes	1.3352
Bri3bp	3.83383	8.74738	1.19006	5.77303	5e-05	0.000124353	yes	2.28162
Brinp3	65.2576	15.2718	-2.09528	-10.4761	5e-05	0.000124353	yes	0.234023
Brip1os	5.28106	8.93937	0.759344	1.41359	0.0173	0.0290591	yes	1.69272
Brix1	23.0821	36.3636	0.65572	3.42034	5e-05	0.000124353	yes	1.5754
Brms1l	17.4805	22.9369	0.391925	1.97658	0.00065	0.001402	yes	1.31214
Brpf1	9.88585	12.3259	0.318254	1.6041	0.00505	0.00938257	yes	1.24682
Brpf3	3.73974	6.94132	0.892271	4.14708	5e-05	0.000124353	yes	1.8561
Brwd1	25.3934	14.9339	-0.765861	-3.47334	5e-05	0.000124353	yes	0.588102
Bscl2	1.46088	3.03302	1.05391	2.53122	5e-05	0.000124353	yes	2.07615
Bsdc1	33.9354	24.3522	-0.478736	-2.49878	5e-05	0.000124353	yes	0.717606
Bst2	18.8983	2.31851	-3.02698	-7.18167	5e-05	0.000124353	yes	0.122684
Btaf1	6.3435	10.9267	0.784503	4.07782	5e-05	0.000124353	yes	1.7225
Btbd1	61.6526	30.7561	-1.00329	-5.35678	5e-05	0.000124353	yes	0.498861
Btbd10	8.56109	13.6398	0.671958	3.05022	5e-05	0.000124353	yes	1.59323
Btbd11	10.9747	25.1667	1.19734	6.04293	5e-05	0.000124353	yes	2.29316
Btbd17	1.39646	0	#NAME?	#NAME?	5e-05	0.000124353	yes	#NAME?
Btbd19	3.7521	7.71135	1.03929	3.99709	5e-05	0.000124353	yes	2.05522
Btbd2	26.5708	35.7907	0.429744	2.27097	5e-05	0.000124353	yes	1.34699
Btbd3	3.6848	4.69833	0.350562	1.4885	0.00945	0.0166944	yes	1.27506
Btbd8	1.03834	2.07669	1.00001	1.87045	0.0035	0.00668716	yes	2.00001
Btbd9	8.10103	6.19592	-0.386787	-1.94558	0.00095	0.001999	yes	0.764831
Btc	0.582626	4.93665	3.08289	7.6517	5e-05	0.000124353	yes	8.4731
Btf3	379.502	457.835	0.270722	1.42689	0.0132	0.0227139	yes	1.20641
Btg1	32.8688	48.3373	0.556417	2.96117	5e-05	0.000124353	yes	1.47061
Btg2	13.4665	3.8642	-1.80114	-7.5857	5e-05	0.000124353	yes	0.286948
Btrc	7.86477	5.61937	-0.484997	-2.37505	5e-05	0.000124353	yes	0.714499
Bub3	39.5532	53.4837	0.435307	2.29974	5e-05	0.000124353	yes	1.3522
Bud13	8.21305	6.38029	-0.364297	-1.46479	0.01075	0.018769	yes	0.776847
Bves	156.127	124.396	-0.327774	-1.7559	0.0018	0.00362044	yes	0.796765
Bysl	31.6666	19.7239	-0.683014	-2.17108	0.00075	0.00160485	yes	0.622863
Bzw1	52.6193	78.8381	0.583302	3.13005	5e-05	0.000124353	yes	1.49827
Bzw2	30.1867	102.955	1.77003	9.24255	5e-05	0.000124353	yes	3.41061
C030037D09Rik	2.48011	1.28271	-0.951207	-1.83992	0.0029	0.00563987	yes	0.5172
C030039L03Rik	0.937566	1.64743	0.813227	2.44075	0.00015	0.000354026	yes	1.75714
C130080G10Rik	23.811	0.0565726	-8.71731	-7.52952	0.0078	0.0139888	yes	0.0023759
C130083M11Rik	0.999877	0.455474	-1.13438	-2.03509	0.00115	0.00238543	yes	0.455531
C1galt1c1	46.0347	20.5957	-1.16038	-5.66	5e-05	0.000124353	yes	0.447395
C1qbp	104.717	257.151	1.29611	6.73674	5e-05	0.000124353	yes	2.45566
C1qtnf3	158.048	1.41562	-6.80279	-21.3093	5e-05	0.000124353	yes	0.00895687
C1qtnf5	9.36804	0.0993636	-6.55889	-4.27083	0.0178	0.0298262	yes	0.0106066
C1qtnf6	33.6645	26.2531	-0.358739	-1.84842	0.001	0.00209567	yes	0.779846
C1rb	1.84288	1.12639	-0.710261	-1.72056	0.0043	0.00808361	yes	0.61121
C230091D08Rik	8.16581	5.35093	-0.609805	-2.71406	5e-05	0.000124353	yes	0.655285
C2cd2	7.03555	4.08203	-0.785376	-3.73003	5e-05	0.000124353	yes	0.580201
C2cd2l	7.92667	4.47815	-0.823811	-3.69938	5e-05	0.000124353	yes	0.564948
C2cd3	3.77917	4.66452	0.303658	1.4419	0.011	0.0191515	yes	1.23427
C2cd5	12.5059	4.10513	-1.6071	-7.30451	5e-05	0.000124353	yes	0.328258
C330006A16Rik	25.7929	18.6553	-0.467384	-2.34522	5e-05	0.000124353	yes	0.723275
C330007P06Rik	13.7484	17.0208	0.308036	1.55645	0.00665	0.0120996	yes	1.23802
C330027C09Rik	1.27277	1.92131	0.594114	1.82893	0.00235	0.00463643	yes	1.50955
C530008M17Rik	0.683537	3.67151	2.42528	8.18403	5e-05	0.000124353	yes	5.37133
C920009B18Rik	1.60985	4.15871	1.36921	4.02764	5e-05	0.000124353	yes	2.58329
C920025E04Rik	5.24257	3.09825	-0.758824	-2.13102	0.0005	0.00109639	yes	0.590978
Caap1	16.2707	6.84093	-1.25001	-5.33974	5e-05	0.000124353	yes	0.420445
Cab39l	15.2929	8.22668	-0.894484	-4.1845	5e-05	0.000124353	yes	0.53794
Cabin1	16.4006	20.6037	0.329162	1.76512	0.00235	0.00463643	yes	1.25628
Cables2	6.90568	5.07086	-0.445554	-1.8356	0.00175	0.00352559	yes	0.734302
Cabp1	0.125285	1.51684	3.59779	3.3455	0.0028	0.00545996	yes	12.1072
Cacfd1	28.1985	22.824	-0.305067	-1.4801	0.01065	0.0186127	yes	0.809405
Cachd1	1.47862	4.03105	1.44691	5.34567	5e-05	0.000124353	yes	2.72624
Cacna1a	0.143495	1.29451	3.17333	6.89423	5e-05	0.000124353	yes	9.02127
Cacna1s	65.2103	0.928238	-6.13446	-22.4694	5e-05	0.000124353	yes	0.0142345
Cacna2d1	63.1314	21.892	-1.52795	-7.98489	5e-05	0.000124353	yes	0.34677
Cacnb1	163.639	6.24795	-4.71099	-19.253	5e-05	0.000124353	yes	0.0381813
Cacnb2	2.11566	4.49195	1.08623	4.0048	5e-05	0.000124353	yes	2.12318
Cacnb3	87.2946	46.5479	-0.907175	-4.75468	5e-05	0.000124353	yes	0.533228
Cacng1	334.28	102.295	-1.70832	-8.95026	5e-05	0.000124353	yes	0.306016
Cacng6	2.80698	0	#NAME?	#NAME?	5e-05	0.000124353	yes	#NAME?
Cacng7	0.483096	1.81192	1.90714	2.38487	0.0007	0.00150227	yes	3.75065
Cactin	15.4934	25.2493	0.704589	3.55858	5e-05	0.000124353	yes	1.62968
Cacul1	13.6906	11.1428	-0.297062	-1.56901	0.00725	0.0131067	yes	0.813908
Cad	8.9513	20.8924	1.22281	6.51128	5e-05	0.000124353	yes	2.33401
Cadm1	4.04955	25.1993	2.63755	12.2904	5e-05	0.000124353	yes	6.22274
Cadm4	12.188	9.51196	-0.357648	-1.56215	0.0073	0.0131855	yes	0.780436
Cahm	1.2034	0.656284	-0.874726	-1.3952	0.0187	0.0312036	yes	0.545357
Calcoco1	164.67	58.828	-1.485	-7.79965	5e-05	0.000124353	yes	0.357249
Calcrl	2.40201	7.36995	1.61741	6.70653	5e-05	0.000124353	yes	3.06824
Cald1	83.5742	126.253	0.595188	3.08678	5e-05	0.000124353	yes	1.51067
Calm2	140.773	247.72	0.815341	4.35614	5e-05	0.000124353	yes	1.75971
Calm3	92.6441	77.2596	-0.261986	-1.40827	0.01445	0.0246697	yes	0.833939
Calml4	6.19209	0.545312	-3.50527	-2.08588	0.029	0.0465306	yes	0.0880661
Calr3	1.2419	3.44818	1.47329	3.51788	5e-05	0.000124353	yes	2.77654
Calu	280.747	202.378	-0.472218	-2.31101	5e-05	0.000124353	yes	0.720856
Camk1d	0.430988	0.799762	0.891923	2.37344	5e-05	0.000124353	yes	1.85565
Camk1g	3.34253	0.0747436	-5.48285	-5.5445	0.0002	0.000464606	yes	0.0223613
Camk2a	32.9674	1.2954	-4.66957	-17.3094	5e-05	0.000124353	yes	0.0392934
Camk2g	48.1754	35.7509	-0.430317	-2.30111	5e-05	0.000124353	yes	0.742099
Camk2n1	0.797739	0.136163	-2.55058	-3.91048	5e-05	0.000124353	yes	0.170686
Camkmt	1.35242	2.7603	1.02928	2.33309	5e-05	0.000124353	yes	2.04101
Camsap1	16.1335	7.9876	-1.01423	-5.35593	5e-05	0.000124353	yes	0.495093
Camsap2	10.9495	14.3804	0.39325	2.09007	0.00015	0.000354026	yes	1.31335
Camta1	1.937	1.1625	-0.73659	-1.76971	0.00275	0.00536583	yes	0.600156
Camta2	18.1128	13.3067	-0.444857	-2.30354	5e-05	0.000124353	yes	0.734657
Cand1	21.5989	29.1165	0.430882	2.30891	0.0001	0.000241206	yes	1.34806
Cand2	29.2545	3.5757	-3.03236	-3.62782	5e-05	0.000124353	yes	0.122227
Cant1	26.586	35.0059	0.396929	2.09838	0.0004	0.000888268	yes	1.3167
Cap1	58.0746	74.9465	0.367954	1.47874	0.0106	0.018541	yes	1.29052
Cap2	108.398	0.400107	-8.08173	-20.3521	5e-05	0.000124353	yes	0.00369111
Capg	66.789	215.707	1.69139	8.79646	5e-05	0.000124353	yes	3.22968
Capn1	33.3903	19.4636	-0.778655	-4.01717	5e-05	0.000124353	yes	0.58291
Capn10	6.00405	9.14622	0.607238	2.60731	5e-05	0.000124353	yes	1.52334
Capn15	5.22663	10.6776	1.03064	4.5499	5e-05	0.000124353	yes	2.04293
Capn3	13.794	6.57056	-1.06996	-2.33949	0.0002	0.000464606	yes	0.476332
Capn5	4.01356	3.10748	-0.369136	-1.4611	0.0106	0.018541	yes	0.774246
Capn6	3.48377	6.61559	0.92522	3.74016	5e-05	0.000124353	yes	1.89897
Capn7	21.465	17.7684	-0.272677	-1.42029	0.01295	0.0223054	yes	0.827782
Capns1	245.79	292.586	0.251434	1.32308	0.0208	0.0343792	yes	1.19039
Capza1	40.5765	54.1856	0.417264	2.23732	0.0001	0.000241206	yes	1.33539
Capza2	152.936	126.719	-0.271298	-1.44577	0.01205	0.0208508	yes	0.828574
Capzb	156.706	88.0734	-0.831278	-4.42012	5e-05	0.000124353	yes	0.562031
Car11	11.5504	7.24584	-0.672717	-2.52789	0.0001	0.000241206	yes	0.627324
Car13	37.9917	71.1267	0.904705	4.8179	5e-05	0.000124353	yes	1.87216
Car3	51.711	0.217369	-7.89418	-11.2235	5e-05	0.000124353	yes	0.00420354
Car5b	5.91724	0.586291	-3.33523	-8.93783	5e-05	0.000124353	yes	0.0990822
Car6	1.64492	12.2611	2.89799	7.6443	5e-05	0.000124353	yes	7.45387
Car8	0.0853858	5.70424	6.0619	10.1971	5e-05	0.000124353	yes	66.8057
Card10	0.713529	0.0372893	-4.25814	-4.2271	0.00015	0.000354026	yes	0.0522603
Card14	4.35551	0.512353	-3.08763	-4.41049	5e-05	0.000124353	yes	0.117633
Card6	6.57907	8.61348	0.388714	1.84804	0.0013	0.00267509	yes	1.30923
Carhsp1	69.8483	51.9016	-0.428447	-2.28594	5e-05	0.000124353	yes	0.743061
Carns1	6.76131	0.875254	-2.94953	-9.32867	5e-05	0.000124353	yes	0.12945
Casc3	19.7069	29.4965	0.581843	2.04989	0.0002	0.000464606	yes	1.49676
Casc4	20.9783	5.97321	-1.81232	-8.72727	5e-05	0.000124353	yes	0.284733
Casp1	3.44436	0.140768	-4.61284	-5.07506	5e-05	0.000124353	yes	0.0408693
Casp2	4.9033	8.13729	0.730795	3.18294	5e-05	0.000124353	yes	1.65955
Casp3	17.5316	14.3795	-0.285939	-1.40243	0.01485	0.0253003	yes	0.820208
Casp4	25.3728	9.3371	-1.44224	-5.962	5e-05	0.000124353	yes	0.367995
Casp6	9.24131	16.171	0.807242	3.27852	5e-05	0.000124353	yes	1.74986
Casp8	4.6428	8.10741	0.804247	3.21239	5e-05	0.000124353	yes	1.74623
Casp9	4.13591	5.53878	0.421362	1.76951	0.0019	0.00380675	yes	1.33919
Casq1	339.958	0.470817	-9.49598	-19.733	5e-05	0.000124353	yes	0.00138492
Casq2	571.92	7.18345	-6.31499	-26.6129	5e-05	0.000124353	yes	0.0125603
Cast	48.006	63.2786	0.398503	2.11958	0.00025	0.000572921	yes	1.31814
Casz1	6.42863	0.133446	-5.59018	-10.817	5e-05	0.000124353	yes	0.0207581
Catsper2	2.23437	0.945647	-1.2405	-2.99985	5e-05	0.000124353	yes	0.423226
Cav2	3.99347	7.06728	0.823512	3.20504	5e-05	0.000124353	yes	1.76971
Cav3	67.4413	0.228242	-8.20693	-9.85372	5e-05	0.000124353	yes	0.00338429
Cbfa2t2	8.98015	6.8222	-0.396502	-1.9935	0.0004	0.000888268	yes	0.759698
Cbfa2t3	6.03934	0.383224	-3.97813	-12.217	5e-05	0.000124353	yes	0.0634547
Cbfb	77.8617	60.9518	-0.353247	-1.88359	0.001	0.00209567	yes	0.78282
Cbl	4.4221	5.66749	0.357977	1.61126	0.006	0.0109863	yes	1.28163
Cblb	7.14514	10.1401	0.505033	2.57447	5e-05	0.000124353	yes	1.41916
Cbr1	30.2741	39.6667	0.389845	1.84243	0.00145	0.0029675	yes	1.31025
Cbr2	24.7141	10.4024	-1.24842	-4.8063	5e-05	0.000124353	yes	0.420909
Cbr3	9.54956	12.2824	0.363092	1.34228	0.0209	0.0345215	yes	1.28618
Cbx2	5.16656	3.28843	-0.651805	-2.60669	5e-05	0.000124353	yes	0.636483
Cbx3	50.016	61.7631	0.304356	1.6141	0.00425	0.0079981	yes	1.23487
Cbx4	6.88389	10.0732	0.549221	2.71234	5e-05	0.000124353	yes	1.4633
Cbx5	57.729	37.2664	-0.631421	-3.24226	5e-05	0.000124353	yes	0.64554
Cbx7	9.70948	5.6238	-0.787848	-3.37494	5e-05	0.000124353	yes	0.579207
Cbx8	5.58131	9.03904	0.695565	2.40431	5e-05	0.000124353	yes	1.61952
Cby1	23.5735	29.1832	0.307972	1.39259	0.01555	0.0263805	yes	1.23797
Cc2d1a	30.7039	20.4924	-0.583334	-3.06382	5e-05	0.000124353	yes	0.66742
Cc2d2a	2.56169	3.67616	0.521106	2.13961	0.0005	0.00109639	yes	1.43505
Ccbl1	8.00887	5.94614	-0.429646	-1.63939	0.00435	0.0081677	yes	0.742444
Ccbl2	2.11753	7.92425	1.90389	6.2488	5e-05	0.000124353	yes	3.74221
Ccdc101	9.57359	14.8318	0.631564	2.38944	5e-05	0.000124353	yes	1.54924
Ccdc102a	8.52567	6.66866	-0.354417	-1.45114	0.0113	0.0196352	yes	0.782186
Ccdc106	0.315402	0.888677	1.49447	1.70268	0.00095	0.001999	yes	2.81761
Ccdc107	51.3087	33.4887	-0.615526	-2.80664	5e-05	0.000124353	yes	0.652692
Ccdc109b	4.02637	10.4532	1.37639	4.44363	5e-05	0.000124353	yes	2.59618
Ccdc112	1.66449	3.52713	1.08341	3.3785	5e-05	0.000124353	yes	2.11904
Ccdc114	1.09926	0.707642	-0.635443	-1.35989	0.0198	0.0328446	yes	0.643743
Ccdc117	24.1226	19.6774	-0.293847	-1.53595	0.00715	0.0129448	yes	0.815724
Ccdc120	1.37901	2.5309	0.876021	2.74973	5e-05	0.000124353	yes	1.83531
Ccdc122	3.79678	5.01283	0.40085	1.29258	0.0284	0.0456625	yes	1.32029
Ccdc124	81.2258	64.0533	-0.342664	-1.74758	0.0026	0.005094	yes	0.788584
Ccdc126	5.11226	7.70478	0.591795	2.30562	0.0001	0.000241206	yes	1.50712
Ccdc130	12.6791	9.92518	-0.353286	-1.56856	0.0073	0.0131855	yes	0.782799
Ccdc134	29.6412	8.02716	-1.88464	-8.45991	5e-05	0.000124353	yes	0.270811
Ccdc136	22.7698	9.16013	-1.31368	-6.43711	5e-05	0.000124353	yes	0.402293
Ccdc137	5.66506	13.8392	1.28859	4.9485	5e-05	0.000124353	yes	2.44289
Ccdc14	1.76547	2.32298	0.395924	1.34373	0.02175	0.0357967	yes	1.31579
Ccdc141	66.673	1.01523	-6.03722	-22.8324	5e-05	0.000124353	yes	0.015227
Ccdc142	2.60202	4.36152	0.745199	1.66859	0.00835	0.0148976	yes	1.67621
Ccdc157	10.9128	6.18587	-0.818968	-3.29366	5e-05	0.000124353	yes	0.566847
Ccdc162	1.92674	0.145713	-3.72496	-5.84882	5e-05	0.000124353	yes	0.0756267
Ccdc163	3.92591	2.61782	-0.584663	-1.48989	0.01065	0.0186127	yes	0.666805
Ccdc166	0.964525	2.10826	1.12816	2.78941	5e-05	0.000124353	yes	2.1858
Ccdc174	12.2086	15.0375	0.300673	1.31821	0.02265	0.0371055	yes	1.23172
Ccdc181	19.9228	12.5556	-0.66609	-3.05485	5e-05	0.000124353	yes	0.630212
Ccdc186	12.2886	20.249	0.720534	3.53808	5e-05	0.000124353	yes	1.64779
Ccdc22	18.7645	12.6376	-0.570286	-1.98538	0.0012	0.00248043	yes	0.673483
Ccdc23	49.7146	19.2369	-1.3698	-5.59705	5e-05	0.000124353	yes	0.386945
Ccdc28b	5.74597	1.56485	-1.87653	-3.788	5e-05	0.000124353	yes	0.272338
Ccdc3	2.0693	11.3705	2.45808	8.65686	5e-05	0.000124353	yes	5.49485
Ccdc30	0.35843	0.652243	0.863718	1.13365	0.0246	0.0400566	yes	1.81972
Ccdc43	31.3682	16.9944	-0.884244	-4.43895	5e-05	0.000124353	yes	0.541771
Ccdc47	53.5966	45.387	-0.239864	-1.28718	0.02525	0.0410288	yes	0.846825
Ccdc50	16.6383	23.2624	0.483489	2.59455	5e-05	0.000124353	yes	1.39812
Ccdc53	49.343	31.0803	-0.666846	-3.20775	5e-05	0.000124353	yes	0.629882
Ccdc55	11.7309	8.78082	-0.417893	-1.95899	0.00045	0.000992722	yes	0.748517
Ccdc57	2.79165	4.36441	0.644665	2.4044	5e-05	0.000124353	yes	1.56338
Ccdc58	11.9267	17.8037	0.577988	2.10112	0.00035	0.000785252	yes	1.49277
Ccdc62	0.648352	1.23171	0.925809	2.34315	0.0002	0.000464606	yes	1.89975
Ccdc64	0.867754	0.490312	-0.823586	-1.39749	0.01955	0.0324733	yes	0.565036
Ccdc65	1.47615	0.619265	-1.25321	-2.44442	0.0003	0.000679963	yes	0.419514
Ccdc66	10.5498	13.9082	0.398715	1.44154	0.0124	0.0214176	yes	1.31833
Ccdc8	17.5623	4.55685	-1.94638	-7.72033	5e-05	0.000124353	yes	0.259466
Ccdc80	60.8263	17.4369	-1.80255	-9.47829	5e-05	0.000124353	yes	0.286667
Ccdc85b	4.35928	7.91569	0.860626	3.69324	5e-05	0.000124353	yes	1.81583
Ccdc85c	5.18365	2.70334	-0.939225	-2.73669	5e-05	0.000124353	yes	0.521513
Ccdc88a	5.36556	12.7025	1.24331	6.41615	5e-05	0.000124353	yes	2.36741
Ccdc88c	6.43456	0.0795165	-6.33844	-10.5177	5e-05	0.000124353	yes	0.0123578
Ccdc92	6.11886	4.55187	-0.426804	-1.57792	0.006	0.0109863	yes	0.743908
Ccdc93	10.2628	16.7306	0.705064	3.74633	5e-05	0.000124353	yes	1.63022
Ccdc97	32.7878	19.0267	-0.785133	-4.08851	5e-05	0.000124353	yes	0.580298
Cchcr1	5.70021	10.446	0.873865	3.70678	5e-05	0.000124353	yes	1.83257
Cck	4.33723	0	#NAME?	#NAME?	5e-05	0.000124353	yes	#NAME?
Ccl11	4.76533	0.158902	-4.90637	-5.04626	0.0008	0.00170331	yes	0.0333454
Ccl2	29.1405	8.17327	-1.83404	-5.97358	5e-05	0.000124353	yes	0.280478
Ccl7	90.6411	37.7141	-1.26506	-5.5767	5e-05	0.000124353	yes	0.416082
Ccl8	123.77	27.9148	-2.14856	-8.50147	5e-05	0.000124353	yes	0.225538
Ccnd1	4.25508	7.11874	0.742436	3.16101	5e-05	0.000124353	yes	1.673
Ccnd2	7.13589	49.5398	2.79542	14.193	5e-05	0.000124353	yes	6.94233
Ccnd3	169.582	23.6619	-2.84135	-10.3716	5e-05	0.000124353	yes	0.13953
Ccndbp1	69.7764	26.5455	-1.39427	-7.06289	5e-05	0.000124353	yes	0.380437
Ccnf	2.33614	3.64564	0.642048	2.21202	0.0001	0.000241206	yes	1.56054
Ccng1	51.3068	39.1648	-0.389594	-2.08948	0.00015	0.000354026	yes	0.763344
Ccng2	21.016	8.83732	-1.24981	-5.81981	5e-05	0.000124353	yes	0.420504
Ccni	83.8478	124.804	0.573822	3.04885	5e-05	0.000124353	yes	1.48846
Ccnk	17.6876	22.6902	0.359331	1.81915	0.00115	0.00238543	yes	1.28283
Ccnl1	16.8255	26.1947	0.638628	3.14445	5e-05	0.000124353	yes	1.55685
Ccnl2	38.542	28.6714	-0.426822	-2.22483	0.00015	0.000354026	yes	0.743899
Ccno	0.395794	1.57295	1.99065	3.40455	5e-05	0.000124353	yes	3.97416
Ccny	45.1536	38.1445	-0.243366	-1.30878	0.0225	0.0368842	yes	0.844772
Ccp110	3.23267	5.0027	0.629981	2.69844	5e-05	0.000124353	yes	1.54754
Ccpg1	38.3867	31.8857	-0.2677	-1.33882	0.01945	0.0323245	yes	0.830643
Ccpg1os	9.73651	5.47232	-0.831252	-2.22705	0.0007	0.00150227	yes	0.562041
Ccr10	0.518189	1.04456	1.01135	1.74091	0.0045	0.00842637	yes	2.0158
Ccrn4l	3.85768	6.07355	0.654804	2.58198	5e-05	0.000124353	yes	1.5744
Ccsap	1.15806	0.461943	-1.32593	-2.67485	5e-05	0.000124353	yes	0.398892
Ccser1	0.80807	1.4356	0.8291	2.50052	5e-05	0.000124353	yes	1.77658
Ccser2	19.6093	15.612	-0.328887	-1.71214	0.00285	0.00555134	yes	0.79615
Cct2	231.394	349.061	0.593125	3.01056	5e-05	0.000124353	yes	1.50851
Cct4	188.904	251.731	0.414233	2.14935	0.0003	0.000679963	yes	1.33259
Cct6a	118.676	181.095	0.609714	3.21239	5e-05	0.000124353	yes	1.52596
Cct7	146.997	189.709	0.367999	1.89898	0.00085	0.00180327	yes	1.29056
Ccz1	30.7342	36.944	0.265496	1.35679	0.0202	0.0334589	yes	1.20205
Cd109	9.24146	16.5378	0.839577	4.35231	5e-05	0.000124353	yes	1.78953
Cd14	6.2929	23.892	1.92473	7.672	5e-05	0.000124353	yes	3.79666
Cd151	87.2569	128.599	0.559534	3.00502	5e-05	0.000124353	yes	1.47379
Cd164	338.32	209.259	-0.693101	-3.39112	5e-05	0.000124353	yes	0.618523
Cd1d1	1.91306	3.28671	0.780759	2.13888	0.0003	0.000679963	yes	1.71803
Cd200	115.185	73.526	-0.647627	-3.46476	5e-05	0.000124353	yes	0.638329
Cd248	3.82766	1.19627	-1.67791	-4.77539	5e-05	0.000124353	yes	0.312535
Cd24a	30.6112	0.15468	-7.62863	-9.45422	5e-05	0.000124353	yes	0.00505305
Cd276	15.2414	18.1207	0.249644	1.26631	0.02685	0.0434294	yes	1.18891
Cd28	3.01961	5.37106	0.830844	3.33536	5e-05	0.000124353	yes	1.77873
Cd2ap	7.78415	16.0598	1.04485	5.32001	5e-05	0.000124353	yes	2.06315
Cd2bp2	32.4597	27.1101	-0.259823	-1.37593	0.018	0.0301166	yes	0.83519
Cd300lb	0.619251	0.239915	-1.368	-2.15496	0.00145	0.0029675	yes	0.387428
Cd302	5.23404	0.252229	-4.37512	-4.74661	5e-05	0.000124353	yes	0.0481901
Cd33	0.214835	0.848192	1.98116	2.91504	0.0001	0.000241206	yes	3.9481
Cd34	9.27877	19.1776	1.04742	4.84152	5e-05	0.000124353	yes	2.06683
Cd3eap	11.1762	8.3325	-0.423604	-1.46068	0.01165	0.0202009	yes	0.74556
Cd40	0.755323	2.63288	1.80148	3.5776	5e-05	0.000124353	yes	3.48578
Cd46	0.277779	0.748671	1.43039	1.6923	0.01275	0.0219853	yes	2.6952
Cd59a	8.54682	6.59357	-0.374327	-1.4215	0.0133	0.0228574	yes	0.771465
Cd80	14.8805	10.023	-0.570113	-2.41101	5e-05	0.000124353	yes	0.673564
Cd81	278.008	121.447	-1.19481	-6.26712	5e-05	0.000124353	yes	0.436844
Cd82	118.824	18.4072	-2.69048	-13.4735	5e-05	0.000124353	yes	0.154912
Cd9	178.724	295.098	0.723462	3.79615	5e-05	0.000124353	yes	1.65114
Cd99l2	99.7474	52.8186	-0.917233	-4.8774	5e-05	0.000124353	yes	0.529524
Cda	3.56463	12.635	1.8256	4.84126	5e-05	0.000124353	yes	3.54454
Cdadc1	22.1665	13.6974	-0.694477	-3.27373	5e-05	0.000124353	yes	0.617933
Cdc14a	1.15992	2.30891	0.993185	3.19536	5e-05	0.000124353	yes	1.99057
Cdc14b	5.23064	7.56539	0.532427	2.49026	5e-05	0.000124353	yes	1.44636
Cdc23	15.6264	20.2413	0.373314	1.30544	0.0229	0.0374557	yes	1.29532
Cdc25a	4.88827	6.06092	0.310214	1.3219	0.02095	0.0345856	yes	1.23989
Cdc25b	10.9761	2.40739	-2.18883	-1.66214	0.0222	0.0364502	yes	0.219329
Cdc26	33.9608	25.2419	-0.428049	-1.80549	0.00205	0.00408484	yes	0.743266
Cdc34	139.315	63.1641	-1.14117	-6.04117	5e-05	0.000124353	yes	0.453392
Cdc37l1	29.1791	21.0887	-0.468463	-1.67477	0.00315	0.00607556	yes	0.722734
Cdc42	241.619	181.403	-0.413535	-2.1311	0.00025	0.000572921	yes	0.750781
Cdc42bpb	22.4747	30.3563	0.43369	2.32878	5e-05	0.000124353	yes	1.35068
Cdc42bpg	5.55508	2.46734	-1.17085	-5.0367	5e-05	0.000124353	yes	0.44416
Cdc42ep2	34.8724	16.7503	-1.0579	-4.90184	5e-05	0.000124353	yes	0.480331
Cdc42ep3	58.8571	42.8355	-0.45841	-2.42827	5e-05	0.000124353	yes	0.727788
Cdc42ep4	10.477	14.0107	0.419297	2.00746	0.0006	0.00130094	yes	1.33728
Cdc42ep5	8.49803	4.92975	-0.785615	-2.20193	0.0002	0.000464606	yes	0.580105
Cdc42se1	37.6995	28.0897	-0.424501	-1.50072	0.0103	0.0180494	yes	0.745096
Cdc42se2	31.1667	23.8756	-0.384465	-2.02203	0.0003	0.000679963	yes	0.766063
Cdc45	3.66373	2.61637	-0.485748	-1.45798	0.01195	0.0206864	yes	0.714127
Cdc7	0.943797	2.27095	1.26675	3.3636	5e-05	0.000124353	yes	2.40619
Cdca4	6.39898	9.13271	0.513201	2.13248	0.0005	0.00109639	yes	1.42721
Cdca7	2.79847	8.64448	1.62714	5.78935	5e-05	0.000124353	yes	3.089
Cdca7l	1.86876	7.03962	1.91341	6.02672	5e-05	0.000124353	yes	3.76698
Cdh10	0.262617	26.1083	6.63541	13.9971	5e-05	0.000124353	yes	99.4163
Cdh11	9.07023	0.698718	-3.69836	-11.3592	5e-05	0.000124353	yes	0.077034
Cdh13	252.327	15.1771	-4.05533	-19.8882	5e-05	0.000124353	yes	0.0601484
Cdh15	88.8776	7.38825	-3.58852	-16.7707	5e-05	0.000124353	yes	0.0831281
Cdh2	60.3784	4.68003	-3.68945	-17.5476	5e-05	0.000124353	yes	0.0775113
Cdh23	1.75568	0.848093	-1.04974	-2.58091	5e-05	0.000124353	yes	0.483055
Cdk11b	52.4951	43.4014	-0.274442	-1.46801	0.01045	0.0182941	yes	0.82677
Cdk13	8.37555	11.1632	0.414493	2.15354	0.00025	0.000572921	yes	1.33283
Cdk14	8.92949	13.4755	0.593689	3.01358	5e-05	0.000124353	yes	1.5091
Cdk15	1.02135	16.0764	3.9764	9.59104	5e-05	0.000124353	yes	15.7404
Cdk16	78.4589	55.4795	-0.499981	-2.67837	5e-05	0.000124353	yes	0.707116
Cdk19	8.11214	12.3959	0.611705	3.12121	5e-05	0.000124353	yes	1.52806
Cdk2	29.5832	11.1201	-1.4116	-6.8053	5e-05	0.000124353	yes	0.375895
Cdk2ap1	146.922	85.4311	-0.782217	-4.18093	5e-05	0.000124353	yes	0.581473
Cdk2ap2	107.75	183.952	0.771639	4.08794	5e-05	0.000124353	yes	1.70721
Cdk3-ps	0.249454	0.643284	1.36668	1.63879	0.01185	0.0205219	yes	2.57876
Cdk4	129.228	233.916	0.856071	4.57252	5e-05	0.000124353	yes	1.8101
Cdk5	24.3878	18.9638	-0.362917	-1.78773	0.0016	0.00324768	yes	0.777591
Cdk5r1	3.80817	0.605755	-2.65229	-7.47779	5e-05	0.000124353	yes	0.159067
Cdk5rap1	11.1316	7.64246	-0.542553	-2.23866	0.00025	0.000572921	yes	0.686555
Cdk5rap3	34.6618	28.499	-0.282438	-1.47804	0.00955	0.0168542	yes	0.8222
Cdk7	7.27502	9.56661	0.395057	2.04456	0.0004	0.000888268	yes	1.31499
Cdk8	9.43106	19.1371	1.02088	4.81199	5e-05	0.000124353	yes	2.02916
Cdkal1	9.57941	7.5277	-0.347727	-1.51126	0.0087	0.0154775	yes	0.785821
Cdkl3	4.28668	7.27554	0.763192	2.83691	5e-05	0.000124353	yes	1.69724
Cdkn1a	649.015	93.8711	-2.7895	-13.5792	5e-05	0.000124353	yes	0.144636
Cdkn1c	0.777565	0	#NAME?	#NAME?	5e-05	0.000124353	yes	#NAME?
Cdkn2aip	4.91583	7.03344	0.516795	2.2183	0.00015	0.000354026	yes	1.43077
Cdkn2aipnl	8.28249	14.8352	0.840887	3.55012	5e-05	0.000124353	yes	1.79115
Cdkn2c	19.4552	13.4454	-0.533041	-2.12988	0.00025	0.000572921	yes	0.691096
Cdkn2d	26.3334	8.92439	-1.56107	-6.28142	5e-05	0.000124353	yes	0.3389
Cdnf	7.38469	2.14698	-1.78223	-6.41784	5e-05	0.000124353	yes	0.290734
Cdon	58.9894	11.2917	-2.38519	-12.4175	5e-05	0.000124353	yes	0.19142
Cdr2	12.2127	6.18758	-0.980931	-4.19176	5e-05	0.000124353	yes	0.506653
Cdr2l	6.59842	47.4498	2.84621	13.8194	5e-05	0.000124353	yes	7.19109
Cds2	49.1249	21.0521	-1.22249	-5.72016	5e-05	0.000124353	yes	0.428542
Cdsn	4.40582	6.36	0.529614	1.98265	0.00085	0.00180327	yes	1.44354
Cdt1	6.01243	57.0331	3.24578	14.2689	5e-05	0.000124353	yes	9.48587
Cdv3	118.656	47.5528	-1.31918	-6.83583	5e-05	0.000124353	yes	0.400763
Cdyl	5.01377	6.14555	0.293646	1.24818	0.02925	0.0469014	yes	1.22573
Cdyl2	0.93112	0	#NAME?	#NAME?	5e-05	0.000124353	yes	#NAME?
Cebpa	8.87052	5.83015	-0.605484	-2.51761	5e-05	0.000124353	yes	0.657251
Cebpd	3.48773	1.78924	-0.96294	-1.75124	0.0033	0.00633334	yes	0.51301
Cebpg	19.8339	29.5257	0.574001	3.0499	5e-05	0.000124353	yes	1.48865
Cebpz	14.6284	27.1941	0.894523	4.35936	5e-05	0.000124353	yes	1.859
Cecr5	11.5597	19.8411	0.779391	3.53879	5e-05	0.000124353	yes	1.71641
Celf1	42.1749	27.6991	-0.606547	-3.10412	5e-05	0.000124353	yes	0.656767
Celf2	28.6298	7.76001	-1.88339	-9.82364	5e-05	0.000124353	yes	0.271046
Cemip	6.20137	3.79254	-0.709421	-3.37756	5e-05	0.000124353	yes	0.611566
Cenpb	106.541	72.1534	-0.562274	-2.07828	0.00025	0.000572921	yes	0.677234
Cenpc1	6.64202	8.60645	0.373796	1.66265	0.00385	0.00729852	yes	1.29576
Cenpj	2.02499	1.19838	-0.756827	-2.39887	5e-05	0.000124353	yes	0.591796
Cenpm	0.34422	0.979998	1.50945	1.53865	0.0022	0.00436689	yes	2.84701
Cenpq	3.9655	2.67477	-0.568086	-1.56168	0.0075	0.0135074	yes	0.674511
Cenpt	3.51317	4.72466	0.427437	1.35632	0.0193	0.0320968	yes	1.34484
Cenpv	7.93674	17.719	1.15868	4.12982	5e-05	0.000124353	yes	2.23253
Cenpw	1.35313	2.11896	0.647058	1.44531	0.0142	0.0242729	yes	1.56597
Cep104	35.3904	16.8889	-1.06728	-5.5657	5e-05	0.000124353	yes	0.477218
Cep112	0.862746	0.274061	-1.65444	-2.20657	5e-05	0.000124353	yes	0.317661
Cep126	0.319889	0.648439	1.0194	1.96726	0.0016	0.00324768	yes	2.02708
Cep128	0.804549	1.36593	0.763631	2.20476	0.0003	0.000679963	yes	1.69776
Cep131	6.17296	4.60953	-0.421341	-1.77295	0.0018	0.00362044	yes	0.74673
Cep170	19.8028	30.7814	0.636352	3.41468	5e-05	0.000124353	yes	1.55439
Cep19	14.866	10.8524	-0.454005	-1.94237	0.001	0.00209567	yes	0.730013
Cep192	2.37259	3.40573	0.521499	2.30533	5e-05	0.000124353	yes	1.43545
Cep350	7.11731	5.01092	-0.506256	-2.66161	5e-05	0.000124353	yes	0.704047
Cep57	7.20694	11.1361	0.627789	2.74557	5e-05	0.000124353	yes	1.5452
Cep57l1	4.7449	7.31133	0.623755	2.26521	0.0001	0.000241206	yes	1.54088
Cep63	9.59481	5.08356	-0.916414	-3.61898	5e-05	0.000124353	yes	0.529824
Cep70	2.31107	3.73705	0.693334	2.24724	5e-05	0.000124353	yes	1.61702
Cep76	5.70365	3.29809	-0.790255	-3.2475	5e-05	0.000124353	yes	0.578242
Cep78	4.36326	6.16811	0.499422	1.91515	0.00065	0.001402	yes	1.41365
Cep83	10.9101	14.0277	0.362611	1.74482	0.0024	0.00472905	yes	1.28575
Cep83os	2.94465	6.65707	1.17679	4.86082	5e-05	0.000124353	yes	2.26073
Cep85l	4.69853	8.94749	0.929275	3.5113	5e-05	0.000124353	yes	1.90432
Cept1	15.8535	23.8019	0.586274	2.00283	0.0011	0.00229091	yes	1.50136
Cercam	12.4685	4.6633	-1.41886	-5.94768	5e-05	0.000124353	yes	0.374008
Cerk	22.8759	11.2097	-1.02908	-5.31446	5e-05	0.000124353	yes	0.490023
Cers1	4.52961	0.660894	-2.7769	-2.07756	0.00785	0.0140642	yes	0.145905
Cers2	72.932	207.824	1.51074	6.73144	5e-05	0.000124353	yes	2.84956
Cers5	47.2209	34.821	-0.439466	-2.30752	5e-05	0.000124353	yes	0.737408
Cers6	11.9908	5.56779	-1.10675	-5.15864	5e-05	0.000124353	yes	0.464339
Ces1a	0.809654	0.106076	-2.9322	-3.13925	0.00065	0.001402	yes	0.131015
Ces2c	1.20141	0.038192	-4.97531	-2.84304	0.00905	0.0160495	yes	0.0317894
Ces2g	0.839311	0	#NAME?	#NAME?	5e-05	0.000124353	yes	#NAME?
Cetn2	39.7519	30.6013	-0.37743	-1.81891	0.00155	0.0031529	yes	0.769808
Cetn3	28.283	37.7594	0.416904	1.91431	0.001	0.00209567	yes	1.33506
Cetn4	3.36225	1.94072	-0.79283	-1.76241	0.00325	0.00624609	yes	0.577211
Cfap36	45.438	30.6595	-0.567566	-2.87352	5e-05	0.000124353	yes	0.674754
Cfap52	5.41523	0.216299	-4.64592	-7.44231	5e-05	0.000124353	yes	0.0399428
Cfap69	3.24709	2.2744	-0.513659	-1.76255	0.0023	0.00455081	yes	0.700444
Cfap74	1.15013	2.13269	0.890877	2.30938	0.00015	0.000354026	yes	1.8543
Cfap97	8.9646	10.8879	0.280413	1.39451	0.01555	0.0263805	yes	1.21454
Cfb	0.876501	0.0916808	-3.25706	-3.54847	0.0001	0.000241206	yes	0.104599
Cfdp1	52.4271	98.6121	0.911453	4.74731	5e-05	0.000124353	yes	1.88094
Cfh	39.8951	63.1009	0.661448	3.52789	5e-05	0.000124353	yes	1.58167
Cfl1	291.71	450.759	0.627822	3.28029	5e-05	0.000124353	yes	1.54523
Cfl2	249.555	124.725	-1.0006	-5.07126	5e-05	0.000124353	yes	0.499792
Cflar	10.4309	12.9877	0.316276	1.51576	0.0085	0.0151412	yes	1.24511
Cggbp1	15.511	28.2364	0.864271	4.56038	5e-05	0.000124353	yes	1.82042
Cgref1	21.455	13.9301	-0.623113	-2.669	5e-05	0.000124353	yes	0.649268
Cgrrf1	29.8158	18.9369	-0.654873	-2.93586	5e-05	0.000124353	yes	0.635131
Chac1	48.0352	68.0351	0.502187	2.61869	5e-05	0.000124353	yes	1.41636
Chaf1a	1.91885	2.81222	0.551467	1.81947	0.0018	0.00362044	yes	1.46558
Chaf1b	0.590882	0.972591	0.718962	1.32383	0.02745	0.0442843	yes	1.646
Champ1	15.6494	24.0271	0.618556	3.23682	5e-05	0.000124353	yes	1.53534
Chchd1	70.6283	50.6981	-0.478314	-2.12663	0.0002	0.000464606	yes	0.717816
Chchd10	24.3956	40.2828	0.72354	3.01443	5e-05	0.000124353	yes	1.65123
Chchd3	72.4491	86.4344	0.254639	1.35453	0.01605	0.0271841	yes	1.19304
Chchd4	21.8014	33.0559	0.600492	2.78655	5e-05	0.000124353	yes	1.51623
Chchd6	8.69756	12.5405	0.527909	1.89189	0.0011	0.00229091	yes	1.44184
Chchd7	20.076	28.5114	0.506067	1.78467	0.00215	0.00427312	yes	1.42017
Chd1	9.87585	14.3003	0.534065	2.83172	5e-05	0.000124353	yes	1.448
Chd3	59.3117	31.2894	-0.922641	-4.84789	5e-05	0.000124353	yes	0.527542
Chd3os	1.97832	5.23658	1.40435	4.04514	5e-05	0.000124353	yes	2.64698
Chd4	106.77	57.5982	-0.890405	-4.51659	5e-05	0.000124353	yes	0.539463
Chd7	4.19549	3.29682	-0.347762	-1.71609	0.0036	0.00685288	yes	0.785802
Chek1	0.470938	0.840957	0.836493	1.78309	0.004	0.00755745	yes	1.7857
Chek2	1.86618	3.75058	1.00703	3.00626	5e-05	0.000124353	yes	2.00977
Chfr	17.4326	10.1435	-0.781234	-3.7601	5e-05	0.000124353	yes	0.581869
Chic1	1.02508	3.29918	1.68638	6.38946	5e-05	0.000124353	yes	3.21848
Chic2	12.5464	22.0791	0.815401	3.97874	5e-05	0.000124353	yes	1.75979
Chil1	1.492	0.161979	-3.20337	-3.92013	5e-05	0.000124353	yes	0.108565
Chka	12.9544	25.9193	1.00059	4.92843	5e-05	0.000124353	yes	2.00082
Chm	9.06085	7.19221	-0.333212	-1.62855	0.0039	0.00738427	yes	0.793767
Chml	4.81546	2.92545	-0.719013	-2.87147	5e-05	0.000124353	yes	0.607513
Chmp1a	71.0667	56.188	-0.338913	-1.81669	0.00155	0.0031529	yes	0.790637
Chmp2a	104.528	87.9635	-0.248913	-1.30324	0.02095	0.0345856	yes	0.84153
Chmp5	82.2232	61.3316	-0.422914	-2.23655	5e-05	0.000124353	yes	0.745916
Chn1	21.1434	4.07166	-2.37652	-10.6101	5e-05	0.000124353	yes	0.192573
Chn2	3.84337	8.6678	1.17329	4.70446	5e-05	0.000124353	yes	2.25525
Chp1	63.4143	99.1191	0.644354	3.45097	5e-05	0.000124353	yes	1.56304
Chpf	32.4462	44.7177	0.462794	2.47917	5e-05	0.000124353	yes	1.37821
Chpt1	60.0179	29.2898	-1.035	-4.87616	5e-05	0.000124353	yes	0.488016
Chrd	11.8247	0.299059	-5.30523	-9.86211	5e-05	0.000124353	yes	0.025291
Chrdl1	5.81457	0.144167	-5.33386	-9.63754	5e-05	0.000124353	yes	0.0247941
Chrna1	578.554	88.8795	-2.70253	-11.8212	5e-05	0.000124353	yes	0.153623
Chrna10	0.685139	0	#NAME?	#NAME?	5e-05	0.000124353	yes	#NAME?
Chrnb1	117.5	10.1943	-3.52682	-16.7415	5e-05	0.000124353	yes	0.0867604
Chrnb2	0.825641	1.89502	1.19863	1.68118	0.00505	0.00938257	yes	2.29522
Chrnd	366.702	130.055	-1.49549	-7.32831	5e-05	0.000124353	yes	0.35466
Chrng	801.415	11.2522	-6.15428	-26.6054	5e-05	0.000124353	yes	0.0140403
Chst1	4.6434	3.35992	-0.466755	-1.6588	0.00365	0.00694273	yes	0.72359
Chst10	0.23628	1.69149	2.83972	5.22227	5e-05	0.000124353	yes	7.15881
Chst11	11.8282	34.0143	1.52391	8.02941	5e-05	0.000124353	yes	2.87569
Chst12	14.4771	11.7283	-0.303771	-1.31881	0.02135	0.0351944	yes	0.810132
Chst15	9.49095	3.68154	-1.36624	-5.99471	5e-05	0.000124353	yes	0.387901
Chst2	1.61508	5.06518	1.64901	6.70177	5e-05	0.000124353	yes	3.13618
Chst3	1.38081	2.15345	0.641134	2.32598	0.0002	0.000464606	yes	1.55955
Chst8	0.0824663	1.2061	3.8704	4.19267	0.00025	0.000572921	yes	14.6254
Chsy1	9.65914	12.7313	0.398407	1.98742	0.00055	0.00119777	yes	1.31805
Chtf8	33.4916	50.4276	0.590414	3.15384	5e-05	0.000124353	yes	1.50568
Ciao1	20.8513	14.8058	-0.493976	-2.5101	5e-05	0.000124353	yes	0.710065
Ciapin1	12.3265	17.9652	0.543446	2.80941	5e-05	0.000124353	yes	1.45745
Ciart	3.77782	8.60757	1.18805	3.38542	5e-05	0.000124353	yes	2.27845
Cib1	42.8139	26.3302	-0.701361	-3.25892	5e-05	0.000124353	yes	0.614992
Cib2	13.6234	0.415685	-5.03446	-6.14487	5e-05	0.000124353	yes	0.0305124
Cic	23.455	28.6139	0.286821	1.50958	0.0094	0.0166297	yes	1.21995
Cideb	1.01755	4.14179	2.02516	1.684	0.02155	0.0355005	yes	4.07037
Cilp	22.7305	0.0473531	-8.90696	-10.0873	5e-05	0.000124353	yes	0.00208323
Cinp	16.5216	13.4972	-0.291687	-1.35468	0.01695	0.0285719	yes	0.816946
Cipc	23.2224	15.4467	-0.588224	-3.08542	5e-05	0.000124353	yes	0.665161
Cir1	39.8124	26.2856	-0.598945	-3.07393	5e-05	0.000124353	yes	0.660237
Cirh1a	28.094	46.6471	0.731527	3.82984	5e-05	0.000124353	yes	1.6604
Cisd1	107.747	66.0958	-0.705011	-3.653	5e-05	0.000124353	yes	0.613438
Cit	0.68209	0.184485	-1.88646	-4.02636	5e-05	0.000124353	yes	0.27047
Ckap5	22.0748	14.7913	-0.577653	-3.07673	5e-05	0.000124353	yes	0.670053
Ckb	19.51	0.869212	-4.48836	-10.3517	5e-05	0.000124353	yes	0.0445522
Ckm	302.445	1.49397	-7.66138	-20.6949	5e-05	0.000124353	yes	0.00493963
Ckmt2	5.59188	0.0747407	-6.22529	-5.37914	0.0078	0.0139888	yes	0.013366
Cks1b	7.91752	20.7359	1.38901	4.48639	5e-05	0.000124353	yes	2.61899
Clasp1	31.0387	18.8321	-0.720879	-3.86641	5e-05	0.000124353	yes	0.606728
Clasp2	7.55069	5.27553	-0.517292	-2.40733	5e-05	0.000124353	yes	0.698682
Clasrp	13.4743	17.8883	0.408807	1.92921	0.00115	0.00238543	yes	1.32759
Clca1	1.15573	0.111491	-3.3738	-4.43462	5e-05	0.000124353	yes	0.0964684
Clca2	1.30511	0.0480657	-4.76302	-5.0897	5e-05	0.000124353	yes	0.0368288
Clca3b	1.3982	0.147824	-3.24163	-5.0577	5e-05	0.000124353	yes	0.105724
Clca4a	12.1696	0.49512	-4.61936	-11.4036	5e-05	0.000124353	yes	0.040685
Clca4b	6.5081	0.458931	-3.82589	-9.09459	5e-05	0.000124353	yes	0.0705168
Clcc1	20.1023	15.4767	-0.377266	-1.32532	0.02175	0.0357967	yes	0.769895
Clcn1	0.844251	0.145457	-2.53708	-3.90949	5e-05	0.000124353	yes	0.172291
Clcn3	9.12588	14.2882	0.646794	3.31858	5e-05	0.000124353	yes	1.56569
Clcn5	14.2673	12.0243	-0.246767	-1.24812	0.02975	0.0476169	yes	0.842783
Clcn6	9.39999	12.5251	0.414087	1.9383	0.00065	0.001402	yes	1.33246
Cldn15	1.57475	0.225418	-2.80445	-4.02643	5e-05	0.000124353	yes	0.143145
Cldn2	5.65915	0.327669	-4.11027	-8.72784	5e-05	0.000124353	yes	0.0579009
Cldnd1	40.5642	80.0726	0.9811	5.15985	5e-05	0.000124353	yes	1.97397
Clec16a	17.0864	10.0206	-0.769881	-4.02621	5e-05	0.000124353	yes	0.586466
Clec3b	0.853169	0.186688	-2.19221	-2.06425	0.0104	0.0182118	yes	0.218816
Clic1	151.923	239.456	0.656423	3.51935	5e-05	0.000124353	yes	1.57617
Clic3	8.66302	0.373919	-4.53407	-5.49528	5e-05	0.000124353	yes	0.0431627
Clic5	18.6795	0.594365	-4.97397	-16.3517	5e-05	0.000124353	yes	0.0318189
Clip1	57.5691	26.4005	-1.12473	-5.9977	5e-05	0.000124353	yes	0.458588
Clip2	6.86826	11.0401	0.684734	3.36691	5e-05	0.000124353	yes	1.60741
Clip3	7.51334	2.67449	-1.49019	-5.74505	5e-05	0.000124353	yes	0.355966
Clip4	16.0178	8.38752	-0.933361	-4.27697	5e-05	0.000124353	yes	0.523637
Clk1	38.875	51.1849	0.396875	1.95527	0.00045	0.000992722	yes	1.31665
Clk4	20.8851	25.0489	0.262278	1.2823	0.0247	0.0401983	yes	1.19937
Clmn	4.68769	3.3516	-0.484026	-2.40538	5e-05	0.000124353	yes	0.71498
Clmp	7.06388	24.8538	1.81493	8.48298	5e-05	0.000124353	yes	3.51843
Cln3	0.767112	0.298559	-1.36142	-2.27913	0.00055	0.00119777	yes	0.389199
Cln5	31.1299	45.4539	0.546103	2.88196	5e-05	0.000124353	yes	1.46014
Cln8	17.0036	35.143	1.0474	5.5902	5e-05	0.000124353	yes	2.0668
Clns1a	10.8379	13.6541	0.333256	1.63369	0.00445	0.00834409	yes	1.25985
Clpb	16.8234	12.9474	-0.377814	-1.9627	0.0006	0.00130094	yes	0.769603
Clpp	32.166	65.4253	1.02431	5.10579	5e-05	0.000124353	yes	2.03399
Clpx	21.2879	16.4923	-0.368235	-1.87602	0.0018	0.00362044	yes	0.77473
Clstn1	49.1795	73.3395	0.576531	3.07212	5e-05	0.000124353	yes	1.49126
Clta	84.891	143.174	0.754082	4.01332	5e-05	0.000124353	yes	1.68656
Cltb	59.4173	23.0951	-1.3633	-6.79071	5e-05	0.000124353	yes	0.388692
Cltc	77.873	120.405	0.628696	2.16374	0.00015	0.000354026	yes	1.54617
Clu	1.27212	22.8906	4.16945	11.4717	5e-05	0.000124353	yes	17.9941
Cluap1	13.1958	21.7401	0.72028	3.21626	5e-05	0.000124353	yes	1.6475
Cluh	39.6332	57.3977	0.534284	2.84975	5e-05	0.000124353	yes	1.44822
Clybl	16.4087	26.6542	0.699902	3.08087	5e-05	0.000124353	yes	1.62439
Cmah	1.34303	0.127697	-3.39469	-7.44501	5e-05	0.000124353	yes	0.0950816
Cmbl	18.6981	1.83542	-3.34871	-8.33144	5e-05	0.000124353	yes	0.0981607
Cmklr1	3.20418	0	#NAME?	#NAME?	5e-05	0.000124353	yes	#NAME?
Cmpk1	24.3172	30.7138	0.336905	1.6922	0.0031	0.00598657	yes	1.26304
Cmss1	4.62514	17.0473	1.88198	1.56038	0.02005	0.0332282	yes	3.68581
Cmtm3	14.8983	57.9915	1.96069	9.37127	5e-05	0.000124353	yes	3.89248
Cmtm4	7.27539	16.6153	1.19142	6.24176	5e-05	0.000124353	yes	2.28377
Cmtm7	14.5715	24.0249	0.72138	3.02046	5e-05	0.000124353	yes	1.64876
Cmtr2	3.72017	6.56168	0.818694	3.37265	5e-05	0.000124353	yes	1.76381
Cnbd2	2.35131	4.92591	1.06692	2.59232	5e-05	0.000124353	yes	2.09496
Cnbp	165.621	225.269	0.443765	2.30589	5e-05	0.000124353	yes	1.36015
Cndp2	12.7638	19.051	0.577811	2.71394	5e-05	0.000124353	yes	1.49258
Cnih4	20.1071	29.11	0.533809	2.79453	5e-05	0.000124353	yes	1.44775
Cnksr1	4.08991	0.0889969	-5.52217	-6.13022	5e-05	0.000124353	yes	0.0217601
Cnksr3	25.9991	15.0347	-0.790162	-4.08641	5e-05	0.000124353	yes	0.578279
Cnn3	365.478	155.696	-1.23106	-6.28639	5e-05	0.000124353	yes	0.426004
Cnnm4	13.907	9.92986	-0.485967	-2.47159	5e-05	0.000124353	yes	0.714018
Cnot1	24.5158	28.7783	0.231271	1.2439	0.02995	0.0478876	yes	1.17387
Cnot2	34.2173	46.6698	0.447766	2.35986	5e-05	0.000124353	yes	1.36393
Cnot4	13.1845	9.01773	-0.548004	-2.5635	5e-05	0.000124353	yes	0.683966
Cnot6	10.0037	15.8074	0.660071	3.43575	5e-05	0.000124353	yes	1.58016
Cnot6l	21.4483	8.86378	-1.27487	-6.75394	5e-05	0.000124353	yes	0.413262
Cnp	10.2792	3.172	-1.69626	-6.25191	5e-05	0.000124353	yes	0.308585
Cnpy3	32.467	50.4897	0.637016	3.32259	5e-05	0.000124353	yes	1.55511
Cnpy4	19.0389	25.139	0.400972	1.93053	0.00095	0.001999	yes	1.3204
Cnrip1	0.792512	1.59372	1.0079	1.93958	0.00185	0.00371498	yes	2.01098
Cntfr	1.27894	0.598669	-1.09512	-1.79481	0.00075	0.00160485	yes	0.468097
Cntln	2.30337	4.54732	0.981273	4.04392	5e-05	0.000124353	yes	1.97421
Cntn5	0	0.651069	inf	#NAME?	5e-05	0.000124353	yes	#VALUE!
Cntnap1	1.49227	2.77233	0.893593	3.25232	5e-05	0.000124353	yes	1.8578
Cntrl	2.68575	1.94257	-0.467358	-1.69482	0.0042	0.00790881	yes	0.723288
Coa3	70.7234	49.3317	-0.519672	-2.46256	5e-05	0.000124353	yes	0.69753
Coa4	6.20705	3.40687	-0.865459	-2.12299	0.00015	0.000354026	yes	0.548872
Coa5	42.768	52.5062	0.295954	1.59068	0.00495	0.00921335	yes	1.2277
Coa7	3.54453	5.2001	0.552946	2.08681	0.0004	0.000888268	yes	1.46708
Coasy	16.9861	12.3557	-0.459171	-2.12558	0.00025	0.000572921	yes	0.727404
Cobl	19.0259	2.22763	-3.09438	-13.5579	5e-05	0.000124353	yes	0.117084
Cog3	16.4508	21.0701	0.357042	1.87733	0.001	0.00209567	yes	1.2808
Cog4	56.137	38.6727	-0.537635	-2.87742	5e-05	0.000124353	yes	0.688899
Cog6	37.5767	23.1064	-0.701549	-3.69065	5e-05	0.000124353	yes	0.614912
Cog7	15.9294	13.1157	-0.2804	-1.37785	0.017	0.0286445	yes	0.823363
Coil	3.11363	5.24198	0.751513	2.69055	5e-05	0.000124353	yes	1.68356
Col11a2	2.95394	8.52856	1.52966	6.82695	5e-05	0.000124353	yes	2.88718
Col12a1	42.0879	0.887199	-5.568	-23.3664	5e-05	0.000124353	yes	0.0210797
Col13a1	1.60719	0	#NAME?	#NAME?	5e-05	0.000124353	yes	#NAME?
Col16a1	4.34992	3.01596	-0.528375	-2.21909	0.0001	0.000241206	yes	0.693335
Col18a1	3.64772	0.639995	-2.51086	-7.60433	5e-05	0.000124353	yes	0.175451
Col1a1	109.195	31.3316	-1.80121	-9.37703	5e-05	0.000124353	yes	0.286934
Col1a2	272.889	139.055	-0.972663	-4.49473	5e-05	0.000124353	yes	0.509565
Col24a1	1.262	0.396882	-1.66893	-4.59666	5e-05	0.000124353	yes	0.314487
Col4a1	45.1016	0.893817	-5.65706	-21.1425	5e-05	0.000124353	yes	0.0198178
Col4a2	44.6194	1.08679	-5.35952	-20.884	5e-05	0.000124353	yes	0.024357
Col4a3bp	18.3537	10.6131	-0.790231	-4.12786	5e-05	0.000124353	yes	0.578251
Col4a5	10.1394	7.66672	-0.403293	-2.0571	0.0004	0.000888268	yes	0.75613
Col5a1	90.2886	25.2293	-1.83944	-9.32826	5e-05	0.000124353	yes	0.27943
Col5a2	136.605	69.3245	-0.978577	-4.83432	5e-05	0.000124353	yes	0.50748
Col6a1	253.521	42.2339	-2.58563	-12.7989	5e-05	0.000124353	yes	0.16659
Col6a2	91.5954	14.096	-2.69999	-13.8667	5e-05	0.000124353	yes	0.153894
Col6a3	12.8947	10.954	-0.235323	-1.23586	0.0291	0.0466729	yes	0.849495
Col7a1	4.03263	2.63253	-0.615272	-2.84192	5e-05	0.000124353	yes	0.652807
Col8a1	8.96444	0.655974	-3.7725	-12.0568	5e-05	0.000124353	yes	0.0731753
Colec12	70.2978	83.1478	0.242199	1.2928	0.0237	0.0386876	yes	1.18279
Commd10	12.5907	18.9064	0.586522	2.55392	5e-05	0.000124353	yes	1.50162
Commd2	7.89112	9.8351	0.31771	1.43365	0.0142	0.0242729	yes	1.24635
Commd3	100.634	69.432	-0.535441	-2.74931	5e-05	0.000124353	yes	0.689948
Commd9	24.8585	14.0801	-0.820082	-3.47223	5e-05	0.000124353	yes	0.56641
Comt	45.8616	65.4202	0.51245	2.32931	5e-05	0.000124353	yes	1.42647
Comtd1	6.56241	15.5445	1.24411	1.68899	0.0066	0.0120192	yes	2.36872
Copb2	80.0648	56.4325	-0.504642	-2.707	5e-05	0.000124353	yes	0.704835
Cope	112.463	86.677	-0.375731	-1.98659	0.00045	0.000992722	yes	0.770715
Copg2	27.1073	21.7198	-0.31967	-1.58069	0.0062	0.0113257	yes	0.801253
Coprs	19.1273	25.4334	0.41109	1.62235	0.0047	0.00877834	yes	1.32969
Cops2	59.7316	49.5332	-0.270099	-1.43969	0.01375	0.0235687	yes	0.829263
Cops3	60.6474	40.7471	-0.57375	-2.96757	5e-05	0.000124353	yes	0.671868
Cops4	61.5099	51.2756	-0.262547	-1.39071	0.0147	0.025062	yes	0.833615
Cops5	67.4309	38.5927	-0.805083	-4.24048	5e-05	0.000124353	yes	0.572329
Cops6	120.858	100.438	-0.267002	-1.41945	0.01265	0.021822	yes	0.831045
Copz1	65.2406	78.9416	0.275015	1.46714	0.0097	0.0170898	yes	1.21001
Copz2	109.229	25.8732	-2.07783	-9.78261	5e-05	0.000124353	yes	0.23687
Coq10a	50.3387	15.0189	-1.74489	-8.84249	5e-05	0.000124353	yes	0.298357
Coq10b	30.6401	18.755	-0.708146	-3.44045	5e-05	0.000124353	yes	0.612106
Coq4	9.42542	6.2923	-0.582969	-2.2997	5e-05	0.000124353	yes	0.667588
Coq6	15.5681	20.2759	0.381173	1.73101	0.00265	0.00518295	yes	1.3024
Coq7	9.63356	18.7216	0.958561	3.42247	5e-05	0.000124353	yes	1.94337
Coq9	66.7888	49.2194	-0.440378	-2.33066	5e-05	0.000124353	yes	0.736941
Coro1b	59.2605	104.043	0.81204	4.34683	5e-05	0.000124353	yes	1.75569
Coro1c	22.9489	55.1253	1.26429	6.72044	5e-05	0.000124353	yes	2.40209
Coro2b	9.31397	5.5537	-0.745947	-3.35403	5e-05	0.000124353	yes	0.596276
Coro6	181.704	31.4967	-2.52832	-12.8434	5e-05	0.000124353	yes	0.17334
Coro7	11.3799	5.30685	-1.10056	-1.7848	0.0067	0.0121834	yes	0.466335
Cotl1	5.78022	11.6412	1.01004	3.80038	5e-05	0.000124353	yes	2.01397
Cox10	6.76301	13.8411	1.03322	4.66908	5e-05	0.000124353	yes	2.04659
Cox11	7.77744	9.87837	0.344977	1.24537	0.03095	0.0493719	yes	1.27013
Cox14	144.971	114.367	-0.342098	-1.79004	0.0015	0.00305922	yes	0.788893
Cox15	14.11	11.4645	-0.299548	-1.40262	0.0146	0.0249052	yes	0.812507
Cox17	280.489	197.191	-0.508352	-2.6238	5e-05	0.000124353	yes	0.703025
Cox18	12.7964	17.1605	0.423357	1.76134	0.00315	0.00607556	yes	1.34104
Cox19	88.8689	39.2464	-1.17912	-5.59228	5e-05	0.000124353	yes	0.441621
Cox5a	209.447	254.66	0.281985	1.50872	0.0083	0.0148105	yes	1.21587
Cox6a1	295.034	621.472	1.07481	5.73759	5e-05	0.000124353	yes	2.10644
Cox6a2	206.692	22.5087	-3.19892	-13.3346	5e-05	0.000124353	yes	0.1089
Cox7a1	31.9525	2.86035	-3.48167	-5.86161	5e-05	0.000124353	yes	0.0895185
Cox7a2	162.804	192.945	0.245055	1.30648	0.02255	0.0369564	yes	1.18514
Cox7a2l	182.713	218.626	0.25889	1.39444	0.01535	0.0260805	yes	1.19656
Cox7c	349.793	482.25	0.46328	2.47213	5e-05	0.000124353	yes	1.37867
Cox8a	373.108	778.471	1.06105	5.66433	5e-05	0.000124353	yes	2.08645
Cox8b	180.313	1.29844	-7.11758	-9.12844	5e-05	0.000124353	yes	0.00720104
Cp	20.0824	5.64749	-1.83025	-6.62828	5e-05	0.000124353	yes	0.281216
Cpa4	1.61479	0.140431	-3.52341	-4.33788	5e-05	0.000124353	yes	0.0869657
Cpd	43.9601	19.5262	-1.17078	-6.18352	5e-05	0.000124353	yes	0.444181
Cpe	107.883	266.497	1.30464	6.79801	5e-05	0.000124353	yes	2.47022
Cpeb1	4.45474	18.3538	2.04267	8.96781	5e-05	0.000124353	yes	4.12007
Cpeb2	5.96445	1.87397	-1.67029	-7.16237	5e-05	0.000124353	yes	0.31419
Cpeb3	4.05692	2.03835	-0.992983	-4.03856	5e-05	0.000124353	yes	0.502438
Cpeb4	15.0507	11.1199	-0.43668	-2.2953	0.00015	0.000354026	yes	0.738833
Cpne1	17.5716	23.2587	0.404522	1.64308	0.00455	0.00851614	yes	1.32365
Cpne2	46.9718	14.6905	-1.67691	-8.35338	5e-05	0.000124353	yes	0.312752
Cpne3	12.6212	18.4733	0.549588	2.90011	5e-05	0.000124353	yes	1.46367
Cpne8	9.84146	7.40692	-0.409998	-1.24323	0.0299	0.0478138	yes	0.752624
Cpox	15.6406	27.2042	0.798531	4.11494	5e-05	0.000124353	yes	1.73933
Cpq	41.4402	25.4464	-0.703568	-3.56113	5e-05	0.000124353	yes	0.614052
Cpsf3	26.3286	38.8395	0.560891	2.93372	5e-05	0.000124353	yes	1.47518
Cpsf3l	26.6064	33.5212	0.333302	1.63516	0.00385	0.00729852	yes	1.25989
Cpsf4	14.1924	19.1985	0.435871	1.96411	0.00065	0.001402	yes	1.35273
Cpsf6	14.9969	21.1918	0.498844	2.66479	5e-05	0.000124353	yes	1.41308
Cpt1a	14.459	29.8798	1.0472	5.49601	5e-05	0.000124353	yes	2.06652
Cpt1c	2.31357	3.07101	0.408593	1.33554	0.01895	0.0315867	yes	1.32739
Cpt2	16.4431	10.9237	-0.590021	-2.75022	5e-05	0.000124353	yes	0.664333
Cptp	7.30591	9.86267	0.432915	1.88937	0.0015	0.00305922	yes	1.34996
Cpz	0.598793	1.48009	1.30555	2.67169	0.0002	0.000464606	yes	2.47178
Cr1l	20.8311	33.3712	0.679865	3.30221	5e-05	0.000124353	yes	1.60199
Crabp2	27.9932	40.2689	0.524587	2.34361	0.0001	0.000241206	yes	1.43852
Crat	37.4018	15.7689	-1.24602	-6.3055	5e-05	0.000124353	yes	0.42161
Crbn	27.6275	19.3992	-0.51011	-2.06238	0.0004	0.000888268	yes	0.702169
Crcp	22.2387	29.8545	0.424876	2.0204	0.0003	0.000679963	yes	1.34246
Creb1	4.87322	7.88187	0.693662	3.5012	5e-05	0.000124353	yes	1.61738
Creb5	0.985193	7.50481	2.92934	8.64912	5e-05	0.000124353	yes	7.61762
Crebbp	6.22035	8.81239	0.502539	2.56054	5e-05	0.000124353	yes	1.4167
Crebl2	6.5081	11.8704	0.867065	3.74507	5e-05	0.000124353	yes	1.82395
Crebrf	5.81159	8.72816	0.586745	2.98436	5e-05	0.000124353	yes	1.50185
Crebzf	10.2385	14.5929	0.511259	2.42262	5e-05	0.000124353	yes	1.42529
Creg1	21.2773	41.1951	0.953157	4.86915	5e-05	0.000124353	yes	1.9361
Creld1	41.684	4.73327	-3.13858	-12.9619	5e-05	0.000124353	yes	0.113552
Creld2	32.7691	39.0638	0.253498	1.2588	0.03025	0.0483423	yes	1.19209
Crem	3.03103	5.37416	0.826232	2.61245	5e-05	0.000124353	yes	1.77305
Crim1	2.51749	6.71638	1.4157	4.12867	5e-05	0.000124353	yes	2.66789
Crip1	158.546	32.042	-2.30686	-9.30747	5e-05	0.000124353	yes	0.2021
Crip2	327.608	89.4294	-1.87315	-9.84994	5e-05	0.000124353	yes	0.272977
Crk	30.6151	40.4682	0.402545	2.14509	5e-05	0.000124353	yes	1.32184
Crkl	23.5323	18.9483	-0.31257	-1.67686	0.00385	0.00729852	yes	0.805206
Crlf1	19.3967	2.15855	-3.16768	-9.92868	5e-05	0.000124353	yes	0.111284
Crnde	5.38305	1.67496	-1.6843	-3.9269	5e-05	0.000124353	yes	0.311154
Crnkl1	20.8736	12.2506	-0.768829	-3.84931	5e-05	0.000124353	yes	0.586894
Crot	17.2684	21.8489	0.339422	1.72574	0.00295	0.00572365	yes	1.26525
Crtap	36.1226	59.0362	0.708698	3.69007	5e-05	0.000124353	yes	1.63433
Crtc1	7.95152	11.82	0.571922	2.91744	5e-05	0.000124353	yes	1.4865
Crtc2	19.8961	27.3945	0.461401	2.36896	5e-05	0.000124353	yes	1.37688
Crtc3	6.18012	7.98436	0.369542	1.77736	0.0015	0.00305922	yes	1.29194
Cry1	10.0912	8.1267	-0.312359	-1.42412	0.01325	0.0227778	yes	0.805324
Cry2	10.1042	2.82624	-1.838	-7.64665	5e-05	0.000124353	yes	0.279709
Cryab	2313	688.209	-1.74885	-7.84071	5e-05	0.000124353	yes	0.297539
Cryba4	4.88095	1.16404	-2.06802	-3.53708	5e-05	0.000124353	yes	0.238487
Crybg3	1.97707	2.77292	0.488046	1.32612	0.02195	0.0360732	yes	1.40254
Cryl1	1.68201	2.73609	0.701927	1.66145	0.00495	0.00921335	yes	1.62668
Cryz	12.5678	19.1155	0.605013	2.7144	5e-05	0.000124353	yes	1.52099
Cryzl1	16.0672	19.9599	0.312979	1.44688	0.0118	0.0204439	yes	1.24227
Csad	6.83897	10.4626	0.613387	2.56897	5e-05	0.000124353	yes	1.52985
Csdc2	25.4891	5.46566	-2.22141	-9.65349	5e-05	0.000124353	yes	0.214432
Csde1	206.758	99.241	-1.05894	-5.29224	5e-05	0.000124353	yes	0.479985
Cse1l	44.8973	24.9475	-0.847732	-4.52164	5e-05	0.000124353	yes	0.555658
Csf1r	0.104183	2.65019	4.6689	6.97717	5e-05	0.000124353	yes	25.4378
Csf2rb	3.12431	93.0971	4.89713	21.7691	5e-05	0.000124353	yes	29.7977
Csf2rb2	0.537817	15.2279	4.82346	14.2693	5e-05	0.000124353	yes	28.3143
Csgalnact1	4.18423	14.3294	1.77594	7.93494	5e-05	0.000124353	yes	3.42461
Csnk1a1	157.543	117.185	-0.426958	-2.27477	5e-05	0.000124353	yes	0.743829
Csnk1g2	103.808	76.5027	-0.440337	-2.36511	5e-05	0.000124353	yes	0.736962
Csnk1g3	9.84666	13.5358	0.459079	2.31989	5e-05	0.000124353	yes	1.37466
Csnk2a1	74.473	51.1527	-0.541905	-2.89082	5e-05	0.000124353	yes	0.686863
Cspp1	4.5398	8.20854	0.854498	3.84649	5e-05	0.000124353	yes	1.80813
Csrnp1	8.15815	10.7539	0.398551	1.79067	0.0021	0.00417977	yes	1.31818
Csrnp2	9.84979	6.3208	-0.639985	-3.01653	5e-05	0.000124353	yes	0.64172
Csrp1	60.6101	37.2312	-0.703044	-3.67745	5e-05	0.000124353	yes	0.614275
Csrp2	29.7048	65.3184	1.13679	5.30489	5e-05	0.000124353	yes	2.19891
Csrp2bp	7.95049	13.9491	0.811056	3.93102	5e-05	0.000124353	yes	1.7545
Csrp3	182.375	10.7898	-4.07917	-16.028	5e-05	0.000124353	yes	0.0591626
Cst3	817.575	238.12	-1.77966	-9.27001	5e-05	0.000124353	yes	0.291252
Cst6	1.83262	4.14455	1.1773	4.23866	5e-05	0.000124353	yes	2.26153
Cstad	1.16206	0.316598	-1.87596	-1.98687	0.0075	0.0135074	yes	0.272446
Cstb	118.517	215.48	0.862451	4.46588	5e-05	0.000124353	yes	1.81812
Cstf1	25.1747	17.5605	-0.519643	-2.49666	5e-05	0.000124353	yes	0.697544
Cstf2	9.59569	19.907	1.05282	5.02265	5e-05	0.000124353	yes	2.07458
Cstf2t	22.0831	26.4685	0.261334	1.28118	0.02695	0.0435627	yes	1.19859
Ctage5	28.7857	35.8271	0.3157	1.67511	0.00305	0.00590013	yes	1.24462
Ctbp1	111.084	93.1643	-0.253806	-1.34977	0.01795	0.030037	yes	0.838681
Ctbp2	10.6086	19.5287	0.880361	4.31893	5e-05	0.000124353	yes	1.84084
Ctc1	12.194	8.95058	-0.446117	-2.19171	0.0001	0.000241206	yes	0.734016
Ctcf	19.3852	24.8502	0.358301	1.88837	0.00135	0.00277475	yes	1.28192
Ctdp1	8.3373	11.7271	0.49219	2.36675	5e-05	0.000124353	yes	1.40658
Ctdsp1	48.0966	58.7035	0.287514	1.54324	0.00785	0.0140642	yes	1.22054
Ctdsp2	96.1551	61.4064	-0.646975	-3.35998	5e-05	0.000124353	yes	0.638618
Ctdspl	2.51342	1.75622	-0.517176	-1.83776	0.0012	0.00248043	yes	0.698738
Ctdspl2	4.728	3.6882	-0.358314	-1.65934	0.004	0.00755745	yes	0.780076
Ctf1	5.34293	2.05896	-1.37571	-3.64392	5e-05	0.000124353	yes	0.385363
Ctgf	29.047	71.0284	1.29001	6.78113	5e-05	0.000124353	yes	2.4453
Cth	5.82352	13.1877	1.17922	4.51164	5e-05	0.000124353	yes	2.26454
Ctif	15.3661	6.40833	-1.26173	-6.21366	5e-05	0.000124353	yes	0.417044
Ctla2a	32.9822	4.65095	-2.82609	-10.2601	5e-05	0.000124353	yes	0.141014
Ctla2b	1.22733	0.627775	-0.967207	-1.3283	0.02855	0.0458858	yes	0.511495
Ctnna1	312.495	149.704	-1.06172	-5.11114	5e-05	0.000124353	yes	0.479061
Ctnnal1	6.4153	5.15556	-0.315388	-1.34518	0.0182	0.0304225	yes	0.803635
Ctnnb1	162.226	234.908	0.53409	2.63433	5e-05	0.000124353	yes	1.44803
Ctnnbip1	9.30594	5.1035	-0.866665	-3.59729	5e-05	0.000124353	yes	0.548413
Ctnnbl1	14.2936	11.2638	-0.34367	-1.63419	0.0047	0.00877834	yes	0.788034
Ctnnd1	60.9323	37.2078	-0.711602	-3.82991	5e-05	0.000124353	yes	0.610642
Ctr9	14.6371	23.1462	0.661143	3.46783	5e-05	0.000124353	yes	1.58133
Ctrl	0.284429	0.77258	1.44161	1.4748	0.02865	0.0460346	yes	2.71624
Ctsb	435.977	1164.69	1.41762	4.4511	5e-05	0.000124353	yes	2.67144
Ctsc	1.16964	0.697416	-0.745977	-1.58356	0.0074	0.0133428	yes	0.596264
Ctsd	1113.93	841.016	-0.405454	-1.68612	0.00295	0.00572365	yes	0.754999
Ctsf	24.9415	6.08878	-2.03432	-8.59452	5e-05	0.000124353	yes	0.244123
Ctsh	5.45542	2.32899	-1.22799	-3.57359	5e-05	0.000124353	yes	0.426912
Ctsl	679.805	1061.68	0.643155	2.73893	5e-05	0.000124353	yes	1.56174
Ctso	5.20477	7.48447	0.524067	2.26647	0.0001	0.000241206	yes	1.438
Cttnbp2nl	10.2386	22.7786	1.15366	5.99292	5e-05	0.000124353	yes	2.22478
Ctu1	3.24903	6.09955	0.908696	3.27475	5e-05	0.000124353	yes	1.87735
Ctxn1	4.48034	7.62543	0.767211	2.38973	5e-05	0.000124353	yes	1.70198
Ctxn3	20.2976	0.0920737	-7.78431	-6.25736	0.0006	0.00130094	yes	0.00453617
Cubn	0.612722	0.41736	-0.55394	-1.68703	0.0044	0.00825408	yes	0.681157
Cuedc1	55.785	23.814	-1.22807	-5.09886	5e-05	0.000124353	yes	0.426888
Cul1	68.6073	54.4417	-0.333648	-1.79284	0.00165	0.00334041	yes	0.793527
Cul3	78.5871	61.8982	-0.344394	-1.84964	0.00085	0.00180327	yes	0.787639
Cul4a	96.3046	64.9505	-0.568264	-3.01805	5e-05	0.000124353	yes	0.674428
Cul4b	13.265	16.0336	0.273473	1.43043	0.0126	0.0217509	yes	1.20871
Cul5	16.9145	11.7378	-0.527098	-2.79826	5e-05	0.000124353	yes	0.693949
Cuta	91.442	76.0467	-0.265972	-1.31205	0.0221	0.0363005	yes	0.831638
Cux1	31.8118	17.6812	-0.847344	-3.83188	5e-05	0.000124353	yes	0.555807
Cux2	0.649072	0.0344332	-4.2365	-4.20858	5e-05	0.000124353	yes	0.0530501
Cwc15	80.4111	58.7029	-0.453963	-2.36568	0.0001	0.000241206	yes	0.730035
Cwc27	12.1881	15.7565	0.370474	1.66084	0.0047	0.00877834	yes	1.29278
Cwf19l1	3.25171	6.01401	0.887128	3.55407	5e-05	0.000124353	yes	1.84949
Cwf19l2	10.9747	7.08782	-0.630764	-3.00909	5e-05	0.000124353	yes	0.645834
Cx3cl1	8.15725	12.7018	0.638874	2.98973	5e-05	0.000124353	yes	1.55711
Cxadr	0.937256	0.0708744	-3.72511	-2.58398	0.0029	0.00563987	yes	0.0756189
Cxcl1	4.68175	0.517174	-3.17833	-4.68678	5e-05	0.000124353	yes	0.110466
Cxcl12	37.3576	45.9668	0.29919	1.4485	0.0115	0.0199576	yes	1.23045
Cxcl13	3.04314	0.0730239	-5.38105	-3.20431	0.01915	0.0318687	yes	0.0239962
Cxcl14	0.907859	0	#NAME?	#NAME?	5e-05	0.000124353	yes	#NAME?
Cxcl5	7.64859	0.910961	-3.06973	-7.14294	5e-05	0.000124353	yes	0.119102
Cxcr4	48.6717	8.53672	-2.51133	-11.1839	5e-05	0.000124353	yes	0.175394
Cxxc1	21.874	28.8011	0.396908	2.04691	0.0006	0.00130094	yes	1.31668
Cxxc5	15.8059	7.59445	-1.05745	-4.65511	5e-05	0.000124353	yes	0.480481
Cyb5a	30.8406	73.4868	1.25265	5.67912	5e-05	0.000124353	yes	2.38279
Cyb5b	44.9279	33.5802	-0.420001	-2.25576	5e-05	0.000124353	yes	0.747424
Cyb5d1	25.6743	14.2772	-0.846606	-3.14975	5e-05	0.000124353	yes	0.556091
Cyb5d2	13.828	8.22865	-0.748867	-3.32254	5e-05	0.000124353	yes	0.595071
Cyb5r1	303.932	222.81	-0.447933	-2.29391	5e-05	0.000124353	yes	0.733092
Cyb5r3	521.321	203.144	-1.35967	-6.70261	5e-05	0.000124353	yes	0.389671
Cycs	48.5548	78.0564	0.684904	3.67179	5e-05	0.000124353	yes	1.6076
Cyfip2	16.5485	0.451523	-5.19576	-8.51712	5e-05	0.000124353	yes	0.0272848
Cyhr1	60.5623	43.3476	-0.482469	-2.13197	0.0005	0.00109639	yes	0.715752
Cyld	16.1978	8.66338	-0.9028	-4.78734	5e-05	0.000124353	yes	0.534848
Cym	0.833133	4.36173	2.38828	4.58757	5e-05	0.000124353	yes	5.23533
Cyp11a1	0.0971187	2.81447	4.85697	4.61609	0.0003	0.000679963	yes	28.9797
Cyp1a1	0.610269	0.100355	-2.60434	-2.89647	5e-05	0.000124353	yes	0.164443
Cyp1b1	23.9827	3.23785	-2.88889	-13.2614	5e-05	0.000124353	yes	0.135007
Cyp20a1	16.5126	31.8133	0.946065	4.40683	5e-05	0.000124353	yes	1.92661
Cyp26a1	0.781492	0.411393	-0.925716	-1.46454	0.01515	0.025776	yes	0.526419
Cyp26b1	0.705837	0.08548	-3.04568	-4.19124	5e-05	0.000124353	yes	0.121104
Cyp27a1	1.34766	0.0381427	-5.14291	-2.82304	0.00325	0.00624609	yes	0.0283028
Cyp27b1	1.02411	2.43328	1.24853	3.1863	5e-05	0.000124353	yes	2.37599
Cyp2d22	9.64408	2.571	-1.90731	-7.03498	5e-05	0.000124353	yes	0.266589
Cyp2j12	0.455854	1.24528	1.44983	2.56687	0.0002	0.000464606	yes	2.73176
Cyp2j13	0.33493	2.03832	2.60545	6.11653	5e-05	0.000124353	yes	6.08581
Cyp2j6	11.4278	346.979	4.92423	23.2063	5e-05	0.000124353	yes	30.3627
Cyp2j9	0.71498	5.8704	3.03748	6.98115	5e-05	0.000124353	yes	8.21056
Cyp2u1	2.18738	3.58866	0.714238	2.21109	0.0003	0.000679963	yes	1.64062
Cyp39a1	9.99045	3.633	-1.45939	-5.96871	5e-05	0.000124353	yes	0.363647
Cyp46a1	2.44288	1.00256	-1.2849	-3.11552	5e-05	0.000124353	yes	0.410399
Cyp4f13	4.44962	8.30279	0.899913	3.16705	5e-05	0.000124353	yes	1.86595
Cyp4f16	1.96312	4.13962	1.07635	3.24045	5e-05	0.000124353	yes	2.10869
Cyp4f17	2.76793	1.06927	-1.37219	-3.12098	5e-05	0.000124353	yes	0.386304
Cyp4v3	2.4134	4.21985	0.806125	2.79838	5e-05	0.000124353	yes	1.74851
Cyp51	28.5888	20.2348	-0.498609	-2.6545	5e-05	0.000124353	yes	0.707789
Cyr61	136.646	17.9759	-2.92631	-14.593	5e-05	0.000124353	yes	0.131551
Cys1	5.58984	0.828409	-2.75439	-6.47355	5e-05	0.000124353	yes	0.148199
Cystm1	22.9468	2.36862	-3.27617	-7.00792	5e-05	0.000124353	yes	0.103223
Cyth1	12.3559	10.0649	-0.295869	-1.39834	0.01565	0.0265429	yes	0.814582
D030028A08Rik	1.3122	5.47392	2.06058	4.26627	5e-05	0.000124353	yes	4.17154
D030056L22Rik	9.95942	13.0242	0.387065	1.60042	0.00535	0.00989104	yes	1.30773
D10Jhu81e	64.1316	54.5158	-0.234362	-1.22704	0.03035	0.0484896	yes	0.850061
D10Wsu102e	9.57342	17.5196	0.871864	4.3053	5e-05	0.000124353	yes	1.83003
D15Ertd621e	18.8044	36.1141	0.941488	5.03613	5e-05	0.000124353	yes	1.92051
D17H6S56E-5	1.08296	0.653384	-0.728974	-1.71461	0.00375	0.00712201	yes	0.603333
D19Bwg1357e	15.1963	33.293	1.1315	5.87259	5e-05	0.000124353	yes	2.19086
D1Ertd622e	3.14716	4.34012	0.463684	1.65657	0.00405	0.00764493	yes	1.37906
D230025D16Rik	16.8771	13.8325	-0.287002	-1.288	0.0252	0.0409529	yes	0.819603
D2hgdh	4.87982	3.83484	-0.347661	-1.32694	0.0229	0.0374557	yes	0.785857
D330023K18Rik	5.79441	3.66962	-0.659029	-1.28536	0.0298	0.0476846	yes	0.633304
D3Ertd254e	3.30962	4.68668	0.501903	2.27685	5e-05	0.000124353	yes	1.41608
D3Ertd751e	2.22576	2.97945	0.420752	1.30131	0.0222	0.0364502	yes	1.33863
D5Ertd605e	0.131708	1.03213	2.97022	2.2863	0.00795	0.0142269	yes	7.83656
D630045J12Rik	1.15474	1.8106	0.648902	2.62069	5e-05	0.000124353	yes	1.56797
D6Wsu163e	8.5819	14.7521	0.781553	3.4611	5e-05	0.000124353	yes	1.71898
D830031N03Rik	9.369	4.47633	-1.06558	-1.3585	0.0265	0.0429137	yes	0.477781
D8Ertd738e	153.57	109.056	-0.493826	-2.5576	5e-05	0.000124353	yes	0.710139
D8Ertd82e	2.1016	1.30401	-0.688531	-2.29998	5e-05	0.000124353	yes	0.620485
D930016D06Rik	3.65194	4.55586	0.319058	1.28455	0.0261	0.0423101	yes	1.24752
Daam2	66.3846	41.4483	-0.679535	-3.55788	5e-05	0.000124353	yes	0.624366
Dab2	30.7092	53.1185	0.790541	4.23884	5e-05	0.000124353	yes	1.72972
Dab2ip	27.1963	12.3984	-1.13325	-5.95768	5e-05	0.000124353	yes	0.455888
Dact1	1.55933	0.297395	-2.39047	-4.94419	5e-05	0.000124353	yes	0.19072
Dact2	1.05948	2.52158	1.25097	3.39638	5e-05	0.000124353	yes	2.38001
Dact3	2.94186	1.1954	-1.29924	-3.7276	5e-05	0.000124353	yes	0.40634
Dag1	217.355	47.676	-2.18871	-10.6685	5e-05	0.000124353	yes	0.219347
Dagla	5.25782	2.58901	-1.02206	-4.37075	5e-05	0.000124353	yes	0.492413
Dancr	2.70463	6.00181	1.14996	2.91462	5e-05	0.000124353	yes	2.21908
Dap	231.692	193.953	-0.256502	-1.3316	0.02145	0.0353452	yes	0.837115
Dap3	14.7145	20.8426	0.502294	2.64122	5e-05	0.000124353	yes	1.41646
Dapk2	68.3933	6.62856	-3.36709	-14.4623	5e-05	0.000124353	yes	0.0969181
Dapk3	46.3028	27.863	-0.732752	-3.72279	5e-05	0.000124353	yes	0.601755
Dbf4	3.1928	6.23534	0.965645	3.45346	5e-05	0.000124353	yes	1.95294
Dbi	309.473	769.141	1.31344	6.83691	5e-05	0.000124353	yes	2.48533
Dbn1	38.3285	51.8682	0.436431	2.34371	5e-05	0.000124353	yes	1.35325
Dbndd1	7.2906	5.38918	-0.435972	-1.5013	0.00975	0.0171608	yes	0.739196
Dbndd2	5.34026	3.18401	-0.746064	-2.95522	5e-05	0.000124353	yes	0.596228
Dbnl	63.5137	48.5525	-0.387524	-2.07568	0.0003	0.000679963	yes	0.76444
Dbp	14.3473	9.21058	-0.639417	-1.50326	0.00975	0.0171608	yes	0.641972
Dbr1	6.06339	8.99802	0.569483	2.26105	0.0001	0.000241206	yes	1.48399
Dbt	7.62681	6.16975	-0.305867	-1.34087	0.0202	0.0334589	yes	0.808956
Dcaf10	5.78245	4.01984	-0.524544	-2.50773	5e-05	0.000124353	yes	0.695179
Dcaf11	38.0745	23.4589	-0.69869	-3.61744	5e-05	0.000124353	yes	0.616131
Dcaf12	29.7676	18.5531	-0.682086	-3.58177	5e-05	0.000124353	yes	0.623263
Dcaf13	43.1568	52.1107	0.271993	1.41169	0.0158	0.02679	yes	1.20747
Dcaf4	12.7361	9.99962	-0.348979	-1.52859	0.00775	0.0139072	yes	0.78514
Dcaf5	26.816	16.7901	-0.675485	-3.60425	5e-05	0.000124353	yes	0.626122
Dcaf6	51.859	19.1709	-1.43568	-7.54572	5e-05	0.000124353	yes	0.369673
Dcaf8	97.8004	50.4875	-0.953914	-5.06572	5e-05	0.000124353	yes	0.51623
Dcakd	66.5542	43.0204	-0.62951	-3.30967	5e-05	0.000124353	yes	0.646396
Dcbld1	2.39671	3.96097	0.724796	2.51474	5e-05	0.000124353	yes	1.65267
Dcbld2	8.19145	41.9466	2.35636	12.2225	5e-05	0.000124353	yes	5.12077
Dck	2.92711	4.22057	0.527962	1.91846	0.00085	0.00180327	yes	1.44189
Dclk1	145.826	1.73887	-6.38995	-25.3537	5e-05	0.000124353	yes	0.0119243
Dclre1a	3.47549	5.22036	0.586933	2.42206	5e-05	0.000124353	yes	1.50205
Dclre1c	4.01023	2.26042	-0.827097	-2.82994	5e-05	0.000124353	yes	0.563662
Dcn	116.534	87.1763	-0.418741	-2.24043	5e-05	0.000124353	yes	0.748077
Dcp1a	7.35169	10.083	0.45578	2.26191	0.0001	0.000241206	yes	1.37152
Dcp2	3.13915	5.1115	0.703374	3.35458	5e-05	0.000124353	yes	1.62831
Dctd	2.45113	21.5997	3.13949	11.0949	5e-05	0.000124353	yes	8.81213
Dctn1	79.9235	66.9558	-0.255412	-1.35617	0.01835	0.0306608	yes	0.837748
Dctn2	217.467	164.429	-0.403333	-1.69955	0.0031	0.00598657	yes	0.756109
Dctn4	25.9731	35.846	0.464798	2.47982	5e-05	0.000124353	yes	1.38012
Dctpp1	25.0518	33.7596	0.430383	1.68159	0.0036	0.00685288	yes	1.34759
Dcun1d1	12.3834	9.82885	-0.33331	-1.68648	0.003	0.00581156	yes	0.793713
Dcun1d3	6.41661	4.65951	-0.461633	-2.16054	0.00015	0.000354026	yes	0.726164
Dcun1d4	8.19153	6.36371	-0.364266	-1.69486	0.003	0.00581156	yes	0.776864
Dcun1d5	34.5983	27.0578	-0.354659	-1.67801	0.00415	0.00782178	yes	0.782054
Ddah1	4.9179	1.04083	-2.2403	-7.1253	5e-05	0.000124353	yes	0.211642
Ddb1	401.667	193.586	-1.05303	-4.75858	5e-05	0.000124353	yes	0.481955
Ddc	0.701607	0.0386075	-4.18371	-1.98955	0.00505	0.00938257	yes	0.0550272
Ddhd2	13.7823	20.8904	0.600025	3.13137	5e-05	0.000124353	yes	1.51574
Ddi2	11.4053	14.6309	0.359309	1.52351	0.008	0.0143123	yes	1.28281
Ddit3	97.3476	301.558	1.63122	3.88876	5e-05	0.000124353	yes	3.09775
Ddit4	6.15878	28.9389	2.23229	9.14556	5e-05	0.000124353	yes	4.69879
Ddit4l	2.05649	0.0655949	-4.97046	-4.8947	0.00025	0.000572921	yes	0.0318965
Ddost	64.0932	75.6384	0.238948	1.28122	0.026	0.0421535	yes	1.18013
Ddr1	42.4835	23.9318	-0.827977	-4.4	5e-05	0.000124353	yes	0.563319
Ddr2	21.8945	46.1794	1.07668	5.68029	5e-05	0.000124353	yes	2.10918
Ddrgk1	84.4679	57.2219	-0.561835	-2.91262	5e-05	0.000124353	yes	0.67744
Ddx10	10.5582	14.0362	0.410792	2.00979	0.0006	0.00130094	yes	1.32942
Ddx18	25.7585	46.1198	0.840339	4.37449	5e-05	0.000124353	yes	1.79047
Ddx19b	6.4151	5.04229	-0.347391	-1.68218	0.00325	0.00624609	yes	0.786004
Ddx21	45.8599	79.2157	0.788551	4.16101	5e-05	0.000124353	yes	1.72734
Ddx23	83.0448	54.4605	-0.608679	-3.26473	5e-05	0.000124353	yes	0.655797
Ddx26b	2.07781	4.22005	1.0222	3.73082	5e-05	0.000124353	yes	2.03101
Ddx27	27.742	48.4639	0.804842	4.25378	5e-05	0.000124353	yes	1.74695
Ddx39	38.62	57.1087	0.564365	2.01883	0.00165	0.00334041	yes	1.47874
Ddx39b	115.538	179.167	0.632937	3.35058	5e-05	0.000124353	yes	1.55072
Ddx41	16.368	21.7447	0.409792	2.00244	0.00095	0.001999	yes	1.32849
Ddx42	27.4466	34.4591	0.328258	1.75348	0.00205	0.00408484	yes	1.2555
Ddx5	267.691	396.197	0.565649	2.58755	5e-05	0.000124353	yes	1.48005
Ddx50	59.3191	42.6404	-0.476274	-2.54706	5e-05	0.000124353	yes	0.718832
Ddx52	14.9964	19.274	0.362041	1.83888	0.0014	0.00287133	yes	1.28524
Ddx54	32.7233	38.7107	0.242416	1.30115	0.0223	0.036595	yes	1.18297
Ddx55	3.54007	6.93904	0.97096	3.722	5e-05	0.000124353	yes	1.96014
Ddx56	15.5486	19.5237	0.328435	1.67862	0.0041	0.00773225	yes	1.25565
Ddx58	2.76467	2.04234	-0.436886	-1.63731	0.00525	0.00972065	yes	0.738727
Deaf1	8.3686	11.1872	0.418797	1.44085	0.01555	0.0263805	yes	1.33681
Decr2	5.33844	7.5564	0.50128	1.90644	0.0009	0.00190089	yes	1.41547
Def8	12.8037	16.8758	0.398402	2.02969	0.0003	0.000679963	yes	1.31805
Degs1	68.595	92.1961	0.426602	2.29131	5e-05	0.000124353	yes	1.34406
Dek	21.6545	29.2603	0.434277	1.85835	0.0011	0.00229091	yes	1.35123
Dennd1a	11.961	7.9649	-0.586606	-2.88583	5e-05	0.000124353	yes	0.665908
Dennd2a	9.13371	14.2843	0.64516	3.24948	5e-05	0.000124353	yes	1.56391
Dennd2c	1.91927	0.117825	-4.02584	-7.18049	5e-05	0.000124353	yes	0.0613905
Dennd4a	3.41253	5.12911	0.587867	2.81532	5e-05	0.000124353	yes	1.50302
Dennd5b	5.90225	2.66774	-1.14565	-5.53067	5e-05	0.000124353	yes	0.451986
Dennd6b	4.89593	7.44984	0.605627	2.76876	5e-05	0.000124353	yes	1.52164
Denr	26.6279	35.8701	0.429843	2.2235	5e-05	0.000124353	yes	1.34709
Depdc5	9.77277	7.90809	-0.305439	-1.39509	0.0144	0.0245979	yes	0.809196
Depdc7	4.08887	2.24773	-0.863234	-2.46023	5e-05	0.000124353	yes	0.549719
Deptor	54.6093	8.77108	-2.63832	-13.6736	5e-05	0.000124353	yes	0.160615
Dera	13.1706	8.01683	-0.716212	-2.89662	5e-05	0.000124353	yes	0.608694
Des	1147.82	191.936	-2.5802	-10.3948	5e-05	0.000124353	yes	0.167218
Desi1	29.9275	43.0731	0.525312	2.79149	5e-05	0.000124353	yes	1.43924
Dexi	25.4007	11.8364	-1.10163	-4.74448	5e-05	0.000124353	yes	0.46599
Dffa	19.8213	7.31968	-1.4372	-5.00447	5e-05	0.000124353	yes	0.369283
Dfna5	4.08505	11.1504	1.44868	5.52443	5e-05	0.000124353	yes	2.72958
Dgat2	3.61224	1.55343	-1.21744	-3.4874	5e-05	0.000124353	yes	0.430045
Dgcr2	27.3556	37.1195	0.440341	2.35879	5e-05	0.000124353	yes	1.35693
Dgcr6	29.6786	38.8531	0.388608	1.90861	0.00075	0.00160485	yes	1.30913
Dgka	15.7421	10.0675	-0.644925	-3.05526	5e-05	0.000124353	yes	0.639526
Dgkd	28.8457	24.3425	-0.244877	-1.31582	0.01955	0.0324733	yes	0.843888
Dgkh	1.04237	2.15652	1.04884	3.13774	5e-05	0.000124353	yes	2.06887
Dgkq	4.88769	7.8147	0.677039	2.07474	0.0004	0.000888268	yes	1.59885
Dgkz	31.2146	16.7301	-0.899773	-4.7005	5e-05	0.000124353	yes	0.535971
Dhcr24	18.4086	7.96905	-1.2079	-5.95974	5e-05	0.000124353	yes	0.432898
Dhcr7	65.0085	16.2976	-1.99597	-10.2822	5e-05	0.000124353	yes	0.250699
Dhodh	4.97157	9.40224	0.919304	3.64989	5e-05	0.000124353	yes	1.8912
Dhps	46.2689	73.1605	0.661024	3.05348	5e-05	0.000124353	yes	1.5812
Dhrs1	49.3954	40.0596	-0.30223	-1.55075	0.0064	0.0116704	yes	0.810998
Dhrs11	8.39859	5.05403	-0.732714	-2.48407	0.0001	0.000241206	yes	0.601771
Dhrs3	2.9698	37.8932	3.6735	12.1822	5e-05	0.000124353	yes	12.7595
Dhrs7	63.6672	39.9578	-0.672073	-3.44213	5e-05	0.000124353	yes	0.627604
Dhrs7b	26.0781	19.7125	-0.40373	-1.90676	0.00105	0.00219304	yes	0.755901
Dhrs9	1.04304	2.88241	1.46649	3.97469	5e-05	0.000124353	yes	2.76349
Dhx15	52.1225	73.6928	0.499617	2.67382	5e-05	0.000124353	yes	1.41384
Dhx29	18.2327	12.9598	-0.492483	-2.54181	5e-05	0.000124353	yes	0.710801
Dhx30	22.6746	32.8507	0.53485	2.81928	5e-05	0.000124353	yes	1.44879
Dhx32	23.0452	11.012	-1.06539	-3.93166	5e-05	0.000124353	yes	0.477843
Dhx33	8.50742	15.9381	0.905684	4.63634	5e-05	0.000124353	yes	1.87343
Dhx34	11.9154	9.45625	-0.333491	-1.60464	0.00525	0.00972065	yes	0.793614
Dhx35	8.34102	11.8419	0.505601	2.38151	0.0001	0.000241206	yes	1.41971
Dhx36	20.122	27.7058	0.461415	2.46413	5e-05	0.000124353	yes	1.37689
Dhx37	10.5107	22.6729	1.10911	5.68102	5e-05	0.000124353	yes	2.15713
Dhx38	17.1724	14.0147	-0.29315	-1.51777	0.00775	0.0139072	yes	0.816118
Dhx57	8.37538	11.54	0.462421	2.22979	5e-05	0.000124353	yes	1.37785
Dhx9	43.4954	52.5434	0.272646	1.46028	0.0108	0.018843	yes	1.20802
Diap2	2.19603	2.99696	0.448604	1.95881	0.00055	0.00119777	yes	1.36472
Dicer1	7.76917	9.24913	0.251557	1.32725	0.0183	0.0305855	yes	1.19049
Diexf	5.50199	7.34791	0.417379	1.99942	0.0005	0.00109639	yes	1.3355
Dimt1	7.15333	14.1209	0.981143	4.34876	5e-05	0.000124353	yes	1.97403
Dio2	53.3418	5.31354	-3.32752	-16.3937	5e-05	0.000124353	yes	0.0996131
Dip2a	4.92018	12.5812	1.35449	6.72171	5e-05	0.000124353	yes	2.55707
Dip2c	18.6796	24.6927	0.402627	2.16042	0.0002	0.000464606	yes	1.32191
Dis3	9.75401	22.9804	1.23634	5.36506	5e-05	0.000124353	yes	2.356
Dis3l	11.9951	8.68149	-0.466432	-2.23239	0.0001	0.000241206	yes	0.723752
Dis3l2	17.2937	10.2837	-0.749887	-3.67774	5e-05	0.000124353	yes	0.59465
Dixdc1	1.97707	0.78813	-1.32686	-4.21258	5e-05	0.000124353	yes	0.398635
Dkc1	12.7577	27.132	1.08863	3.71821	5e-05	0.000124353	yes	2.12672
Dkk2	1.00377	1.9387	0.949664	2.73917	5e-05	0.000124353	yes	1.93142
Dkk3	2.68361	0.135156	-4.31147	-6.75207	5e-05	0.000124353	yes	0.0503638
Dlc1	3.22695	1.87248	-0.785217	-3.15978	5e-05	0.000124353	yes	0.580265
Dlg2	1.2227	5.44045	2.15365	8.63398	5e-05	0.000124353	yes	4.44952
Dlg3	7.14734	13.5083	0.918371	4.29996	5e-05	0.000124353	yes	1.88998
Dlg5	10.4123	13.5849	0.383718	2.03409	0.0005	0.00109639	yes	1.3047
Dlgap2	0.764305	1.2431	0.701728	1.8953	0.0009	0.00190089	yes	1.62645
Dlgap4	201.191	21.8707	-3.2015	-16.0415	5e-05	0.000124353	yes	0.108706
Dll1	10.3619	2.19526	-2.23882	-8.55861	5e-05	0.000124353	yes	0.21186
Dlx3	2.0544	5.31838	1.37227	4.53529	5e-05	0.000124353	yes	2.58878
Dlx4	1.19728	0.534927	-1.16234	-2.07784	0.0009	0.00190089	yes	0.446787
Dmbx1	0.193333	1.10707	2.51758	4.55734	5e-05	0.000124353	yes	5.72621
Dmd	4.42064	0.0176782	-7.96614	-10.3182	5e-05	0.000124353	yes	0.00399901
Dmpk	142.05	32.968	-2.10726	-11.0011	5e-05	0.000124353	yes	0.232087
Dmrt2	3.50651	5.15566	0.55612	1.96297	0.00065	0.001402	yes	1.47031
Dmrta2	1.50308	0.900229	-0.739562	-1.86697	0.0016	0.00324768	yes	0.598921
Dmtf1	14.2917	19.8855	0.476537	2.34236	0.00015	0.000354026	yes	1.3914
Dmtn	0.478417	0.782019	0.708936	1.57495	0.00445	0.00834409	yes	1.6346
Dmwd	32.9176	17.5916	-0.903972	-4.60518	5e-05	0.000124353	yes	0.534413
Dmxl1	7.45044	6.30854	-0.240019	-1.26561	0.0271	0.0437595	yes	0.846734
Dmxl2	2.26647	1.6074	-0.495718	-2.12939	5e-05	0.000124353	yes	0.709209
Dna2	0.6262	0.922418	0.558799	1.38091	0.01805	0.0301962	yes	1.47304
Dnaja2	117.35	82.2814	-0.512179	-2.7283	5e-05	0.000124353	yes	0.701163
Dnaja3	50.2727	68.9951	0.456719	2.44732	5e-05	0.000124353	yes	1.37242
Dnaja4	54.7115	15.906	-1.78227	-9.24124	5e-05	0.000124353	yes	0.290726
Dnajb1	13.9838	16.9178	0.274783	1.37076	0.0168	0.0283576	yes	1.20981
Dnajb11	101.377	57.0094	-0.830461	-4.45187	5e-05	0.000124353	yes	0.56235
Dnajb14	4.97778	7.35475	0.563174	2.04311	0.0004	0.000888268	yes	1.47752
Dnajb2	71.256	42.9908	-0.728986	-3.76419	5e-05	0.000124353	yes	0.603328
Dnajb5	20.7753	2.38326	-3.12386	-11.2222	5e-05	0.000124353	yes	0.114716
Dnajc10	49.8298	37.8074	-0.39834	-2.1393	0.00015	0.000354026	yes	0.758731
Dnajc15	61.9697	95.6702	0.626507	3.02474	5e-05	0.000124353	yes	1.54382
Dnajc16	16.5287	7.9034	-1.06443	-5.2308	5e-05	0.000124353	yes	0.478162
Dnajc18	16.0535	10.4384	-0.62099	-3.21909	5e-05	0.000124353	yes	0.650225
Dnajc2	26.7067	34.5265	0.370501	1.89903	0.00115	0.00238543	yes	1.2928
Dnajc21	81.0769	23.2514	-1.80198	-9.32531	5e-05	0.000124353	yes	0.286781
Dnajc22	0.323597	0.821457	1.34399	1.86112	0.0046	0.00860323	yes	2.53852
Dnajc25	7.99435	5.73763	-0.478527	-1.78876	0.00205	0.00408484	yes	0.71771
Dnajc27	5.6781	8.87655	0.644591	3.05718	5e-05	0.000124353	yes	1.5633
Dnajc28	5.52892	2.64192	-1.06541	-4.03077	5e-05	0.000124353	yes	0.477837
Dnajc4	15.3114	11.7279	-0.384662	-1.34863	0.0187	0.0312036	yes	0.765958
Dnajc7	74.8073	62.3263	-0.263339	-1.41283	0.0134	0.0230101	yes	0.833157
Dnal1	26.4401	7.69699	-1.78036	-9.19782	5e-05	0.000124353	yes	0.291111
Dnal4	42.1177	33.6066	-0.325682	-1.64787	0.00475	0.00886505	yes	0.797921
Dnase1l1	18.2298	5.21813	-1.80469	-6.91251	5e-05	0.000124353	yes	0.286243
Dnase1l3	1.5089	0.0166672	-6.50034	-3.3638	0.00265	0.00518295	yes	0.0110459
Dnase2a	30.3565	17.4279	-0.800609	-3.80949	5e-05	0.000124353	yes	0.574107
Dnm1	28.1988	50.5268	0.841414	4.48719	5e-05	0.000124353	yes	1.79181
Dnm1l	38.976	54.1144	0.473425	2.51568	5e-05	0.000124353	yes	1.3884
Dnm3	1.97593	0.274378	-2.8483	-3.60027	0.00015	0.000354026	yes	0.13886
Dnm3os	3.05752	1.26261	-1.27595	-4.53661	5e-05	0.000124353	yes	0.412953
Dnmbp	9.62582	6.44665	-0.578361	-2.73333	5e-05	0.000124353	yes	0.669724
Dnmt3b	0.63139	1.2984	1.04013	2.56251	5e-05	0.000124353	yes	2.05641
Dnph1	8.15871	17.0475	1.06315	3.89993	5e-05	0.000124353	yes	2.08949
Dnttip1	33.9163	26.9086	-0.333913	-1.58649	0.00545	0.0100594	yes	0.793382
Dnttip2	31.3136	40.4843	0.370574	1.94994	0.00055	0.00119777	yes	1.29287
Doc2a	0.998308	2.39264	1.26105	1.88947	0.0024	0.00472905	yes	2.3967
Doc2b	0.657414	0.057741	-3.50913	-4.19617	5e-05	0.000124353	yes	0.0878308
Dock1	4.3575	6.79788	0.641583	3.09669	5e-05	0.000124353	yes	1.56004
Dock11	1.39877	1.03937	-0.428459	-1.43797	0.0124	0.0214176	yes	0.743055
Dock5	4.17889	7.57345	0.857832	4.37987	5e-05	0.000124353	yes	1.81231
Dock6	7.26744	3.673	-0.984487	-4.65379	5e-05	0.000124353	yes	0.505405
Dock7	144.84	60.2851	-1.26458	-6.21264	5e-05	0.000124353	yes	0.416221
Dock9	4.20226	7.15624	0.768037	3.75189	5e-05	0.000124353	yes	1.70295
Dok1	22.3382	29.5811	0.405159	2.00303	0.0008	0.00170331	yes	1.32423
Dok7	8.59445	0.22238	-5.27231	-9.10769	5e-05	0.000124353	yes	0.0258748
Dolk	17.382	8.70599	-0.997516	-4.43943	5e-05	0.000124353	yes	0.500862
Donson	2.04851	2.90119	0.502071	1.49288	0.0094	0.0166297	yes	1.41625
Dopey2	7.6649	3.21384	-1.25397	-5.83413	5e-05	0.000124353	yes	0.419293
Dpep1	5.96456	0.0963854	-5.95146	-7.04175	5e-05	0.000124353	yes	0.0161597
Dpf1	0.867733	0.527848	-0.717129	-1.35406	0.02245	0.0368217	yes	0.608307
Dph1	7.90584	14.3026	0.855284	3.06954	5e-05	0.000124353	yes	1.80911
Dph2	4.92489	7.40599	0.588601	2.33662	0.0001	0.000241206	yes	1.50379
Dph3	12.1745	16.4977	0.438398	1.92632	0.00085	0.00180327	yes	1.3551
Dph5	8.256	17.2972	1.06702	4.34832	5e-05	0.000124353	yes	2.0951
Dph6	8.00675	15.278	0.932171	4.26888	5e-05	0.000124353	yes	1.90815
Dpm1	4.24309	1.45671	-1.5424	-1.46798	0.0192	0.0319433	yes	0.343314
Dpm1-adnp	29.4918	23.714	-0.314573	-1.52161	0.0073	0.0131855	yes	0.804089
Dpm3	31.4689	44.1007	0.486875	1.85027	0.00185	0.00371498	yes	1.40141
Dpp3	39.2796	24.0587	-0.707223	-3.71134	5e-05	0.000124353	yes	0.612498
Dpp7	23.2442	9.8748	-1.23505	-5.36643	5e-05	0.000124353	yes	0.424828
Dpp8	42.4811	24.9488	-0.767853	-4.11696	5e-05	0.000124353	yes	0.587291
Dpp9	25.0114	29.6577	0.245823	1.30428	0.0216	0.0355687	yes	1.18577
Dpt	3.71714	0.818329	-2.18344	-4.72378	5e-05	0.000124353	yes	0.22015
Dpy19l3	6.16616	8.74267	0.503702	2.56886	5e-05	0.000124353	yes	1.41785
Dpy30	40.3777	62.8029	0.637272	2.91224	5e-05	0.000124353	yes	1.55539
Dpyd	0.298227	4.31552	3.85505	9.12819	5e-05	0.000124353	yes	14.4706
Dpysl2	1.46704	2.60227	0.826859	2.80633	5e-05	0.000124353	yes	1.77382
Dpysl3	17.7243	35.797	1.01411	5.37518	5e-05	0.000124353	yes	2.01966
Dqx1	0.749853	1.66212	1.14834	2.88651	5e-05	0.000124353	yes	2.21659
Dram1	6.32942	2.32188	-1.44678	-5.08529	5e-05	0.000124353	yes	0.366839
Dram2	27.1701	21.3276	-0.349295	-1.32441	0.02075	0.0343011	yes	0.784968
Drg2	46.8559	55.8526	0.253393	1.3358	0.0209	0.0345215	yes	1.19201
Drp2	11.4103	2.47307	-2.20596	-10.1602	5e-05	0.000124353	yes	0.21674
Dscr3	35.9118	26.7517	-0.424827	-2.21957	0.0001	0.000241206	yes	0.744928
Dse	13.4513	10.9915	-0.291356	-1.47233	0.01045	0.0182941	yes	0.817134
Dsel	4.53267	9.54025	1.07366	5.16225	5e-05	0.000124353	yes	2.10477
Dst	53.9272	15.3657	-1.8113	-8.44504	5e-05	0.000124353	yes	0.284934
Dstn	98.6494	76.6313	-0.364375	-1.95238	0.00075	0.00160485	yes	0.776805
Dtd2	3.60052	5.90828	0.714531	2.65003	5e-05	0.000124353	yes	1.64095
Dtna	32.0152	11.899	-1.42791	-6.13599	5e-05	0.000124353	yes	0.371669
Dtnb	3.12317	8.1631	1.38611	5.03507	5e-05	0.000124353	yes	2.61373
Dtnbp1	40.1836	52.0045	0.37203	1.89232	0.0012	0.00248043	yes	1.29417
Dtwd2	0.861009	1.38997	0.69095	1.72749	0.0031	0.00598657	yes	1.61435
Dtx2	19.3037	10.7316	-0.847008	-4.03583	5e-05	0.000124353	yes	0.555936
Dtx3l	3.09129	1.29906	-1.25074	-3.81885	5e-05	0.000124353	yes	0.420233
Dtymk	23.1345	33.3639	0.528239	2.14694	0.00035	0.000785252	yes	1.44217
Duox2	0.394812	2.14152	2.4394	6.14046	5e-05	0.000124353	yes	5.42416
Duoxa1	2.90166	5.1376	0.824215	2.44265	5e-05	0.000124353	yes	1.77057
Dus1l	22.1609	17.9535	-0.303748	-1.45748	0.01225	0.0211762	yes	0.810145
Dus3l	16.9011	22.6031	0.419401	2.07367	0.0004	0.000888268	yes	1.33737
Dus4l	4.28552	8.4092	0.9725	3.44155	5e-05	0.000124353	yes	1.96224
Dusp10	27.0972	46.6366	0.78332	4.13206	5e-05	0.000124353	yes	1.72109
Dusp11	24.4131	29.9379	0.294316	1.57979	0.006	0.0109863	yes	1.2263
Dusp12	10.6448	16.5967	0.640743	2.6153	5e-05	0.000124353	yes	1.55913
Dusp13	37.34	4.40007	-3.08513	-11.2086	5e-05	0.000124353	yes	0.117837
Dusp14	34.8933	24.6794	-0.49964	-2.42522	5e-05	0.000124353	yes	0.707283
Dusp16	11.3364	16.7214	0.560733	2.91952	5e-05	0.000124353	yes	1.47502
Dusp18	25.3985	8.10084	-1.6486	-8.37723	5e-05	0.000124353	yes	0.31895
Dusp19	2.47556	1.20642	-1.03702	-2.27539	0.0004	0.000888268	yes	0.487333
Dusp22	13.9319	5.68904	-1.29213	-4.41184	5e-05	0.000124353	yes	0.408348
Dusp27	60.0575	1.75616	-5.09585	-19.9413	5e-05	0.000124353	yes	0.0292413
Dusp28	14.3453	6.90184	-1.05553	-4.05624	5e-05	0.000124353	yes	0.48112
Dusp3	60.5435	22.9176	-1.40152	-7.45981	5e-05	0.000124353	yes	0.37853
Dusp4	14.7862	77.0497	2.38153	11.9863	5e-05	0.000124353	yes	5.21089
Dusp5	3.29411	13.8403	2.07091	6.25302	5e-05	0.000124353	yes	4.20152
Dusp6	8.31411	10.2096	0.296287	1.33189	0.0209	0.0345215	yes	1.22798
Dusp7	4.569	2.99861	-0.607582	-2.27232	0.0001	0.000241206	yes	0.656296
Dusp8	6.75343	3.56895	-0.920122	-4.05162	5e-05	0.000124353	yes	0.528464
Dusp9	1.63221	14.0409	3.10473	10.515	5e-05	0.000124353	yes	8.60235
Dut	3.15851	12.6203	1.99844	7.39873	5e-05	0.000124353	yes	3.99568
Dvl1	72.8157	43.8501	-0.731667	-3.91081	5e-05	0.000124353	yes	0.602208
Dvl2	12.4685	30.0577	1.26945	6.37835	5e-05	0.000124353	yes	2.4107
Dvl3	29.6868	18.8234	-0.657296	-3.39947	5e-05	0.000124353	yes	0.634066
Dym	31.2129	24.4739	-0.350896	-1.81844	0.00155	0.0031529	yes	0.784097
Dynap	32.3161	5.7172	-2.49887	-9.19959	5e-05	0.000124353	yes	0.176915
Dync1h1	51.5877	39.8548	-0.372273	-1.8392	0.00155	0.0031529	yes	0.772564
Dync1i1	9.03902	0.139355	-6.01932	-6.74147	5e-05	0.000124353	yes	0.0154172
Dync1i2	93.6036	49.6851	-0.913751	-4.91034	5e-05	0.000124353	yes	0.530803
Dync1li1	54.8048	44.4688	-0.30151	-1.59912	0.0042	0.00790881	yes	0.811403
Dync1li2	78.134	52.5497	-0.572268	-3.02699	5e-05	0.000124353	yes	0.672559
Dynll1	74.9592	54.0718	-0.471231	-2.50811	5e-05	0.000124353	yes	0.721349
Dynlrb1	200.877	139.492	-0.52613	-2.75921	5e-05	0.000124353	yes	0.694415
Dynlt1b	11.7689	7.93037	-0.569518	-1.73881	0.0035	0.00668716	yes	0.673842
Dynlt1c,Dynlt1f	16.315	13.871	-0.805687	-1.77301	0.0043	0.00808361	yes	0.57209
Dynlt3	85.1267	71.6752	-0.248138	-1.3339	0.01785	0.0298818	yes	0.841982
Dyrk1a	19.4905	16.1169	-0.274202	-1.46425	0.0115	0.0199576	yes	0.826908
Dyrk1b	17.8278	7.91526	-1.17142	-5.24518	5e-05	0.000124353	yes	0.443984
Dyrk2	48.3639	21.6339	-1.16064	-5.95503	5e-05	0.000124353	yes	0.447314
Dyrk3	2.05707	2.97582	0.532697	1.52391	0.0096	0.0169328	yes	1.44663
Dysf	31.9813	0.453364	-6.14042	-19.327	5e-05	0.000124353	yes	0.0141759
Dzank1	0.262831	1.75544	2.73963	7.00618	5e-05	0.000124353	yes	6.67899
Dzip1	2.27592	5.35829	1.23532	5.03833	5e-05	0.000124353	yes	2.35434
Dzip3	7.39582	12.878	0.800128	4.02456	5e-05	0.000124353	yes	1.74126
E030030I06Rik	0.908226	4.47737	2.30153	4.2896	5e-05	0.000124353	yes	4.9298
E130112N10Rik	1.90023	0.509166	-1.89996	-2.07991	0.00485	0.00903672	yes	0.267951
E130308A19Rik	2.88925	4.37208	0.597628	2.25996	0.0001	0.000241206	yes	1.51323
E130311K13Rik	6.14203	8.06364	0.392716	1.40765	0.0139	0.0238094	yes	1.31286
E2f2	5.47061	0.0520892	-6.71457	-7.27817	5e-05	0.000124353	yes	0.00952167
E2f4	53.2533	36.802	-0.533087	-2.80971	5e-05	0.000124353	yes	0.691074
E2f5	5.55839	8.22711	0.565717	1.43645	0.0122	0.0210927	yes	1.48012
E2f6	33.7042	20.1078	-0.745176	-3.83792	5e-05	0.000124353	yes	0.596595
E2f8	4.71702	1.41424	-1.73784	-5.89025	5e-05	0.000124353	yes	0.299818
E330009J07Rik	1.08205	3.06606	1.50262	3.69161	5e-05	0.000124353	yes	2.83357
E430025E21Rik	44.9427	55.4022	0.301857	1.62147	0.0041	0.00773225	yes	1.23273
E4f1	10.4395	13.2338	0.342181	1.5954	0.0053	0.00980445	yes	1.26767
Eaf1	25.5094	36.0376	0.498472	2.66786	5e-05	0.000124353	yes	1.41272
Ears2	2.41935	2.99235	0.30666	1.2769	0.02705	0.0436902	yes	1.23684
Ebf1	1.47806	7.52891	2.34874	9.11365	5e-05	0.000124353	yes	5.09379
Ebf3	2.90948	5.36387	0.882511	3.70194	5e-05	0.000124353	yes	1.84358
Ebna1bp2	22.2377	34.4805	0.632777	3.3053	5e-05	0.000124353	yes	1.55055
Ebp	57.6039	13.1108	-2.13541	-10.164	5e-05	0.000124353	yes	0.227603
Ebpl	3.56458	4.64752	0.382728	1.28233	0.0273	0.0440653	yes	1.3038
Ece1	30.0858	11.5359	-1.38296	-7.23359	5e-05	0.000124353	yes	0.383431
Ecel1	0.109196	0.746549	2.77332	3.43617	5e-05	0.000124353	yes	6.83679
Echs1	39.2022	72.7326	0.891668	4.62372	5e-05	0.000124353	yes	1.85532
Eci1	29.6936	37.2348	0.326498	1.53638	0.00755	0.0135915	yes	1.25397
Ecm1	56.755	26.012	-1.12557	-5.79263	5e-05	0.000124353	yes	0.458321
Eda2r	119.745	28.3393	-2.0791	-10.1772	5e-05	0.000124353	yes	0.236662
Edem1	7.56766	11.5878	0.61469	3.13639	5e-05	0.000124353	yes	1.53123
Edem3	29.6804	20.1135	-0.561346	-3.01231	5e-05	0.000124353	yes	0.67767
Edf1	211.322	117.441	-0.8475	-4.4391	5e-05	0.000124353	yes	0.555747
Edil3	15.0712	31.0342	1.04206	5.50216	5e-05	0.000124353	yes	2.05917
Ednra	2.36529	3.64543	0.624075	2.26337	0.00025	0.000572921	yes	1.54122
Edrf1	5.80416	4.62659	-0.327138	-1.50241	0.00895	0.0158903	yes	0.797116
Eea1	20.8357	37.0442	0.830188	4.43469	5e-05	0.000124353	yes	1.77792
Eef1a1	4176.56	6795.68	0.702305	1.59916	0.0051	0.00946554	yes	1.6271
Eef1a2	2.15145	0	#NAME?	#NAME?	5e-05	0.000124353	yes	#NAME?
Eef1b2	193.602	260.364	0.427436	2.21743	0.0001	0.000241206	yes	1.34484
Eef1d	95.859	116.848	0.285647	1.52916	0.00845	0.0150652	yes	1.21896
Eef1e1	21.8316	36.8864	0.756668	3.37962	5e-05	0.000124353	yes	1.68958
Eef2k	3.07262	5.48072	0.834897	3.76738	5e-05	0.000124353	yes	1.78373
Eefsec	5.29549	11.5278	1.12229	4.76395	5e-05	0.000124353	yes	2.17692
Eepd1	3.11598	0.0549384	-5.82573	-5.503	0.00065	0.001402	yes	0.0176311
Efemp2	33.4294	46.7893	0.48506	2.48427	5e-05	0.000124353	yes	1.39964
Efhc1	0.384674	0.954926	1.31175	2.27643	0.0007	0.00150227	yes	2.48242
Efhd1	10.7368	25.6825	1.25822	5.68965	5e-05	0.000124353	yes	2.392
Efhd2	18.8767	12.4398	-0.601636	-2.88005	5e-05	0.000124353	yes	0.659006
Efna1	10.646	27.0478	1.3452	5.8149	5e-05	0.000124353	yes	2.54065
Efna3	0.903522	0.443108	-1.0279	-1.40189	0.0189	0.0315161	yes	0.490423
Efna4	3.94615	5.72256	0.536216	1.71799	0.0032	0.00615954	yes	1.45016
Efnb2	6.2383	9.64098	0.628028	2.97623	5e-05	0.000124353	yes	1.54545
Efnb3	0.648454	1.23279	0.926854	2.18849	0.00015	0.000354026	yes	1.90113
Egf	0.824435	0.526745	-0.6463	-1.59016	0.0058	0.0106642	yes	0.638917
Egfl7	3.37303	1.23715	-1.44703	-2.94018	5e-05	0.000124353	yes	0.366776
Egfr	5.49097	3.13894	-0.806783	-3.03842	5e-05	0.000124353	yes	0.571655
Egln2	30.5699	23.6764	-0.368664	-1.87812	0.001	0.00209567	yes	0.774499
Egln3	61.7414	8.26823	-2.90059	-13.8312	5e-05	0.000124353	yes	0.133917
Egr1	36.2069	7.18945	-2.33231	-10.9609	5e-05	0.000124353	yes	0.198566
Egr2	0.763251	0.189994	-2.0062	-3.10084	0.0001	0.000241206	yes	0.248928
Egr3	7.63112	3.26044	-1.22683	-5.11358	5e-05	0.000124353	yes	0.427255
Ehbp1	7.20857	8.7806	0.284607	1.38647	0.0153	0.0260027	yes	1.21808
Ehbp1l1	152.896	46.629	-1.71325	-8.33525	5e-05	0.000124353	yes	0.304972
Ehd3	14.6488	17.6581	0.269542	1.37998	0.01655	0.0279584	yes	1.20543
Ehd4	93.8227	11.2721	-3.05719	-15.4758	5e-05	0.000124353	yes	0.120142
Ehmt2	59.8484	49.1433	-0.284317	-1.51371	0.0098	0.0172365	yes	0.82113
Ei24	141.487	84.4225	-0.744973	-3.96847	5e-05	0.000124353	yes	0.596679
Eid1	18.8525	14.8248	-0.346745	-1.68762	0.00245	0.00482298	yes	0.786356
Eif1	504.743	656.744	0.379783	1.89545	0.0011	0.00229091	yes	1.30115
Eif1a	36.3065	66.1347	0.865178	4.62159	5e-05	0.000124353	yes	1.82156
Eif1ad	19.6589	32.1881	0.711349	2.10294	0.0004	0.000888268	yes	1.63733
Eif1ax	92.0685	110.406	0.262043	1.37654	0.01665	0.028112	yes	1.19918
Eif2ak2	5.48766	7.59547	0.468947	2.15101	0.0001	0.000241206	yes	1.3841
Eif2b1	29.2212	24.4094	-0.259574	-1.30575	0.0219	0.0360101	yes	0.835335
Eif2b2	60.1441	47.7386	-0.333267	-1.75158	0.00235	0.00463643	yes	0.793737
Eif2b4	33.0923	27.5781	-0.262971	-1.31905	0.0223	0.036595	yes	0.83337
Eif2b5	54.0994	40.8299	-0.405989	-2.16867	5e-05	0.000124353	yes	0.754719
Eif2s1	32.1978	38.6521	0.263584	1.40303	0.0152	0.0258504	yes	1.20046
Eif2s3x	108.357	129.757	0.260018	1.34312	0.0182	0.0304225	yes	1.19749
Eif3c	184.347	226.2	0.295174	1.48381	0.01025	0.0179668	yes	1.22703
Eif3d	215.65	294.32	0.448694	2.30587	5e-05	0.000124353	yes	1.3648
Eif3f	130.395	195.155	0.581728	3.11246	5e-05	0.000124353	yes	1.49664
Eif3m	141.213	119.635	-0.239229	-1.26624	0.02875	0.0461773	yes	0.847198
Eif4a1	295.418	448.669	0.602895	2.99416	5e-05	0.000124353	yes	1.51876
Eif4a2	239.124	286.519	0.260871	1.27827	0.0267	0.0432206	yes	1.1982
Eif4a3	73.9367	90.5441	0.292329	1.55789	0.0055	0.0101442	yes	1.22462
Eif4b	182.456	223.437	0.292326	1.42229	0.01325	0.0227778	yes	1.22461
Eif4e	39.6316	69.4158	0.808614	4.32677	5e-05	0.000124353	yes	1.75153
Eif4e2	88.5441	65.201	-0.441503	-2.27442	5e-05	0.000124353	yes	0.736367
Eif4e3	4.68703	8.34968	0.833048	3.31474	5e-05	0.000124353	yes	1.78145
Eif4ebp1	129.489	293.684	1.18143	6.29832	5e-05	0.000124353	yes	2.26801
Eif4ebp3	4.57669	6.64018	0.536917	1.60368	0.00725	0.0131067	yes	1.45087
Eif4g3	37.1721	19.5811	-0.924759	-4.91523	5e-05	0.000124353	yes	0.526769
Eif4h	108.739	161.775	0.573117	3.02447	5e-05	0.000124353	yes	1.48773
Eif5a	390.819	483.688	0.307577	1.56132	0.00615	0.0112476	yes	1.23763
Eif5a2	1.72915	2.2511	0.380567	1.3595	0.0163	0.0275661	yes	1.30185
Elavl1	12.4366	17.8019	0.517438	2.73457	5e-05	0.000124353	yes	1.43141
Elf1	7.84309	10.9187	0.477312	1.32527	0.025	0.0406652	yes	1.39215
Elf4	3.78786	6.33998	0.743097	3.41792	5e-05	0.000124353	yes	1.67377
Elk1	19.382	9.87486	-0.972886	-4.8489	5e-05	0.000124353	yes	0.509486
Elmo1	1.28702	0.814294	-0.660414	-1.98461	0.0008	0.00170331	yes	0.632697
Elmo2	13.5962	9.94729	-0.450826	-2.29893	0.0001	0.000241206	yes	0.731624
Elmo3	0.743071	0.479423	-0.632201	-1.28294	0.0287	0.0461089	yes	0.645191
Elmod2	7.60485	4.65798	-0.707216	-3.24036	5e-05	0.000124353	yes	0.612501
Elovl1	40.1596	32.8564	-0.289569	-1.48232	0.0108	0.018843	yes	0.818146
Elovl4	1.69687	3.61092	1.0895	3.51326	5e-05	0.000124353	yes	2.128
Elovl5	30.8254	23.0399	-0.419982	-2.18978	5e-05	0.000124353	yes	0.747434
Elovl6	2.14169	7.09913	1.72889	7.40272	5e-05	0.000124353	yes	3.31473
Elovl7	0.19737	3.87835	4.29647	9.56027	5e-05	0.000124353	yes	19.6502
Elp2	32.5201	47.392	0.543312	2.8932	5e-05	0.000124353	yes	1.45731
Elp3	32.9437	46.8842	0.509096	2.70368	5e-05	0.000124353	yes	1.42316
Elp4	3.18349	2.42135	-0.394798	-1.66616	0.0042	0.00790881	yes	0.760596
Elp6	2.21276	3.83892	0.794853	2.39255	5e-05	0.000124353	yes	1.7349
Emb	7.87146	16.2166	1.04277	4.75165	5e-05	0.000124353	yes	2.06018
Emc1	18.9697	9.8109	-0.951238	-4.9983	5e-05	0.000124353	yes	0.517188
Emc10	38.3193	54.3427	0.504014	2.64879	5e-05	0.000124353	yes	1.41815
Emc2	199.922	88.945	-1.16845	-6.21055	5e-05	0.000124353	yes	0.444899
Emc3	107.562	87.2927	-0.301231	-1.61957	0.0038	0.00721255	yes	0.81156
Emc6	38.1921	29.8735	-0.354411	-1.74247	0.00235	0.00463643	yes	0.782189
Emc7	94.8284	76.9806	-0.300824	-1.58094	0.00545	0.0100594	yes	0.811789
Emc8	7.77667	14.0142	0.849666	4.20322	5e-05	0.000124353	yes	1.80208
Emc9	13.1603	7.14239	-0.881711	-1.53087	0.0114	0.0197979	yes	0.542723
Eme2	9.98395	4.33874	-1.20233	-4.13084	5e-05	0.000124353	yes	0.434573
Emilin1	17.3114	41.4192	1.25857	6.59019	5e-05	0.000124353	yes	2.39258
Eml3	5.30448	9.04798	0.770385	3.32995	5e-05	0.000124353	yes	1.70572
Eml4	7.61657	15.5017	1.02521	5.26085	5e-05	0.000124353	yes	2.03526
Emp1	36.7057	99.3884	1.43707	7.60993	5e-05	0.000124353	yes	2.7077
Emp2	98.4089	41.0984	-1.25971	-6.65091	5e-05	0.000124353	yes	0.417628
Emp3	139.656	165.144	0.241848	1.28102	0.0255	0.0414079	yes	1.18251
Emx2	0.707481	2.30552	1.70433	4.08066	5e-05	0.000124353	yes	3.25878
En1	8.45541	10.6025	0.326453	1.44723	0.011	0.0191515	yes	1.25393
Enah	23.5564	9.08669	-1.37429	-7.27791	5e-05	0.000124353	yes	0.385742
Endod1	9.1355	4.13272	-1.14439	-5.17046	5e-05	0.000124353	yes	0.452381
Endov	8.48484	12.7114	0.583158	2.96359	5e-05	0.000124353	yes	1.49812
Enho	73.4917	17.5106	-2.06935	-9.64479	5e-05	0.000124353	yes	0.238267
Enkd1	8.66809	14.0753	0.699379	2.66043	5e-05	0.000124353	yes	1.62381
Enkur	1.91295	0.681586	-1.48883	-2.52965	0.0003	0.000679963	yes	0.356301
Eno1,Eno1b	171.472	303.016	0.821415	4.26976	5e-05	0.000124353	yes	1.76714
Eno1b	56.9079	92.5659	0.701851	3.74172	5e-05	0.000124353	yes	1.62659
Eno2	30.8545	24.5081	-0.332222	-1.7234	0.0029	0.00563987	yes	0.794312
Eno3	498.187	60.2244	-3.04827	-15.3978	5e-05	0.000124353	yes	0.120887
Enoph1	4.86404	7.29963	0.585667	2.08766	0.0002	0.000464606	yes	1.50073
Enox1	1.75286	1.04667	-0.7439	-2.08651	0.00065	0.001402	yes	0.597123
Enox2	3.36915	6.14237	0.866411	3.53989	5e-05	0.000124353	yes	1.82312
Enpp1	18.5456	13.4671	-0.461636	-2.461	5e-05	0.000124353	yes	0.726162
Enpp2	5.89439	4.11108	-0.519826	-2.09762	0.00035	0.000785252	yes	0.697456
Enpp3	5.93118	9.97837	0.750486	3.22982	5e-05	0.000124353	yes	1.68236
Enpp5	3.62432	0.498085	-2.86325	-6.00563	5e-05	0.000124353	yes	0.137428
Ensa	119.71	82.5757	-0.535754	-2.82425	5e-05	0.000124353	yes	0.689798
Enthd2	6.55629	9.66026	0.559183	2.43159	5e-05	0.000124353	yes	1.47343
Entpd3	0.623626	0	#NAME?	#NAME?	5e-05	0.000124353	yes	#NAME?
Entpd5	7.32611	10.5203	0.52205	2.57467	5e-05	0.000124353	yes	1.43599
Entpd6	2.84361	5.21751	0.875637	3.04111	5e-05	0.000124353	yes	1.83482
Epb4.1	3.55247	1.76067	-1.0127	-3.85603	5e-05	0.000124353	yes	0.495618
Epb4.1l1	16.2899	38.29	1.23299	6.54715	5e-05	0.000124353	yes	2.35054
Epb4.1l2	21.7384	16.312	-0.414315	-2.17345	5e-05	0.000124353	yes	0.750376
Epb4.1l4a	7.40122	13.6382	0.881822	4.24659	5e-05	0.000124353	yes	1.8427
Epb4.1l4aos	7.83881	18.4509	1.23499	3.01892	5e-05	0.000124353	yes	2.3538
Epb4.1l5	5.61498	4.41272	-0.347613	-1.42466	0.013	0.0223853	yes	0.785883
Epc1	7.85913	12.1333	0.626536	2.53153	5e-05	0.000124353	yes	1.54385
Epc2	7.015	8.60254	0.29432	1.40039	0.01485	0.0253003	yes	1.22631
Epdr1	52.8966	86.2925	0.706062	3.78576	5e-05	0.000124353	yes	1.63135
Epg5	11.5908	14.6211	0.33507	1.78995	0.0013	0.00267509	yes	1.26144
Ephb2	5.70465	2.2105	-1.36777	-5.5626	5e-05	0.000124353	yes	0.38749
[truncated: 1,046,360+ more rows]
