# Supplementary material for: SWELL1 regulates skeletal muscle cell size, intracellular signaling, adiposity and glucose metabolism
Source: eLife. 2020 Sep 15;9:e58941. doi: 10.7554/eLife.58941 (PMC7541086; doi:10.7554/eLife.58941)
Supplement: Supplementary file 2. [file elife-58941-supp2.xlsx]

## Sheet: pval sorted
Supplementary Table 2: IPA canonical pathway analysis of differentially expressed genes in WT versus Lrrc8a KO C2C12
Ingenuity Canonical Pathways	-log(p-value)	Ratio	Molecules
Epithelial Adherens Junction Signaling	10.5	0.41	TUBA1B,RAPGEF1,TGFBR1,MYL2,TGFBR3,ARPC5,MYL6B,TUBB,CLIP1,TGFBR2,BAIAP2,MRAS,MYL4,ACTA1,DLL1,AKT2,NOTCH3,RRAS,FGFR1,RALB,TUBB2A,SNAI1,WASF1,PTPRM,APC,MET,EPN2,CDH2,ACTA2,MYH3,LEF1,Tcf7,RAP1B,SNAI2,ARPC1B,CTNNA1,Actn3,IQGAP1,TUBB2B,YES1,SORBS1,HGF,TGFB2,VCL,ACTC1,EGFR,VAV2,LMO7,TUBB4B,TUBA4A,TCF7L1,MYL1,RRAS2,TUBA1A,TUBB6,FER,SSX2IP,ACVR2A,CTNND1
Axonal Guidance Signaling	8.2	0.284	TUBA1B,PAPPA2,KLC1,WNT10B,ITSN1,ARPC5,NCK1,ADAM8,ADAMTS2,VEGFA,GNB4,PAK1,BAIAP2,PLXNB2,FRS2,PRKD3,AKT2,STK36,CFL1,RRAS,COPS5,SEMA5A,TUBB2A,RALB,MMP2,PLCL2,MET,DOCK1,ADAMTS6,GAB1,IRS1,RTN4,PRKACA,RAP1B,FYN,RGS3,NTN4,ARPC1B,SEMA6A,PLXNA2,FZD1,PITRM1,ABLIM1,SEMA6C,EIF4E,TUBB2B,EFNB2,MYSM1,RHOD,PRKCE,PFN2,LNPEP,RASSF5,MYL12B,PPP3CA,MYL12A,BMP1,ITGB1,NRP2,TUBB4B,MYLPF,GNAQ,PLCG1,SLIT2,MYL1,EFNA1,SEMA3…
IL-8 Signaling	6.71	0.327	MYL2,GNB5,CCND1,ITGB3,VEGFA,ROCK2,GNB4,RHOB,CCND3,PROK1,MRAS,PRKD3,FRS2,ITGB5,AKT2,PLD3,RRAS,FGFR1,RALB,HBEGF,MMP2,MAPK12,RAC3,BCL2L1,CCND2,ARAF,RND3,GAB1,PTPN11,PRKCD,IRS1,FNBP1,RAP1B,PTK2B,IQGAP1,PDGFC,EIF4EBP1,PGF,BRAF,HMOX1,MTOR,GNG11,JUN,RHOD,RHOU,PRKCE,VASP,MYL12B,EGFR,VCAM1,GNAS,PIK3C2A,RHOC,IKBKE,CSTB,GNAI2,ITGB2,GNAI3,RHOV,RRAS2,PRKCI,PIK3CB,MAP4K4,IRAK4
ILK Signaling	6.33	0.324	MYL2,PPP2R5B,MYL6B,CCND1,ITGB3,VEGFA,MYC,PARVB,CFL2,RHOB,PROK1,ATF4,MYL4,FRS2,ITGB5,ACTA1,TESK1,AKT2,CFL1,FGFR1,FERMT2,SNAI1,MAPK12,PPP2CB,DOCK1,PTPN11,RND3,ACTA2,GAB1,PPP2R3A,IRS1,MYH3,LEF1,FNBP1,FLNB,FN1,SNAI2,ILK,Actn3,PDGFC,PGF,MTOR,JUN,RHOD,CREB1,RHOU,VCL,ACTC1,ITGB1,FBLIM1,PIK3C2A,LIMS2,RHOC,VIM,MYL1,ITGB2,RHOV,FLNC,LIMS1,PIK3CB,PPP2R1B
Germ Cell-Sertoli Cell Junction Signaling	6.01	0.327	TUBA1B,TGFBR1,TUBB,TGFBR2,PAK1,RHOB,CFL2,MRAS,MTMR2,FRS2,ACTA1,MAP3K2,MAP3K14,CFL1,RRAS,FGFR1,RALB,TUBB2A,ITGA6,GSN,MAPK12,RAC3,EPN2,CDH2,RND3,ACTA2,GAB1,PTPN11,IRS1,TGFB3,FNBP1,RAP1B,ILK,Actn3,CTNNA1,IQGAP1,TUBB2B,SORBS1,RHOD,TGFB2,RHOU,VCL,ACTC1,ITGB1,PIK3C2A,TUBB4B,TJP1,RHOC,TUBA4A,RHOV,TUBA1A,RRAS2,TUBB6,FER,PIK3CB,CTNND1
mTOR Signaling	5.56	0.31	PRKAB2,RPS23,PPP2R5B,VEGFA,RHOB,PROK1,TSC2,MRAS,RPS2,PRKD3,FRS2,AKT2,PLD3,DDIT4,RRAS,FGFR1,RALB,EIF4G3,ATG13,PPP2CB,RND3,GAB1,PTPN11,PPP2R3A,PRKCD,IRS1,FNBP1,RPSA,RAP1B,ULK1,RPS18,PDGFC,EIF4E,PGF,EIF4EBP1,RPS28,HMOX1,MTOR,RHOD,PRKAA2,RPTOR,RHOU,RPS6KB2,PRKCE,RPS17,RPS12,RPS24,PIK3C2A,RHOC,RPS29,DGKZ,RHOV,EIF3F,RRAS2,PRKCI,RPS26,EIF4A1,PRKAG2,PIK3CB,PPP2R1B,RPS14
Integrin Signaling	5.47	0.303	RAPGEF1,MYL2,ARPC5,NCK1,ITGB3,Ppp1r12b,TSPAN3,PARVB,PAK1,RHOB,MRAS,FRS2,ITGB5,ACTA1,AKT2,CAPN6,RRAS,FGFR1,RALB,ITGA6,TNK2,GSN,RAC3,DOCK1,TLN2,ARF5,RND3,ACTA2,GAB1,PTPN11,ARF3,CAPN1,IRS1,ITGA7,FNBP1,CAPN3,RAP1B,FYN,ARPC1B,ILK,Actn3,BRAF,ARF6,RHOD,RHOU,PFN2,VCL,ACTC1,VASP,MYL12B,CAPN10,MYL12A,ITGB1,PIK3C2A,RHOC,PLCG1,ITGB2,RHOV,WIPF1,RRAS2,LIMS1,PIK3CB,NEDD9,Arf2
Protein Kinase A Signaling	5.28	0.266	TGFBR1,DUSP8,ACP1,GNB4,DUSP3,GYS1,PHKB,ATF4,TDP2,DUSP7,DUSP12,PRKD3,PTPRG,ADD2,PLCL2,ITPR1,AKAP13,CREM,ITPR3,PRKACA,DUSP4,Tcf7,RAP1B,ANAPC2,HIST1H1C,FLNB,Calm1 (includes others),PTK2B,AKAP8,PTPN2,DUSP22,PTPN12,MPPE1,AKAP2,PTPN4,DUSP5,PTPRJ,PDE3B,CREB1,PRKCE,MYL12B,PPP3CA,MYL12A,PTPRK,MYLPF,GNAQ,PLCG1,MYL1,GNAI3,ADD3,FLNC,DUSP18,TNNI1,PTPN22,MYL2,GNB5,MYL6B,ROCK2,TGFBR2,YWHAQ,GDE1,MYL4,SMPDL3B,ITP…
Virus Entry via Endocytic Pathways	5.19	0.351	RAP1B,FLNB,FYN,AP2A1,ITSN1,HLA-A,CLTB,ITGB3,MRAS,PRKCE,PRKD3,ACTC1,FRS2,ACTA1,ITGB5,ITGB1,PIK3C2A,RRAS,AP1S2,FGFR1,CLTC,RALB,ITGA6,PLCG1,RAC3,DNM1,AP1S1,ITGB2,RRAS2,PRKCI,GAB1,ACTA2,PTPN11,FLNC,CLTA,PRKCD,IRS1,TFRC,PIK3CB
Sirtuin Signaling Pathway	5.08	0.283	FOXO4,TUBA1B,RRP9,TOMM70,ATG9B,PDHA1,MYC,ATG4C,ATG9A,SIRT6,GABARAPL1,XPC,KAT2A,TP53,PFKFB3,CPT1A,SLC2A1,TIMM9,NDRG1,GABPB2,PGAM2,STAT3,MAPK12,AGTRAP,PFKM,ATG13,ACADL,H3F3A/H3F3B,NDUFB7,MLYCD,ATG101,XRCC5,TOMM40,HIST1H1C,GADD45B,GADD45G,RBBP8,POLR1C,MTOR,JUN,PCK2,H1FX,PGAM1,FOXO3,ACSS2,PRKAA2,ATG4A,RPTOR,NAMPT,MAP1LC3A,ATG16L2,PDK1,GOT2,NDUFS4,PPARG,TIMM8A,NDUFAF1,UCP2,PPIF,SIRT5,POLR1E,NQO1,NDUFV…
NRF2-mediated Oxidative Stress Response	4.86	0.302	GSTA5,MAF,GCLC,DNAJC15,DNAJB2,CLPP,MRAS,ATF4,GCLM,TXN,PRKD3,FRS2,DNAJC16,ACTA1,MGST1,RRAS,FGFR1,RALB,JUNB,TXNRD1,GSR,ACTA2,GAB1,PTPN11,PRKCD,IRS1,DNAJC18,SQSTM1,ABCC4,HACD3,MGST3,RAP1B,GSTM5,PRDX1,HSPB8,DNAJA4,HMOX1,JUN,PMF1/PMF1-BGLAP,VCP,PRKCE,FMO1,ACTC1,GSTM1,PIK3C2A,NQO1,HERPUD1,GSTO1,DNAJC21,FTL,RRAS2,PRKCI,MGST2,DNAJB11,PIK3CB,CDC34,DNAJB5
Regulation of Actin-based Motility by Rho	4.86	0.373	ARPC1B,MYL2,ARPC5,PIP4K2B,MYL6B,Ppp1r12b,PAK1,RHOB,RHOD,BAIAP2,RHOU,PFN2,MYL4,ACTC1,ACTA1,MYL12B,PI4KA,MYL12A,ITGB1,CFL1,RHOC,MYLPF,WASF1,GSN,RAC3,MYL1,RHOV,WIPF1,ACTA2,RND3,FNBP1
CXCR4 Signaling	4.84	0.31	MYL2,GNB5,MYL6B,ROCK2,GNB4,PAK1,RHOB,MRAS,MYL4,PRKD3,FRS2,AKT2,RRAS,ITPR2,FGFR1,RALB,ITPR1,MAPK12,ADCY9,DOCK1,RND3,GAB1,PTPN11,PRKCD,IRS1,ITPR3,GNAO1,FNBP1,RAP1B,GNG11,JUN,RHOD,RHOU,PRKCE,MYL12B,MYL12A,GNAS,PIK3C2A,CXCR4,RHOC,MYLPF,EGR1,GNAQ,MYL1,GNAI2,GNAI3,PLCB4,RHOV,PRKCI,RRAS2,PIK3CB,ELK1
Remodeling of Epithelial Adherens Junctions	4.78	0.4	TUBA1B,RAB5C,ARPC1B,ARPC5,Actn3,CTNNA1,IQGAP1,TUBB,CLIP1,TUBB2B,ARF6,HGF,VCL,ACTC1,ACTA1,TUBB4B,TUBB2A,TUBA4A,APC,DNM1,MET,TUBA1A,ACTA2,TUBB6,MAPRE3,CTNND1
Calcium Signaling	4.74	0.297	CHRNA1,CACNG1,MYL2,TNNC1,CHRNB1,TNNT2,Tpm1,MYL6B,GRIA4,ATP2A2,SLC8B1,HDAC11,ATF4,MYL4,CASQ2,ACTA1,CACNB1,HDAC4,HDAC8,TNNC2,ITPR2,TPM3,TNNI3,ITPR1,CHRND,HDAC5,CHRNG,MICU1,ACTA2,ITPR3,CACNA2D1,PRKACA,MYH3,RAP1B,TNNT1,Calm1 (includes others),TNNI2,TNNT3,CACNB3,Tpm2,ATP2A1,PPP3CB,CREB1,CACNB2,ACTC1,PPP3CA,HDAC1,CHP1,TRDN,MEF2A,PRKAR2A,MCU,MYL1,RCAN1,MEF2D,PRKAG2,TNNI1,RCAN2
Cardiac Hypertrophy Signaling	4.48	0.282	TGFBR1,MYL2,SRF,GNB5,MYL6B,ROCK2,TGFBR2,GNB4,RHOB,MRAS,MYL4,FRS2,MAP3K2,MAP3K14,RRAS,FGFR1,RALB,IL6R,PLCL2,MAPK12,ADCY9,RND3,GAB1,PTPN11,IRS1,GNAO1,PRKACA,TGFB3,FNBP1,HSPB1,RAP1B,Calm1 (includes others),EIF4E,MTOR,GNG11,JUN,PPP3CB,RHOD,CREB1,TGFB2,IGF1R,RHOU,PPP3CA,MYL12B,MYL12A,ADRB2,GNAS,PIK3C2A,RHOC,MYLPF,CHP1,MEF2A,PRKAR2A,GNAQ,PLCG1,MYL1,ADSS,GNAI2,GNAI3,PLCB4,RHOV,RRAS2,MEF2D,PRKAG2,PIK3CB,…
Glioblastoma Multiforme Signaling	4.33	0.301	WNT10B,CCND1,MYC,E2F6,RB1,RHOB,TSC2,MRAS,FRS2,FZD2,PDGFRB,TP53,AKT2,ITPR2,RRAS,WNT9A,FGFR1,RALB,ITPR1,PLCL2,APC,RND3,GAB1,PTPN11,PRKCD,IRS1,ITPR3,LEF1,FZD5,FNBP1,CDK2,RAP1B,CDK4,FZD1,PDGFC,MTOR,RHOD,IGF1R,PDGFRA,SMO,RHOU,EGFR,PIK3C2A,RHOC,PLCG1,PLCB4,RHOV,RRAS2,CDKN1A,PIK3CB
Colorectal Cancer Metastasis Signaling	4.32	0.276	WNT10B,JAK1,TGFBR1,MSH3,MMP16,GNB5,CCND1,PTGER1,VEGFA,MYC,TGFBR2,GNB4,RHOB,PROK1,MRAS,FRS2,FZD2,RALGDS,TP53,AKT2,RRAS,WNT9A,FGFR1,TYK2,RALB,IL6R,MMP2,STAT3,MAPK12,APC,ADCY9,BCL2L1,PTPN11,GAB1,RND3,IRS1,PRKACA,TGFB3,LEF1,FZD5,Tcf7,FNBP1,RAP1B,MMP14,FZD1,PDGFC,PGF,BRAF,GNG11,JUN,RHOD,TGFB2,SMO,RHOU,MMP11,PTGER4,EGFR,GNAS,MMP28,PIK3C2A,RHOC,DVL1,PRKAR2A,TCF7L1,RHOV,RRAS2,MSH2,PRKAG2,PIK3CB
Regulation of the Epithelial-Mesenchymal Transition Pathway	4.2	0.289	WNT10B,JAK1,TGFBR1,PARD6G,TGFBR2,FOXC2,MRAS,FRS2,FZD2,PDGFRB,ETS1,AKT2,TWIST2,NOTCH3,RRAS,WNT9A,FGFR1,TYK2,RALB,SNAI1,MMP2,ZEB1,STAT3,APC,MET,DVL2,CDH2,ARAF,GAB1,PTPN11,IRS1,TGFB3,LEF1,FZD5,FGFRL1,JAG1,Tcf7,RAP1B,SNAI2,PSEN2,FZD1,SMURF1,BRAF,HGF,TGFB2,SMO,EGFR,PIK3C2A,EGR1,DVL1,TCF7L1,FGF21,RRAS2,DVL3,PIK3CB,RBPJ
IGF-1 Signaling	4.18	0.33	RAP1B,SOCS1,IGFBP4,JAK1,CTGF,SOCS6,SRF,IGFBP7,YWHAQ,JUN,FOXO3,IGF1R,MRAS,RPS6KB2,SOCS2,FRS2,IGFBP6,AKT2,PIK3C2A,RRAS,FGFR1,RALB,PRKAR2A,STAT3,IGFBP2,PRKCI,RRAS2,GAB1,PTPN11,IRS1,PRKACA,PRKAG2,PIK3CB,CYR61,ELK1,SOCS7
AMPK Signaling	4.18	0.283	FOXO4,CHRNA1,PRKAB2,PPP2R5B,CHRNB1,SMARCD2,CCND1,AK1,GYS1,TSC2,SMARCB1,MRAS,ATF4,FRS2,PFKFB3,AKT2,CPT1A,SLC2A1,FGFR1,MAPK12,CHRND,SMARCD3,PFKM,PPP2CB,CHRNG,GAB1,PTPN11,SMARCA2,PPP2R3A,IRS1,PRKACA,CPT2,MLYCD,ULK1,PFKL,EIF4EBP1,MTOR,KAT2B,PCK2,TBC1D1,FOXO3,CREB1,PRKAA2,RPTOR,EEF2K,ADRB2,GNAS,PIK3C2A,PRKAR2A,SMARCD1,PFKFB2,AK6,BRD7,PPM1B,CDKN1A,PRKAG2,PIK3CB,SMARCC1,PPP2R1B,PPARGC1A
Role of Tissue Factor in Cancer	4.14	0.317	RAP1B,FYN,CTGF,PTK2B,EIF4E,ITGB3,VEGFA,YES1,PAK1,MTOR,CFL2,MRAS,STAT5B,FRS2,ITGB5,EGFR,TP53,ITGB1,STAT5A,AKT2,PIK3C2A,CFL1,RRAS,EGR1,FGFR1,RALB,ITGA6,GNAQ,PLAUR,HBEGF,MAPK12,F3,FRK,BCL2L1,RRAS2,GAB1,PTPN11,IRS1,PIK3CB,CYR61
Molecular Mechanisms of Cancer	4.11	0.253	RAPGEF1,WNT10B,TGFBR1,CCND1,RB1,PAK1,CCND3,HIPK2,FRS2,PRKD3,TP53,AKT2,STK36,RRAS,RALB,ARHGEF17,MAX,CCND2,GAB1,IRS1,PRKACA,CDK19,RAP1B,FYN,CTNNA1,CDK4,PSEN2,FZD1,ARHGEF19,CASP6,JUN,RHOD,RHOU,PRKCE,ARHGEF3,CASP8,BMP1,ITGB1,RHOC,GNAQ,FADD,GNAI3,CDKN2D,CDKN1A,RBPJ,CYCS,CTNND1,GAB2,JAK1,MYC,TGFBR2,E2F6,CDK8,RHOB,MRAS,FZD2,RALGDS,WNT9A,FGFR1,TYK2,CDK14,MAPK12,RAC3,APC,ADCY9,BCL2L1,PTPN11,RND3,PRKCD,GNA…
Fcγ Receptor-mediated Phagocytosis in Macrophages and Monocytes	4.07	0.344	GAB2,FYN,PTK2B,ARPC1B,ARPC5,NCK1,HMOX1,ARF6,YES1,PAK1,VAMP3,RPS6KB2,PRKCE,ACTC1,PRKD3,ACTA1,VASP,VAV2,AKT2,PLD3,PLCG1,FYB1,RAC3,MYO5A,DOCK1,PLA2G6,PRKCI,TLN2,ACTA2,PRKCD,VAV3
PTEN Signaling	4.04	0.317	RAP1B,MAST2,FOXO4,TGFBR1,TGFBR3,ILK,INPPL1,CCND1,OCRL,TGFBR2,INPP5B,FOXO3,IGF1R,PDGFRA,MRAS,RPS6KB2,EGFR,PDGFRB,ITGB1,AKT2,SHARPIN,RRAS,FGFR1,RALB,IKBKE,CNKSR3,IGF2R,RAC3,DDR1,SYNJ2,BCL2L1,RRAS2,INPP5J,CDKN1A,PIK3CB,FGFRL1,INPP5K,BCL2L11,MAGI3
p53 Signaling	3.99	0.327	GADD45B,SNAI2,GADD45G,CDK4,CCND1,SCO2,RB1,CASP6,JUN,KAT2B,THBS1,STAG1,HIPK2,TNFRSF10A,FRS2,CHEK2,TP53,AKT2,TP53INP1,PIK3C2A,FGFR1,HDAC1,APAF1,TIGAR,BCL2L1,CCND2,GAB1,PTPN11,IRS1,CDKN1A,PIK3CB,GNL3,ATR,CDK2,DRAM1
PI3K/AKT Signaling	3.97	0.312	RAP1B,GAB2,JAK1,NFKBIE,PPP2R5B,ILK,INPPL1,CCND1,OCRL,EIF4E,EIF4EBP1,YWHAQ,MTOR,GYS1,INPP5B,FOXO3,TSC2,MRAS,RPS6KB2,THEM4,TP53,ITGB1,AKT2,RRAS,TYK2,RALB,IKBKE,MAPK8IP1,SYNJ2,BCL2L1,PPP2CB,RRAS2,GAB1,INPP5J,LIMS1,PPP2R3A,CDKN1A,PIK3CB,INPP5K,PPP2R1B
IL-3 Signaling	3.87	0.341	RAP1B,GAB2,RAPGEF1,JAK1,PAK1,JUN,PPP3CB,MRAS,PRKCE,STAT5B,FRS2,PRKD3,PPP3CA,STAT5A,AKT2,PIK3C2A,RRAS,FGFR1,RALB,CHP1,STAT3,CSF2RB,PRKCI,RRAS2,PTPN11,GAB1,PRKCD,IRS1,PIK3CB,ELK1
Tec Kinase Signaling	3.85	0.293	FYN,JAK1,PTK2B,GNB5,GNB4,YES1,PAK1,GNG11,RHOB,TNFSF12,RHOD,RHOU,MRAS,PRKCE,STAT5B,TNFRSF10A,PRKD3,ACTC1,FRS2,ACTA1,VAV2,ITGB1,STAT5A,GNAS,PIK3C2A,RHOC,FGFR1,TYK2,GNAQ,PLCG1,STAT3,MAPK12,FRK,FADD,GNAI2,GNAI3,RHOV,PRKCI,RND3,ACTA2,GAB1,PTPN11,PRKCD,VAV3,IRS1,GNAO1,PIK3CB,FNBP1
Hereditary Breast Cancer Signaling	3.82	0.299	RAP1B,NPM1,GADD45B,GADD45G,CDK4,FANCF,SMARCD2,CCND1,FANCE,RB1,HDAC11,XPC,SMARCB1,MRAS,SLC19A1,FRS2,CHEK2,POLR2L,TP53,AKT2,HDAC4,HDAC8,PIK3C2A,RRAS,WEE1,FGFR1,HDAC1,RALB,SMARCD1,SMARCD3,FANCL,HDAC5,BRD7,RRAS2,MSH2,GAB1,PTPN11,SMARCA2,IRS1,H2AFX,CDKN1A,PIK3CB,ATR,SMARCC1
Superpathway of Inositol Phosphate Compounds	3.75	0.272	DUSP8,PPP2R5B,IPPK,PIP4K2B,ACP1,CD28,IP6K3,MTMR2,DUSP12,FRS2,PMPCA,PDGFRB,DUSP28,SEC16A,FGFR1,PPTC7,PTPRM,MET,SYNJ2,ITPK1,PTPN11,GAB1,PPP2R3A,IRS1,DUSP13,INPP5K,NUDT1,FYN,PTPN2,INPPL1,NT5C,NUDT2,HACD2,OCRL,PTPN12,PTPRF,CDC25B,DUSP5,PTPRJ,PHOSPHO1,DUSP10,INPP5B,PDGFRA,PALD1,ERBB2,PI4K2B,EYA4,PPP3CA,PI4KA,EGFR,PPFIA1,PIK3C2A,PPP1R8,DUSP27,PLCG1,PPP4R1,PLCB4,INPP5J,NUDT16,PIK3CB,PPIP5K2,PTPN22
Ovarian Cancer Signaling	3.75	0.297	RAP1B,WNT10B,CDK4,FZD1,CCND1,PDGFC,PGF,BRAF,VEGFA,RB1,MTOR,PROK1,SMO,MRAS,RPS6KB2,FZD2,FRS2,EGFR,TP53,GJA1,AKT2,PIK3C2A,RRAS,WNT9A,FGFR1,DVL1,RALB,PTGS1,PRKAR2A,MMP2,TCF7L1,APC,RRAS2,MSH2,GAB1,PTPN11,IRS1,PRKACA,PRKAG2,EDNRA,LEF1,PIK3CB,FZD5,Tcf7
Macropinocytosis Signaling	3.67	0.337	RAP1B,NGF,PDGFC,ITGB3,ARF6,PAK1,HGF,MRAS,PRKCE,FRS2,PRKD3,ITGB5,ITGB1,PIK3C2A,RRAS,FGFR1,RALB,PLCG1,RAB34,MET,ITGB2,PRKCI,RRAS2,PTPN11,GAB1,IRS1,PRKCD,CD14,PIK3CB
Chronic Myeloid Leukemia Signaling	3.64	0.315	RAP1B,GAB2,TGFBR1,CDK4,CCND1,TGFBR2,MYC,RB1,E2F6,HDAC11,CTBP2,MRAS,TGFB2,STAT5B,FRS2,TP53,STAT5A,AKT2,HDAC4,HDAC8,PIK3C2A,RRAS,FGFR1,RALB,HDAC1,IKBKE,HDAC5,BCL2L1,RRAS2,PTPN11,GAB1,IRS1,CDKN1A,TGFB3,PIK3CB
Ephrin Receptor Signaling	3.63	0.284	RAPGEF1,ITSN1,EPHB2,ARPC5,GNB5,ACP1,NCK1,VEGFA,ROCK2,GNB4,PAK1,CFL2,PROK1,MRAS,ATF4,MAP3K14,NGEF,AKT2,CFL1,RRAS,RALB,STAT3,RAC3,SDCBP,PTPN11,GNAO1,RAP1B,FYN,RGS3,ARPC1B,PDGFC,PGF,EPHB6,EFNB2,GNG11,SORBS1,SDC2,CREB1,ITGB1,GNAS,CXCR4,GNAQ,EFNA1,GNAI2,GNAI3,WIPF1,RRAS2,ADAM10,EPHB3,MAP4K4
STAT3 Pathway	3.61	0.32	RAP1B,SOCS1,TGFBR1,PTPN2,TGFBR3,SOCS6,TGFBR2,MYC,VEGFA,HGF,MRAS,PDGFRA,TGFB2,IGF1R,SOCS2,PDGFRB,EGFR,IL4R,RRAS,FGFR1,RALB,TYK2,STAT3,MAPK12,IGF2R,DDR1,CSF2RB,RRAS2,CDKN1A,IL10RB,FGFRL1,SOCS7,IFNAR1
Death Receptor Signaling	3.58	0.33	PARP6,NFKBIE,PARP9,DFFA,CASP6,TIPARP,TNFSF12,PARP11,HTRA2,CASP8,TNFRSF1B,TNFRSF10A,ACTC1,ACTA1,MAP3K14,ZC3HAV1,APAF1,LMNA,IKBKE,PARP3,ARHGDIB,FADD,TRAF2,RIPK1,ACTA2,CASP2,CYCS,HSPB7,MAP4K4,HSPB1
Osteoarthritis Pathway	3.56	0.275	BGLAP,TGFBR1,PRKAB2,HES1,SLC39A8,TGFBR2,VEGFA,PROK1,RUNX2,MTF1,ATF4,MYBBP1A,FZD2,ADAMTS5,HDAC4,H19,DDIT4,FGFR1,CASP2,ANKH,LEF1,FZD5,JAG1,Tcf7,FN1,CTNNA1,CASP4,FZD1,PDGFC,OCRL,PGF,CASP6,MTOR,DDR2,ANXA5,FOXO3,CREB1,PRKAA2,SMO,NAMPT,CASP8,TNFRSF1B,PPARG,ITGB1,TIMP3,S1PR2,SMAD7,GREM1,TCF7L1,IL1R1,FADD,PRKAG2,SOX9,RBPJ,P2RX7,PPARGC1A
Glioma Invasiveness Signaling	3.56	0.347	RAP1B,ITGB3,RHOB,RHOD,RHOU,MRAS,FRS2,ITGB5,TIMP2,TIMP3,PIK3C2A,RRAS,RHOC,FGFR1,RALB,PLAUR,MMP2,RHOV,RRAS2,PTPN11,GAB1,RND3,IRS1,PIK3CB,PLAU,FNBP1
Phospholipase C Signaling	3.55	0.269	MYL2,GNB5,MYL6B,Ppp1r12b,GNB4,RHOB,HDAC11,MRAS,ATF4,MYL4,PRKD3,RALGDS,PLD3,HDAC4,HDAC8,RRAS,ITPR2,RALB,ARHGEF17,ITPR1,HDAC5,ADCY9,PLA2G6,RND3,PRKCD,ITPR3,FNBP1,RAP1B,BLNK,FYN,Calm1 (includes others),TGM2,HMOX1,ARHGEF19,GNG11,AHNAK,PPP3CB,RHOD,CREB1,RHOU,PRKCE,ARHGEF3,PPP3CA,MYL12B,MYL12A,ITGB1,GNAS,RHOC,MYLPF,HDAC1,CHP1,MEF2A,GNAQ,PLCG1,MYL1,PLA2G4A,PLCB4,RHOV,PRKCI,RRAS2,MEF2D
HER-2 Signaling in Breast Cancer	3.48	0.326	RAP1B,PARD6G,CCND1,ITGB3,TSC2,MRAS,PRKCE,ERBB2,FRS2,PRKD3,ITGB5,EGFR,TP53,ITGB1,AKT2,PIK3C2A,RRAS,FGFR1,RALB,PLCG1,MMP2,ITGB2,PRKCI,RRAS2,PTPN11,GAB1,PRKCD,IRS1,CDKN1A,PIK3CB
Agrin Interactions at Neuromuscular Junction	3.46	0.347	RAP1B,CHRNA1,ITGB3,PAK1,JUN,MUSK,UTRN,MRAS,LAMB1,ERBB2,DAG1,ACTC1,ACTA1,EGFR,ITGB1,RRAS,RALB,DVL1,ITGA6,MAPK12,RAC3,ITGB2,RRAS2,ACTA2,RAPSN
Role of NFAT in Cardiac Hypertrophy	3.43	0.268	CACNG1,TGFBR1,GNB5,TGFBR2,GNB4,HDAC11,MRAS,PRKD3,FRS2,AKT2,CACNB1,HDAC4,HDAC8,RRAS,ITPR2,FGFR1,RALB,PLCL2,ITPR1,MAPK12,HDAC5,ADCY9,GAB1,PTPN11,PRKCD,IRS1,ITPR3,CACNA2D1,PRKACA,TGFB3,RAP1B,Calm1 (includes others),CACNB3,GNG11,PPP3CB,TGFB2,IGF1R,PRKCE,CACNB2,PPP3CA,GNAS,PIK3C2A,HDAC1,CHP1,MEF2A,PRKAR2A,GNAQ,PLCG1,CTF1,GNAI2,RCAN1,GNAI3,PLCB4,PRKCI,RRAS2,MEF2D,PRKAG2,PIK3CB,RCAN2
α-Adrenergic Signaling	3.29	0.322	RAP1B,Calm1 (includes others),GNB5,PHKA2,GNB4,PHKB,GNG11,GYS1,MRAS,PRKCE,PRKD3,GNAS,RRAS,ITPR2,RALB,GNAQ,PRKAR2A,PLCG1,ITPR1,GNAI2,ADCY9,GNAI3,PYGM,PRKCI,RRAS2,PRKCD,ITPR3,PRKACA,PRKAG2
Actin Nucleation by ARP-WASP Complex	3.27	0.362	RAP1B,ITGB1,ARPC1B,RRAS,RHOC,ARPC5,RALB,WASF1,NCK1,ROCK2,RHOV,WIPF1,RRAS2,RND3,RHOB,RHOD,BAIAP2,RHOU,MRAS,FNBP1,VASP
GADD45 Signaling	3.27	0.526	TP53,GADD45B,CCND2,CCND3,GADD45G,CDKN1A,CDK4,ATR,CCND1,CDK2
1D-myo-inositol Hexakisphosphate Biosynthesis II (Mammalian)	3.27	0.526	SYNJ2,ITPK1,INPP5J,SEC16A,INPP5B,IPPK,INPPL1,INPP5K,OCRL,PMPCA
Cholecystokinin/Gastrin-mediated Signaling	3.25	0.311	RAP1B,PTK2B,SRF,ROCK2,JUN,RHOB,RHOD,RHOU,MRAS,PRKCE,PRKD3,EGFR,RRAS,RHOC,ITPR2,RALB,MEF2A,GNAQ,ITPR1,MAPK12,RHOV,PLCB4,IL18,PRKCI,RRAS2,RND3,MEF2D,PRKCD,CREM,ITPR3,ELK1,FNBP1
Gap Junction Signaling	3.24	0.27	TUBA1B,BGLAP,PRKG2,TUBB,GRIA4,MRAS,PRKD3,FRS2,ACTA1,MAP3K2,GJA1,AKT2,TJP2,RRAS,ITPR2,FGFR1,RALB,TUBB2A,PLCL2,ITPR1,ADCY9,ACTA2,GAB1,PTPN11,PRKCD,IRS1,ITPR3,PRKACA,RAP1B,TUBB2B,PPP3CB,PRKCE,ACTC1,PPP3CA,EGFR,GNAS,PIK3C2A,TUBB4B,TJP1,PRKAR2A,GNAQ,TUBA4A,PLCG1,GJC1,GNAI2,GNAI3,PLCB4,TUBA1A,PRKCI,RRAS2,TUBB6,PRKAG2,PIK3CB
ERK/MAPK Signaling	3.24	0.27	RAPGEF1,PPP2R5B,SRF,MYC,YWHAQ,PAK1,MRAS,ATF4,FRS2,ETS1,RRAS,FGFR1,RALB,STAT3,RAC3,PPP2CB,PLA2G6,DOCK1,H3F3A/H3F3B,TLN2,DUSP9,ARAF,GAB1,PTPN11,PPP2R3A,PRKCD,IRS1,PRKACA,DUSP4,HSPB7,HSPB1,RAP1B,FYN,PTK2B,EIF4E,EIF4EBP1,BRAF,ELF4,CREB1,PRKCE,PPARG,ITGB1,PIK3C2A,PRKAR2A,PLCG1,MKNK2,PLA2G4A,PRKCI,RRAS2,PRKAG2,PIK3CB,ELK1,PPP2R1B
HGF Signaling	3.24	0.302	RAP1B,RAPGEF1,CCND1,ELF4,PAK1,JUN,HGF,MRAS,PRKCE,FRS2,PRKD3,MAP3K2,ETS1,ITGB1,MAP3K14,AKT2,PIK3C2A,RRAS,FGFR1,RALB,PLCG1,STAT3,MAPK12,MET,DOCK1,PRKCI,RRAS2,PTPN11,GAB1,PRKCD,IRS1,CDKN1A,PIK3CB,ELK1,CDK2
3-phosphoinositide Degradation	3.23	0.285	DUSP8,PTPN2,PPP2R5B,MTMR1,ACP1,NT5C,INPPL1,NUDT2,HACD2,PTPN12,OCRL,PTPRF,CDC25B,DUSP5,PTPRJ,PHOSPHO1,DUSP10,INPP5B,MTM1,MTMR2,EYA4,PALD1,DUSP12,PPP3CA,DUSP28,PPFIA1,PPP1R8,DUSP27,MTMR14,PPTC7,PPP4R1,PTPRM,SYNJ2,ITPK1,INPP4A,INPP5J,PTPN11,PPP2R3A,NUDT16,DUSP13,INPP5K,PTPN22,NUDT1
Aryl Hydrocarbon Receptor Signaling	3.19	0.291	NFIX,GSTM5,GSTA5,CDK4,RARG,CCND1,ARNT,TGM2,MYC,RB1,JUN,CCND3,ALDH3A2,TGFB2,ALDH3A1,CHEK2,TP53,GSTM1,MGST1,NFIC,NQO1,APAF1,GSTO1,ALDH9A1,CYP1B1,CCND2,MGST2,ALDH1L2,CDKN1A,TGFB3,ALDH18A1,HSPB7,ATR,NCOR2,RXRA,CDK2,MGST3,HSPB1,MCM7
PDGF Signaling	3.13	0.312	RAP1B,JAK1,SRF,ACP1,INPPL1,OCRL,PDGFC,MYC,JUN,INPP5B,MRAS,PDGFRA,FRS2,PDGFRB,PIK3C2A,RRAS,FGFR1,RALB,TYK2,PLCG1,STAT3,SYNJ2,RRAS2,GAB1,PTPN11,INPP5J,IRS1,PIK3CB,INPP5K,ELK1
PEDF Signaling	3.12	0.315	RAP1B,GDNF,NFKBIE,SRF,NGF,ROCK2,MRAS,CASP8,FRS2,TP53,PPARG,ARHGAP22,AKT2,PIK3C2A,RRAS,FGFR1,RALB,SERPINF1,IKBKE,TCF7L1,ZEB1,MAPK12,BCL2L1,RRAS2,GAB1,PTPN11,IRS1,PIK3CB,ELK1
Signaling by Rho Family GTPases	3.1	0.257	MYL2,ARPC5,GNB5,PIP4K2B,MYL6B,CDC42EP2,CLIP1,ROCK2,GNB4,PAK1,CFL2,RHOB,BAIAP2,MRAS,MYL4,CDH13,FRS2,ACTA1,CFL1,FGFR1,ARHGEF17,WASF1,MAPK12,DES,PKN1,CDH2,PTPN11,RND3,ACTA2,GAB1,IRS1,GNAO1,FNBP1,ARPC1B,PTK2B,CDC42EP5,IQGAP1,ARHGEF19,GNG11,JUN,RHOD,RHOU,ARHGEF3,ACTC1,MYL12B,PI4KA,MYL12A,ITGB1,GNAS,PIK3C2A,RHOC,MYLPF,GNAQ,VIM,CDH15,MYL1,GNAI2,GNAI3,RHOV,WIPF1,PRKCI,PIK3CB,ELK1
Pancreatic Adenocarcinoma Signaling	3.09	0.297	JAK1,TGFBR1,CDK4,CCND1,PDGFC,PGF,TGFBR2,VEGFA,RB1,HMOX1,E2F6,PROK1,TGFB2,ERBB2,FRS2,RALGDS,EGFR,TP53,AKT2,PLD3,PIK3C2A,FGFR1,TYK2,HBEGF,STAT3,MAPK12,BCL2L1,PTPN11,GAB1,IRS1,CDKN1A,TGFB3,PIK3CB,ELK1,CDK2
Ephrin B Signaling	3.06	0.333	VAV2,GNAS,RGS3,CFL1,ITSN1,CXCR4,EPHB2,GNB5,GNAQ,ACP1,RAC3,GNAI2,EPHB6,ROCK2,GNAI3,EFNB2,GNB4,PAK1,GNG11,CFL2,VAV3,GNAO1,MRAS,EPHB3
Breast Cancer Regulation by Stathmin1	3.05	0.265	TUBA1B,PPP2R5B,GNB5,TUBB,ROCK2,E2F6,GNB4,PAK1,MRAS,PRKD3,FRS2,TP53,RRAS,ITPR2,FGFR1,RALB,TUBB2A,ARHGEF17,ITPR1,ADCY9,PPP2CB,GAB1,PTPN11,PPP2R3A,PRKCD,IRS1,ITPR3,PRKACA,UHMK1,CDK2,RAP1B,Calm1 (includes others),TUBB2B,ARHGEF19,GNG11,PRKCE,ARHGEF3,GNAS,PIK3C2A,TUBB4B,PRKAR2A,GNAQ,TUBA4A,GNAI2,GNAI3,PLCB4,TUBA1A,PRKCI,RRAS2,TUBB6,CDKN1A,PRKAG2,PIK3CB,PPP2R1B
IL-4 Signaling	3.01	0.315	RAP1B,SOCS1,JAK1,HLA-A,INPPL1,OCRL,MTOR,HLA-DMA,INPP5B,MRAS,RPS6KB2,FRS2,IL4R,AKT2,PIK3C2A,RRAS,FGFR1,RALB,TYK2,HMGA1,SYNJ2,RRAS2,PTPN11,GAB1,INPP5J,IRS1,PIK3CB,INPP5K
Dermatan Sulfate Degradation (Metazoa)	3.01	0.529	HYAL2,TMEM2,IDS,GM2A,HYAL1,HEXA,HEXB,FGFRL1,CEMIP
3-phosphoinositide Biosynthesis	2.84	0.263	DUSP8,PPP2R5B,PIP4K2B,ACP1,CD28,MTMR2,DUSP12,FRS2,PDGFRB,DUSP28,FGFR1,PPTC7,PTPRM,MET,ITPK1,GAB1,PTPN11,PPP2R3A,IRS1,DUSP13,NUDT1,FYN,PTPN2,NT5C,NUDT2,HACD2,OCRL,PTPN12,PTPRF,CDC25B,DUSP5,PTPRJ,PHOSPHO1,DUSP10,INPP5B,PDGFRA,PI4K2B,PALD1,ERBB2,EYA4,PI4KA,PPP3CA,EGFR,PPFIA1,PIK3C2A,PPP1R8,DUSP27,PPP4R1,NUDT16,PIK3CB,PTPN22
RhoGDI Signaling	2.84	0.269	MYL2,ARPC1B,ARHGDIG,ARPC5,GNB5,PIP4K2B,MYL6B,ROCK2,GNB4,ARHGEF19,PAK1,GNG11,RHOB,CFL2,RHOD,RHOU,MRAS,MYL4,ARHGEF3,CDH13,ACTC1,DLC1,ACTA1,PI4KA,MYL12B,MYL12A,ITGB1,GNAS,CFL1,RHOC,MYLPF,GNAQ,WASF1,ARHGEF17,CDH15,ARHGDIB,MYL1,GNAI2,DGKZ,GNAI3,RHOV,CDH2,RND3,ACTA2,GNAO1,FNBP1
TWEAK Signaling	2.84	0.4	MAP3K14,TRAF3,NFKBIE,APAF1,IKBKE,BAG4,TNFRSF12A,FADD,CASP6,TRAF2,RIPK1,TNFSF12,CYCS,CASP8
p38 MAPK Signaling	2.82	0.292	TGFBR1,DDIT3,HMGN1,SRF,CDC25B,TGFBR2,MYC,DUSP10,CREB1,RPS6KB2,TGFB2,ATF4,EEF2K,TNFRSF1B,TP53,MEF2A,IL1R1,MKNK2,MAPK12,FADD,PLA2G6,PLA2G4A,IL18,TRAF2,MAX,H3F3A/H3F3B,MAPT,MEF2D,TGFB3,HSPB7,ELK1,IRAK4,HSPB1
Non-Small Cell Lung Cancer Signaling	2.81	0.313	RAP1B,CDK4,CCND1,RB1,FOXO3,MRAS,ERBB2,RASSF5,FRS2,EGFR,TP53,AKT2,PIK3C2A,RRAS,ITPR2,FGFR1,RALB,PLCG1,ITPR1,RRAS2,PTPN11,GAB1,IRS1,ITPR3,PIK3CB,RXRA
D-myo-inositol (1,4,5)-trisphosphate Degradation	2.78	0.5	SYNJ2,INPP5J,SEC16A,INPP5B,IMPA2,INPPL1,INPP5K,OCRL,PMPCA
Thrombopoietin Signaling	2.76	0.324	RAP1B,STAT5A,GAB2,PIK3C2A,RRAS,FGFR1,RALB,PLCG1,STAT3,MYC,PRKCI,JUN,RRAS2,PTPN11,GAB1,PRKCD,IRS1,MRAS,PRKCE,PIK3CB,STAT5B,FRS2,PRKD3
RAN Signaling	2.75	0.533	KPNA6,RCC1,CSE1L,RAN,XPO1,RANBP1,KPNA1,IPO5
Prolactin Signaling	2.75	0.307	RAP1B,FYN,SOCS1,SOCS6,MYC,JUN,MRAS,PRKCE,SOCS2,STAT5B,FRS2,PRKD3,STAT5A,PIK3C2A,RRAS,FGFR1,RALB,PLCG1,STAT3,PRKCI,RRAS2,PTPN11,GAB1,IRS1,PRKCD,PIK3CB,SOCS7
Thrombin Signaling	2.71	0.257	MYL2,GNB5,MYL6B,Ppp1r12b,ROCK2,GNB4,RHOB,MRAS,MYL4,PRKD3,FRS2,AKT2,RRAS,ITPR2,FGFR1,RALB,PLCL2,ITPR1,MAPK12,ADCY9,RND3,GAB1,PTPN11,PRKCD,IRS1,GNAO1,ITPR3,FNBP1,RAP1B,GNG11,RHOD,CREB1,RHOU,PRKCE,ARHGEF3,MYL12B,EGFR,MYL12A,GNAS,PIK3C2A,RHOC,MYLPF,GNAQ,PLCG1,MYL1,GNAI2,GNAI3,PLCB4,RHOV,PRKCI,RRAS2,PIK3CB,ELK1
JAK/Stat Signaling	2.67	0.303	RAP1B,SOCS1,JAK1,SOCS6,MTOR,JUN,MRAS,SOCS2,STAT5B,FRS2,STAT5A,AKT2,PIK3C2A,RRAS,FGFR1,RALB,TYK2,GNAQ,STAT3,BCL2L1,RRAS2,PTPN11,GAB1,IRS1,CDKN1A,PIK3CB,SOCS7
NF-κB Signaling	2.66	0.263	RAP1B,TRAF3,TGFBR1,TGFBR3,NFKBIE,TNFAIP3,NGF,BRAF,TGFBR2,UBE2V1,IGF1R,PDGFRA,MRAS,TDP2,CASP8,TNFRSF1B,FRS2,PDGFRB,EGFR,MAP3K14,AKT2,PIK3C2A,RRAS,FGFR1,RELB,RALB,HDAC1,MALT1,IL1R1,IGF2R,DDR1,TAB3,FADD,IL18,TRAF2,RRAS2,RIPK1,ARAF,GAB1,PTPN11,IRS1,PRKACA,PIK3CB,FGFRL1,TIRAP,MAP4K4,IRAK4
Cell Cycle: G1/S Checkpoint Regulation	2.65	0.328	TP53,HDAC4,HDAC8,HDAC1,CDK4,CCND1,HDAC5,MYC,RB1,E2F6,CDKN2D,CCND2,MAX,CCND3,HDAC11,CDKN1A,TGFB3,TGFB2,ATR,GNL3,CDK2
Polyamine Regulation in Colon Cancer	2.65	0.455	PPARG,MYC,MAX,MXD1,SAT1,PSME4,SAT2,OAZ2,APC,ODC1
Acute Myeloid Leukemia Signaling	2.64	0.296	RAP1B,RUNX1,CCND1,EIF4EBP1,MYC,BRAF,MTOR,MRAS,RPS6KB2,CEBPA,STAT5B,FRS2,STAT5A,AKT2,PIK3C2A,RRAS,FGFR1,RALB,STAT3,TCF7L1,CSF2RB,RRAS2,ARAF,PTPN11,GAB1,IRS1,PIK3CB,LEF1,Tcf7
EIF2 Signaling	2.6	0.254	RPL22,RPS23,CCND1,MYC,VEGFA,MRAS,RPL21,ATF4,RPS2,FRS2,ACTA1,PABPC1,AKT2,ATF3,RRAS,RPL3,FGFR1,RALB,EIF4G3,RPL12,RPL28,RPL10A,RPL8,ACTA2,GAB1,PTPN11,IRS1,PPP1R15A,RPSA,RAP1B,DDIT3,ATF5,Rpl36a,RPS18,EIF4E,RPS28,IGF1R,RPS12,RPS17,ACTC1,RPS24,PIK3C2A,RPL17,TRIB3,RPS29,WARS,EIF3F,RRAS2,RPS26,EIF4A1,PIK3CB,EIF1AX,RPLP0,RPS14
PAK Signaling	2.6	0.291	RAP1B,PTK2B,MYL2,MYL6B,NCK1,PDGFC,PAK1,CFL2,MRAS,PDGFRA,MYL4,FRS2,MYL12B,PDGFRB,MYL12A,ITGB1,CFL1,PIK3C2A,RRAS,MYLPF,FGFR1,RALB,MAPK12,MYL1,RRAS2,PTPN11,GAB1,IRS1,EPHB3,PIK3CB
Insulin Receptor Signaling	2.56	0.271	RAP1B,FOXO4,FYN,RAPGEF1,JAK1,INPPL1,NCK1,OCRL,EIF4E,PTPRF,EIF4EBP1,MTOR,GYS1,PDE3B,INPP5B,FOXO3,TSC2,RPTOR,RPS6KB2,MRAS,FRS2,AKT2,PIK3C2A,RRAS,FGFR1,RALB,PRKAR2A,ACLY,SYNJ2,RRAS2,PRKCI,INPP5J,GAB1,PTPN11,IRS1,PRKACA,PRKAG2,PIK3CB,INPP5K
Gαq Signaling	2.54	0.266	Calm1 (includes others),PTK2B,NFKBIE,GNB5,ROCK2,HMOX1,GNB4,GYS1,GNG11,RHOB,PPP3CB,RHOD,RHOU,MRAS,PRKCE,PRKD3,FRS2,PPP3CA,AKT2,GNAS,PLD3,PIK3C2A,RHOC,ITPR2,FGFR1,CHP1,GNAQ,PLCG1,IKBKE,ITPR1,RHOV,PLCB4,PRKCI,GAB1,PTPN11,RND3,PRKCD,IRS1,ITPR3,PIK3CB,ELK1,FNBP1
Thyroid Cancer Signaling	2.53	0.356	RAP1B,PPARG,TP53,GDNF,RRAS,RALB,TCF7L1,NGF,CCND1,MYC,BRAF,RRAS2,MRAS,LEF1,RXRA,Tcf7
Cell Cycle Control of Chromosomal Replication	2.53	0.34	MCM6,CDT1,CDK4,CDK14,POLD1,RPA2,MCM3,RPA3,CDK8,PRIM1,MCM2,ORC5,CDK19,PRIM2,CHEK2,CDK2,DBF4,MCM7
UVC-Induced MAPK Signaling	2.53	0.347	RAP1B,TP53,RRAS,RALB,MAPK12,SMPD2,BRAF,PRKCI,JUN,RRAS2,ARAF,PRKCD,MRAS,PRKCE,ATR,PRKD3,EGFR
Chondroitin Sulfate Degradation (Metazoa)	2.52	0.5	HYAL2,TMEM2,GM2A,HYAL1,HEXA,HEXB,ARSB,CEMIP
Endometrial Cancer Signaling	2.48	0.314	RAP1B,TP53,AKT2,PIK3C2A,RRAS,FGFR1,RALB,CTNNA1,ILK,CCND1,MYC,RRAS2,PTPN11,GAB1,IRS1,FOXO3,MRAS,LEF1,PIK3CB,ERBB2,ELK1,FRS2
B Cell Receptor Signaling	2.45	0.257	RAP1B,BLNK,GAB2,Calm1 (includes others),PTK2B,NFKBIE,INPPL1,BCL6,OCRL,MTOR,JUN,CFL2,PPP3CB,INPP5B,CREB1,MRAS,RPS6KB2,ATF4,RASSF5,FRS2,PPP3CA,MAP3K2,ETS1,VAV2,MAP3K14,AKT2,PIK3C2A,CFL1,RRAS,EGR1,FGFR1,RALB,IKBKE,MALT1,MAPK12,SYNJ2,BCL2L1,RRAS2,GAB1,PTPN11,INPP5J,PAG1,IRS1,VAV3,PIK3CB,INPP5K,ELK1
Calcium-induced T Lymphocyte Apoptosis	2.44	0.328	Calm1 (includes others),ITPR2,HLA-A,HDAC1,CHP1,PLCG1,ITPR1,ATP2A2,ATP2A1,PRKCI,PPP3CB,HLA-DMA,MEF2D,PRKCD,ITPR3,PRKCE,PRKD3,PPP3CA,ORAI1
Glioma Signaling	2.42	0.277	RAP1B,Calm1 (includes others),CDK4,CCND1,PDGFC,RB1,E2F6,MTOR,IGF1R,MRAS,PDGFRA,PRKCE,FRS2,PRKD3,PDGFRB,EGFR,TP53,AKT2,PIK3C2A,RRAS,FGFR1,RALB,PLCG1,IGF2R,CDKN2D,PRKCI,RRAS2,PTPN11,GAB1,PRKCD,IRS1,CDKN1A,PIK3CB
Folate Polyglutamylation	2.39	0.8	MTHFD1L,SHMT1,MTHFD1,SHMT2
NF-κB Activation by Viruses	2.37	0.29	RAP1B,NFKBIE,ITGB3,MRAS,PRKCE,FRS2,PRKD3,ITGB5,ITGB1,MAP3K14,AKT2,PIK3C2A,RRAS,FGFR1,RALB,ITGA6,IKBKE,ITGB2,TRAF2,PRKCI,RIPK1,RRAS2,PTPN11,GAB1,IRS1,PRKCD,PIK3CB
Hepatic Fibrosis / Hepatic Stellate Cell Activation	2.37	0.256	IGFBP4,CTGF,FN1,TGFBR1,MYL2,MYL6B,PDGFC,PGF,TGFBR2,COL5A1,COL1A2,VEGFA,COL6A1,PROK1,HGF,IGF1R,TGFB2,PDGFRA,MYL4,ECE1,COL11A2,TNFRSF1B,TIMP2,PDGFRB,EGFR,IL4R,COL5A2,VCAM1,COL6A2,FGFR1,IL6R,IFNGR2,SMAD7,MMP2,COL4A3BP,IL1R1,MYL1,MET,COL1A1,ACTA2,MYH3,TGFB3,CD14,EDNRA,IFNAR1,COL7A1
CCR3 Signaling in Eosinophils	2.37	0.271	RAP1B,Calm1 (includes others),GNB5,Ppp1r12b,ROCK2,GNB4,PAK1,GNG11,CFL2,MRAS,PRKCE,FRS2,PRKD3,GNAS,PIK3C2A,CFL1,RRAS,ITPR2,FGFR1,RALB,ITPR1,MAPK12,GNAI2,GNAI3,PLA2G6,PLA2G4A,PLCB4,PRKCI,RRAS2,GAB1,PTPN11,PRKCD,IRS1,ITPR3,PIK3CB
Mouse Embryonic Stem Cell Pluripotency	2.36	0.279	RAP1B,JAK1,FZD1,MYC,ID1,SMO,MRAS,FZD2,FRS2,TP53,AKT2,PIK3C2A,RRAS,FGFR1,DVL1,TYK2,RALB,TCF7L1,STAT3,MAPK12,APC,DVL2,RRAS2,GAB1,PTPN11,IRS1,FZD5,PIK3CB,DVL3,LEF1,Tcf7
Unfolded protein response	2.33	0.327	PPARG,DDIT3,ERN1,INSIG1,HSPA9,CEBPD,CEBPZ,HSPA2,TRAF2,UBXN4,SREBF2,EDEM1,ERO1B,VCP,PPP1R15A,CEBPA,ATF4,CD82
Clathrin-mediated Endocytosis Signaling	2.33	0.251	APOE,AP2A1,RAB5C,EPS15,ARPC1B,EPHB2,GAK,ARPC5,CLTB,SH3GLB1,PDGFC,ITGB3,PGF,VEGFA,ARF6,CD2AP,SNX9,PPP3CB,PROK1,DAB2,STAM,SH3GLB2,ACTC1,FRS2,PPP3CA,ITGB5,ACTA1,MYO6,ITGB1,PIK3C2A,AP1S2,FGFR1,CHP1,CLTC,HIP1,MET,DNM1,AP1S1,FGF21,ITGB2,PTPN11,GAB1,ACTA2,IRS1,CLTA,TFRC,PIK3CB,MYO1E,HIP1R
Small Cell Lung Cancer Signaling	2.32	0.294	TP53,AKT2,TRAF3,PIK3C2A,FGFR1,NFKBIE,CDK4,APAF1,IKBKE,CCND1,MYC,RB1,BCL2L1,TRAF2,MAX,GAB1,PTPN11,IRS1,TRAF4,CKS1B,CYCS,PIK3CB,RXRA,FRS2,CDK2
Estrogen-Dependent Breast Cancer Signaling	2.32	0.294	RAP1B,STAT5A,AKT2,PIK3C2A,RRAS,FGFR1,RALB,HSD17B11,DHRS11,CCND1,HSD17B8,RRAS2,JUN,GAB1,PTPN11,IRS1,CREB1,IGF1R,MRAS,ATF4,PIK3CB,STAT5B,ELK1,FRS2,EGFR
Regulation of IL-2 Expression in Activated and Anergic T Lymphocytes	2.32	0.294	RAP1B,VAV2,FYN,Calm1 (includes others),TGFBR1,RRAS,NFKBIE,CHP1,RALB,PLCG1,TOB1,IKBKE,MALT1,MAPK12,TGFBR2,CD28,RRAS2,JUN,PPP3CB,VAV3,TGFB2,MRAS,TGFB3,ELK1,PPP3CA
Sphingosine-1-phosphate Signaling	2.3	0.273	PTK2B,CASP4,PDGFC,CASP6,RHOB,RHOD,RHOU,PDGFRA,CASP8,FRS2,PDGFRB,AKT2,S1PR2,PIK3C2A,RHOC,FGFR1,GNAQ,PLCG1,PLCL2,SMPD2,GNAI2,ADCY9,GNAI3,RHOV,PLCB4,PTPN11,GAB1,RND3,IRS1,CASP2,S1PR1,PIK3CB,FNBP1
Growth Hormone Signaling	2.29	0.296	SOCS1,STAT5A,PIK3C2A,FGFR1,SOCS6,SRF,PLCG1,STAT3,PRKCI,PTPN11,GAB1,PRKCD,IRS1,RPS6KB2,CEBPA,IGF1R,PRKCE,SOCS2,PIK3CB,STAT5B,SOCS7,ELK1,FRS2,PRKD3
GDNF Family Ligand-Receptor Interactions	2.29	0.296	RAP1B,GDNF,ARTN,PIK3C2A,RRAS,ITPR2,FGFR1,RALB,PLCG1,NCK1,ITPR1,MAPK12,PDLIM7,JUN,RRAS2,PTPN11,GAB1,GFRA1,IRS1,ITPR3,CREB1,MRAS,PIK3CB,FRS2
14-3-3-mediated Signaling	2.29	0.267	RAP1B,TUBA1B,TUBB,TUBB2B,YWHAQ,JUN,TSC2,MRAS,PRKCE,FRS2,PRKD3,AKT2,PIK3C2A,RRAS,TUBB4B,FGFR1,TUBB2A,RALB,TUBA4A,PLCG1,VIM,PLCL2,MAPK12,PLCB4,TRAF2,TUBA1A,PRKCI,RRAS2,GAB1,TUBB6,PTPN11,PRKCD,IRS1,MAPT,PIK3CB,ELK1
fMLP Signaling in Neutrophils	2.28	0.27	RAP1B,Calm1 (includes others),ARPC1B,NFKBIE,ARPC5,GNB5,GNB4,GNG11,PPP3CB,MRAS,PRKCE,FRS2,PRKD3,PPP3CA,GNAS,PIK3C2A,RRAS,ITPR2,FGFR1,CHP1,RALB,ITPR1,GNAI2,GNAI3,PLCB4,PRKCI,RRAS2,GAB1,PTPN11,PRKCD,IRS1,ITPR3,PIK3CB,ELK1
Glutathione Biosynthesis	2.27	1	GCLC,GCLM,GSS
N-acetylglucosamine Degradation I	2.27	1	GNPDA1,AMDHD2,GNPDA2
Colanic Acid Building Blocks Biosynthesis	2.26	0.5	GPI,UGDH,GALK2,UGP2,PMM1,GALK1,MPI
Apoptosis Signaling	2.24	0.284	RAP1B,NFKBIE,DFFA,CASP6,MRAS,PRKCE,HTRA2,CASP8,TNFRSF1B,CAPN10,TP53,MAP3K14,CAPN6,RRAS,RALB,APAF1,LMNA,PLCG1,IKBKE,BCL2L1,RRAS2,CASP2,CAPN1,CYCS,MAP4K4,BCL2L11,CAPN3
Role of JAK2 in Hormone-like Cytokine Signaling	2.23	0.375	SOCS1,STAT5A,JAK1,PTPN11,IRS1,TYK2,SOCS6,SOCS2,STAT3,STAT5B,SOCS7,SH2B1
FAK Signaling	2.23	0.279	RAP1B,FYN,PAK1,MRAS,VCL,ACTC1,FRS2,ACTA1,CAPN10,EGFR,ITGB1,CAPN6,AKT2,PIK3C2A,RRAS,FGFR1,RALB,PLCG1,DOCK1,TLN2,RRAS2,GAB1,ACTA2,PTPN11,IRS1,CAPN1,PIK3CB,TNS1,CAPN3
TNFR1 Signaling	2.22	0.333	MAP4K2,MAP3K14,NFKBIE,APAF1,TNFAIP3,IKBKE,FADD,CASP6,TRAF2,PAK1,RIPK1,JUN,MADD,CASP2,CYCS,CASP8
Stearate Biosynthesis I (Animals)	2.21	0.341	BDH2,ACSL3,PORCN,GNPAT,DHRS11,ACOT7,ELOVL6,DHCR24,SRD5A3,ACSL5,ZADH2,SLC27A1,ACOT9,ACSL1,THEM4
LPS-stimulated MAPK Signaling	2.21	0.286	RAP1B,MAP3K14,PIK3C2A,RRAS,FGFR1,NFKBIE,RALB,SRF,IKBKE,MAPK12,PAK1,RRAS2,PRKCI,JUN,GAB1,PTPN11,PRKCD,IRS1,CREB1,MRAS,CD14,PRKCE,PIK3CB,ELK1,PRKD3,FRS2
Nitric Oxide Signaling in the Cardiovascular System	2.2	0.275	Calm1 (includes others),SLC7A1,PRKG2,PDGFC,ATP2A2,PGF,ATP2A1,VEGFA,BDKRB2,PROK1,PDE3B,PRKCE,FRS2,PRKD3,AKT2,PIK3C2A,ITPR2,FGFR1,PRKAR2A,ITPR1,PRKCI,GAB1,PTPN11,PRKCD,IRS1,ITPR3,PRKACA,PRKAG2,PDE5A,PIK3CB
HMGB1 Signaling	2.2	0.265	RAP1B,JUN,KAT2B,RHOB,RHOD,RHOU,MRAS,TGFB2,TNFRSF1B,KAT2A,FRS2,PLAT,AKT2,VCAM1,PIK3C2A,RRAS,RHOC,FGFR1,RALB,IFNGR2,IL1R1,MAPK12,Kat6b,RHOV,IL18,RRAS2,GAB1,PTPN11,RND3,KAT6A,IRS1,TGFB3,PIK3CB,ELK1,FNBP1
Cyclins and Cell Cycle Regulation	2.19	0.295	TP53,HDAC4,HDAC8,WEE1,HDAC1,PPP2R5B,CDK4,CCND1,HDAC5,RB1,PPP2CB,E2F6,CDKN2D,CCND2,CCND3,PPP2R3A,HDAC11,CDKN1A,TGFB3,TGFB2,ATR,PPP2R1B,CDK2
Melanoma Signaling	2.17	0.311	RAP1B,TP53,AKT2,PIK3C2A,RRAS,FGFR1,RALB,CDK4,CCND1,BRAF,RB1,RRAS2,PTPN11,GAB1,IRS1,CDKN1A,MRAS,PIK3CB,FRS2
UVA-Induced MAPK Signaling	2.14	0.273	RAP1B,PARP6,PARP9,MTOR,JUN,TIPARP,MRAS,RPS6KB2,PARP11,FRS2,EGFR,TP53,PIK3C2A,RRAS,FGFR1,RALB,ZC3HAV1,PLCG1,PLCL2,PARP3,MAPK12,SMPD2,BCL2L1,PLCB4,RRAS2,GAB1,PTPN11,IRS1,PIK3CB,CYCS
ERK5 Signaling	2.14	0.3	RAP1B,RRAS,RALB,MEF2A,GNAQ,NGF,YWHAQ,CTF1,MYC,RRAS2,PTPN11,GAB1,MEF2D,FOXO3,CREB1,RPS6KB2,MRAS,ATF4,WNK1,MAP3K2,EGFR
GM-CSF Signaling	2.12	0.291	ETS1,RAP1B,RUNX1,AKT2,PIK3C2A,RRAS,FGFR1,RALB,STAT3,CCND1,BCL2L1,CSF2RB,RRAS2,PTPN11,PPP3CB,GAB1,IRS1,MRAS,PIK3CB,STAT5B,ELK1,FRS2,PPP3CA
SAPK/JNK Signaling	2.11	0.274	RAP1B,DUSP8,GNG11,JUN,DUSP10,MRAS,FRS2,MAP3K2,MAP4K2,TP53,PIK3C2A,RRAS,FGFR1,RALB,MAPK12,MAPK8IP1,RAC3,MAP4K3,FADD,TRAF2,RIPK1,RRAS2,GAB1,PTPN11,IRS1,PIK3CB,DUSP4,ELK1,MAP4K4
VEGF Signaling	2.11	0.274	RAP1B,PTK2B,Actn3,PDGFC,PGF,ARNT,ROCK2,VEGFA,PROK1,FOXO3,MRAS,VCL,ACTC1,FRS2,ACTA1,AKT2,PIK3C2A,RRAS,FGFR1,RALB,PLCG1,BCL2L1,RRAS2,GAB1,ACTA2,PTPN11,IRS1,PIK3CB,EIF1AX
PI3K Signaling in B Lymphocytes	2.09	0.261	RAP1B,BLNK,CD81,FYN,Calm1 (includes others),ATF5,NFKBIE,JUN,PPP3CB,FOXO3,CREB1,MRAS,ATF4,PPP3CA,VAV2,IL4R,AKT2,ATF3,RRAS,ITPR2,RALB,CHP1,PLCG1,IKBKE,PLCL2,MALT1,ITPR1,PLCB4,PRKCI,RRAS2,IRS1,VAV3,ITPR3,PIK3CB,ELK1
Natural Killer Cell Signaling	2.08	0.27	RAP1B,FYN,INPPL1,NCK1,OCRL,PAK1,INPP5B,MRAS,PRKCE,FRS2,PRKD3,VAV2,AKT2,PIK3C2A,RRAS,FGFR1,RALB,PLCG1,RAC3,SYNJ2,PRKCI,RRAS2,PTPN11,GAB1,INPP5J,PRKCD,IRS1,VAV3,PIK3CB,INPP5K
Huntington's Disease Signaling	2.07	0.238	CLTB,GNB5,NSF,GNB4,HDAC11,VAMP3,ATF4,PRKD3,FRS2,POLR2L,TP53,AKT2,CAPN6,HDAC4,HDAC8,FGFR1,HSPA9,CLTC,ITPR1,HDAC5,BCL2L1,GAB1,PTPN11,CAPN1,PRKCD,CLTA,IRS1,CASP2,PSME4,CAPN3,CASP4,NGF,TGM2,CASP6,MTOR,GNG11,JUN,CREB1,IGF1R,PRKCE,CASP8,NAPB,CAPN10,EGFR,PIK3C2A,HDAC1,GNAQ,APAF1,HIP1,HSPA2,DNM1,PLCB4,PRKCI,STX16,CYCS,PIK3CB,NCOR2
Paxillin Signaling	2.06	0.267	RAP1B,PTK2B,Actn3,NCK1,PTPN12,ITGB3,ARF6,PAK1,MRAS,VCL,ACTC1,FRS2,ACTA1,ITGB5,ITGB1,PIK3C2A,RRAS,FGFR1,RALB,ITGA6,MAPK12,ITGB2,DOCK1,TLN2,RRAS2,GAB1,ACTA2,PTPN11,IRS1,PIK3CB,ITGA7
Adipogenesis pathway	2.05	0.262	WNT10B,DDIT3,CEBPD,FBXW7,FZD1,MNAT1,RB1,FOXC2,LPIN1,KAT2B,HDAC11,LPL,CTBP2,SMO,CEBPA,STAT5B,KAT2A,FZD2,TP53,PPARG,HDAC4,HDAC8,FGFR1,HDAC1,HDAC5,Kat6b,KDM1A,KAT6A,KLF5,SOX9,FZD5,FGFRL1,PER2,RBBP4
Corticotropin Releasing Hormone Signaling	2.04	0.259	RAP1B,CACNG1,Calm1 (includes others),ARPC5,CACNB3,BRAF,VEGFA,JUN,CREB1,SMO,ATF4,PRKCE,CACNB2,PRKD3,CACNB1,GNAS,ITPR2,MEF2A,GNAQ,PRKAR2A,PLCG1,ITPR1,MAPK12,GNAI2,ADCY9,GNAI3,PRKCI,MEF2D,PRKCD,CACNA2D1,ITPR3,GNAO1,PRKACA,PRKAG2,ELK1
Myc Mediated Apoptosis Signaling	2.02	0.289	RAP1B,TP53,AKT2,PIK3C2A,RRAS,FGFR1,RALB,APAF1,MAPK12,MYC,YWHAQ,FADD,RRAS2,PTPN11,GAB1,IRS1,IGF1R,MRAS,CYCS,PIK3CB,CASP8,FRS2
Glycogen Degradation II	1.99	0.5	PYGM,PGM5,PGM1,AGL,MTAP,PGM2
Regulation of eIF4 and p70S6K Signaling	1.98	0.252	RAP1B,RPS23,PPP2R5B,RPS18,PAIP2,EIF4E,EIF4EBP1,RPS28,MTOR,MRAS,RPS2,RPS17,RPS12,FRS2,RPS24,PABPC1,ITGB1,AKT2,PIK3C2A,RRAS,FGFR1,RALB,EIF4G3,MAPK12,RPS29,PPP2CB,EIF3F,RRAS2,PTPN11,GAB1,PPP2R3A,RPS26,IRS1,EIF4A1,PIK3CB,PPP2R1B,EIF1AX,RPSA,RPS14
IL-15 Signaling	1.98	0.284	RAP1B,STAT5A,AKT2,VCAM1,JAK1,PIK3C2A,RRAS,FGFR1,RALB,TYK2,PLCG1,STAT3,MAPK12,RAC3,BCL2L1,RRAS2,PTPN11,GAB1,IRS1,MRAS,PIK3CB,STAT5B,FRS2
IL-7 Signaling Pathway	1.98	0.278	SOCS1,FOXO4,FYN,STAT5A,AKT2,JAK1,SLC2A1,PIK3C2A,FGFR1,BCL6,MAPK12,CCND1,MYC,MET,JUN,GAB1,CCND3,PTPN11,HGF,IRS1,FOXO3,PIK3CB,STAT5B,FRS2,CDK2
D-myo-inositol (1,3,4)-trisphosphate Biosynthesis	1.97	0.421	SYNJ2,INPP5J,SEC16A,INPP5B,INPPL1,INPP5K,OCRL,PMPCA
Telomerase Signaling	1.97	0.265	RAP1B,PPP2R5B,MYC,RB1,ELF4,HDAC11,MRAS,FRS2,EGFR,ETS1,TP53,AKT2,HDAC4,HDAC8,PIK3C2A,RRAS,FGFR1,DKC1,RALB,HDAC1,HDAC5,PPP2CB,RRAS2,PTPN11,GAB1,PPP2R3A,IRS1,CDKN1A,PIK3CB,PPP2R1B
EGF Signaling	1.96	0.294	AKT2,JAK1,PIK3C2A,ITPR2,FGFR1,SRF,PLCG1,ITPR1,STAT3,MAPK12,MTOR,JUN,PTPN11,GAB1,IRS1,ITPR3,PIK3CB,ELK1,FRS2,EGFR
GNRH Signaling	1.96	0.248	RAP1B,CACNG1,Calm1 (includes others),PTK2B,CACNB3,PAK1,GNG11,JUN,CREB1,MRAS,ATF4,PRKCE,CACNB2,PRKD3,MAP3K2,EGFR,MAP3K14,CACNB1,GNAS,RRAS,ITPR2,EGR1,RALB,GNAQ,PRKAR2A,HBEGF,MMP2,ITPR1,MAPK12,GNAI2,ADCY9,GNAI3,PLCB4,PRKCI,RRAS2,PRKCD,CACNA2D1,ITPR3,PRKACA,PRKAG2,ELK1
Heme Biosynthesis II	1.95	0.556	UROD,UROS,FECH,ALAD,CPOX
Folate Transformations I	1.95	0.556	MTHFD1L,MTHFD2,SHMT1,MTHFD1,SHMT2
G Beta Gamma Signaling	1.95	0.263	RAP1B,CACNG1,CAV2,GNB5,CACNB3,GNB4,PAK1,GNG11,MRAS,PRKCE,CACNB2,PRKD3,EGFR,CACNB1,AKT2,GNAS,RRAS,RALB,GNAQ,PRKAR2A,PLCG1,HBEGF,GNAI2,GNAI3,PRKCI,RRAS2,PRKCD,CACNA2D1,GNAO1,PRKACA,PRKAG2
Semaphorin Signaling in Neurons	1.94	0.314	ITGB1,FYN,CFL1,RHOC,DPYSL3,ROCK2,MET,SEMA3A,RHOV,PAK1,RND3,CFL2,RHOB,RHOD,RHOU,FNBP1
D-myo-inositol (1,4,5,6)-Tetrakisphosphate Biosynthesis	1.94	0.255	DUSP8,PTPN2,PPP2R5B,ACP1,NT5C,NUDT2,HACD2,PTPN12,OCRL,PTPRF,CDC25B,DUSP5,PTPRJ,PHOSPHO1,INPP5B,DUSP10,MTMR2,EYA4,PALD1,DUSP12,PPP3CA,DUSP28,PPFIA1,PPP1R8,DUSP27,PPTC7,PPP4R1,PTPRM,ITPK1,PTPN11,PPP2R3A,NUDT16,DUSP13,PTPN22,NUDT1
D-myo-inositol (3,4,5,6)-tetrakisphosphate Biosynthesis	1.94	0.255	DUSP8,PTPN2,PPP2R5B,ACP1,NT5C,NUDT2,HACD2,PTPN12,OCRL,PTPRF,CDC25B,DUSP5,PTPRJ,PHOSPHO1,INPP5B,DUSP10,MTMR2,EYA4,PALD1,DUSP12,PPP3CA,DUSP28,PPFIA1,PPP1R8,DUSP27,PPTC7,PPP4R1,PTPRM,ITPK1,PTPN11,PPP2R3A,NUDT16,DUSP13,PTPN22,NUDT1
Phagosome Maturation	1.94	0.255	TUBA1B,ATP6V1D,RAB5C,PRDX5,HLA-A,PRDX1,TCIRG1,ATP6V0D2,TUBB,VPS37C,TUBB2B,CTSF,CTSV,NSF,Dync1i2,CTSH,RAB7B,VAMP3,RILP,NAPB,M6PR,ATP6V0E2,TUBB4B,TUBB2A,TUBA4A,ATP6V0A1,ATP6V1E1,TUBD1,TUBA1A,TUBB6,ATP6V0A2,CTSB,VPS37B,STX16,EEA1
Tight Junction Signaling	1.92	0.248	TGFBR1,MYL2,PPP2R5B,CDK4,CTNNA1,JAM2,MYL6B,IGSF5,SMURF1,TGFBR2,NSF,JUN,CEBPA,TGFB2,VAMP3,CSTF2,MYL4,VCL,TNFRSF1B,ACTC1,ACTA1,NAPB,VASP,AKT2,TJP2,TJP1,PRKAR2A,YBX3,CNKSR3,MYL1,PPP2CB,PRKCI,ACTA2,PPP2R3A,PRKACA,MYH3,PRKAG2,TGFB3,STX16,PPP2R1B
Endothelin-1 Signaling	1.92	0.242	RAP1B,CASP4,BRAF,MYC,CASP6,HMOX1,JUN,MRAS,PRKCE,ECE1,CASP8,PRKD3,FRS2,PLA2G16,GNAS,PLD3,PIK3C2A,RRAS,ITPR2,FGFR1,PTGS1,RALB,GNAQ,PLCG1,PLCL2,ITPR1,MAPK12,GNAI2,ADCY9,PLA2G4A,PLA2G6,GNAI3,PLCB4,RRAS2,PRKCI,ARAF,GAB1,PTPN11,PRKCD,IRS1,CASP2,ITPR3,SHC2,GNAO1,EDNRA,PIK3CB
Induction of Apoptosis by HIV1	1.91	0.3	TP53,MAP3K14,CXCR4,NFKBIE,APAF1,SLC25A3,IKBKE,MAPK12,DFFA,FADD,BCL2L1,TRAF2,RIPK1,HTRA2,CYCS,CASP8,SLC25A5,TNFRSF1B
RhoA Signaling	1.9	0.261	PTK2B,ARPC1B,MYL2,CDC42EP5,ARPC5,PIP4K2B,MYL6B,CDC42EP2,ROCK2,Ppp1r12b,CFL2,BAIAP2,IGF1R,PFN2,MYL4,DLC1,ACTC1,ACTA1,MYL12B,PI4KA,MYL12A,NGEF,CFL1,NRP2,MYLPF,WASF1,MYL1,PKN1,ACTA2,RND3,PLEKHG5
Oncostatin M Signaling	1.89	0.333	RAP1B,TIMP3,STAT5A,JAK1,RRAS2,RRAS,RALB,TYK2,MRAS,STAT3,PLAU,STAT5B,ELK1
P2Y Purigenic Receptor Signaling Pathway	1.89	0.254	RAP1B,GNB5,ITGB3,MYC,GNB4,GNG11,JUN,CREB1,MRAS,ATF4,PRKCE,FRS2,PRKD3,AKT2,PIK3C2A,RRAS,FGFR1,RALB,GNAQ,PRKAR2A,PLCG1,PLCL2,GNAI2,ADCY9,GNAI3,PLCB4,PRKCI,RRAS2,GAB1,PTPN11,PRKCD,IRS1,PRKACA,PRKAG2,PIK3CB
Erythropoietin Signaling	1.88	0.276	RAP1B,SOCS1,STAT5A,AKT2,PIK3C2A,RRAS,FGFR1,NFKBIE,RALB,PLCG1,PRKCI,JUN,RRAS2,PTPN11,GAB1,PRKCD,IRS1,MRAS,PRKCE,PIK3CB,STAT5B,ELK1,FRS2,PRKD3
VDR/RXR Activation	1.88	0.282	IGFBP6,SERPINB1,BGLAP,HES1,THBD,KLF4,PSMC5,PRKCI,RUNX2,PRKCD,CDKN1A,MXD1,TGFB2,CEBPA,PRKCE,CD14,VDR,NCOR2,SEMA3B,CST6,RXRA,PRKD3
ErbB Signaling	1.87	0.267	RAP1B,NCK1,MTOR,PAK1,JUN,MRAS,PRKCE,ERBB2,FRS2,PRKD3,EGFR,PIK3C2A,RRAS,FGFR1,RALB,PLCG1,HBEGF,MAPK12,PRKCI,RRAS2,PTPN11,GAB1,IRS1,PRKCD,PIK3CB,ELK1,EREG
UVB-Induced MAPK Signaling	1.86	0.292	TP53,PIK3C2A,FGFR1,MAPK12,EIF4E,EIF4EBP1,MTOR,PRKCI,JUN,H3F3A/H3F3B,PTPN11,GAB1,PRKCD,IRS1,PRKCE,PIK3CB,FRS2,PRKD3,EGFR
Sumoylation Pathway	1.85	0.272	ETS1,TP53,RHOC,ARHGDIG,HDAC1,RAN,ZEB1,MAPK12,UBA2,ARHGDIB,RHOV,RNF4,JUN,RHOB,KDM1A,RND3,RCC1,RHOD,CTBP2,RHOU,CEBPA,SLC19A1,ZNF217,FNBP1,UBE2I
Role of NFAT in Regulation of the Immune Response	1.85	0.242	RAP1B,BLNK,FYN,Calm1 (includes others),HLA-A,NFKBIE,GNB5,CD28,GNB4,GNG11,JUN,PPP3CB,HLA-DMA,MRAS,XPO1,FRS2,PPP3CA,ORAI1,AKT2,GNAS,PIK3C2A,RRAS,ITPR2,FGFR1,CHP1,RALB,MEF2A,GNAQ,PLCG1,IKBKE,ITPR1,GNAI2,RCAN1,GNAI3,PLCB4,RRAS2,GAB1,PTPN11,IRS1,MEF2D,ITPR3,GNAO1,PIK3CB,RCAN2
ErbB2-ErbB3 Signaling	1.85	0.284	RAP1B,STAT5A,PIK3C2A,RRAS,FGFR1,TYK2,RALB,STAT3,CCND1,MYC,JUN,RRAS2,PTPN11,GAB1,IRS1,MRAS,PIK3CB,ERBB2,STAT5B,ELK1,FRS2
Regulation of Cellular Mechanics by Calpain Protease	1.83	0.295	RAP1B,ITGB1,CAPN6,RRAS,RALB,Actn3,CDK4,CCND1,RB1,RRAS2,TLN2,CAPN1,MRAS,VCL,CDK2,CAPN10,EGFR,CAPN3
IL-2 Signaling	1.82	0.286	RAP1B,SOCS1,STAT5A,AKT2,JAK1,PTK2B,PIK3C2A,RRAS,FGFR1,RALB,JUN,RRAS2,PTPN11,GAB1,IRS1,MRAS,PIK3CB,STAT5B,ELK1,FRS2
Iron homeostasis signaling pathway	1.82	0.254	JAK1,ATP6V1D,SLC46A1,TCIRG1,ATP6V0D2,CP,SLC39A14,ARNT,HMOX1,PDGFRA,SLC40A1,STAT5B,NFS1,BMP1,EGFR,PDGFRB,STAT5A,ATP6V0E2,HSPA9,TYK2,IL6R,SLC25A37,STAT3,LYRM4,ATP6V0A1,ATP6V1E1,FTL,SLC48A1,HSCB,ATP6V0A2,FECH,TFRC,STEAP3
Cdc42 Signaling	1.8	0.252	FGD3,ARPC1B,MYL2,HLA-A,CDC42EP5,ARPC5,MYL6B,CDC42EP2,EXOC6,IQGAP1,CLIP1,Ppp1r12b,HLA-G,PAK1,JUN,CFL2,HLA-DMA,BAIAP2,MYL4,MYL12B,MYL12A,VAV2,ITGB1,H2-T9,CFL1,MYLPF,TNK2,MAPK12,MYL1,APC,WIPF1,PRKCI,EXOC4,HLA-E
Fc Epsilon RI Signaling	1.79	0.256	RAP1B,FYN,INPPL1,OCRL,INPP5B,MRAS,PRKCE,FRS2,PRKD3,VAV2,AKT2,PIK3C2A,RRAS,FGFR1,RALB,PLCG1,MAPK12,RAC3,SYNJ2,PLA2G6,PLA2G4A,PRKCI,RRAS2,GAB1,PTPN11,INPP5J,PRKCD,IRS1,VAV3,PIK3CB,INPP5K
Aldosterone Signaling in Epithelial Cells	1.79	0.244	CRYAB,HSPB8,PIP4K2B,DNAJB2,DNAJC15,DNAJC28,HSPE1,PRKCE,PRKD3,DNAJC16,FRS2,PI4KA,PIK3C2A,ITPR2,FGFR1,SLC12A2,DNAJC27,HSPA9,PLCG1,PLCL2,HSPD1,ITPR1,HSPA2,HSPA12A,DNAJC21,PLCB4,PRKCI,GAB1,PTPN11,HSCB,DNAJB11,PRKCD,IRS1,ITPR3,DNAJC18,HSPA13,PIK3CB,HSPB7,DNAJB5,HSPB1
Cholesterol Biosynthesis I	1.79	0.462	SQLE,DHCR7,EBP,DHCR24,MSMO1,TM7SF2
γ-glutamyl Cycle	1.79	0.462	OPLAH,GCLC,GCLM,GSS,ANPEP,GGACT
Cholesterol Biosynthesis II (via 24,25-dihydrolanosterol)	1.79	0.462	SQLE,DHCR7,EBP,DHCR24,MSMO1,TM7SF2
Cholesterol Biosynthesis III (via Desmosterol)	1.79	0.462	SQLE,DHCR7,EBP,DHCR24,MSMO1,TM7SF2
Glutathione-mediated Detoxification	1.79	0.375	GSTM1,MGST1,MGST2,GSTM5,GSTA5,Gsta4,ANPEP,MGST3,GSTO1
Superpathway of D-myo-inositol (1,4,5)-trisphosphate Metabolism	1.79	0.375	SYNJ2,INPP5J,SEC16A,INPP5B,IMPA2,INPPL1,INPP5K,OCRL,PMPCA
Renal Cell Carcinoma Signaling	1.79	0.274	ETS1,RAP1B,RAPGEF1,AKT2,PIK3C2A,SLC2A1,RRAS,FGFR1,RALB,ARNT,MET,VEGFA,PAK1,JUN,RRAS2,PTPN11,GAB1,HGF,IRS1,MRAS,EGLN3,PIK3CB,FRS2
Renin-Angiotensin Signaling	1.78	0.254	RAP1B,PTK2B,PAK1,JUN,MRAS,PRKCE,FRS2,PRKD3,PIK3C2A,RRAS,ITPR2,FGFR1,RALB,GNAQ,PRKAR2A,PLCG1,STAT3,ITPR1,MAPK12,ADCY9,PRKCI,RRAS2,GAB1,PTPN11,PRKCD,IRS1,ITPR3,SHC2,PRKACA,PRKAG2,PIK3CB,ELK1
IL-6 Signaling	1.77	0.252	RAP1B,SOCS1,NFKBIE,SRF,VEGFA,JUN,MRAS,TNFRSF1B,FRS2,MAP3K14,AKT2,PIK3C2A,RRAS,FGFR1,IL6R,RALB,IKBKE,STAT3,IL1R1,MAPK12,COL1A1,IL18,TRAF2,RRAS2,GAB1,PTPN11,IRS1,CD14,PIK3CB,HSPB7,ELK1,MAP4K4,HSPB1
D-myo-inositol-5-phosphate Metabolism	1.76	0.245	DUSP8,PTPN2,PPP2R5B,ACP1,PIP4K2B,NT5C,NUDT2,HACD2,PTPN12,OCRL,PTPRF,CDC25B,DUSP5,PTPRJ,PHOSPHO1,INPP5B,DUSP10,MTMR2,EYA4,PALD1,DUSP12,PPP3CA,DUSP28,PPFIA1,PPP1R8,DUSP27,PPTC7,PLCG1,PPP4R1,PTPRM,ITPK1,PLCB4,PTPN11,PPP2R3A,NUDT16,DUSP13,PTPN22,NUDT1
p70S6K Signaling	1.76	0.25	RAP1B,JAK1,PPP2R5B,YWHAQ,MTOR,MRAS,PRKCE,EEF2K,FRS2,PRKD3,EGFR,IL4R,AKT2,PIK3C2A,RRAS,FGFR1,RALB,GNAQ,PLCG1,PLCL2,GNAI2,GNAI3,PPP2CB,PLCB4,PRKCI,RRAS2,GAB1,PTPN11,PPP2R3A,PRKCD,IRS1,MAPT,PIK3CB,PPP2R1B
Actin Cytoskeleton Signaling	1.75	0.232	MYL2,ARPC5,PIP4K2B,MYL6B,Ppp1r12b,ROCK2,PAK1,CFL2,BAIAP2,MRAS,MYL4,SSH2,FRS2,ACTA1,CFL1,RRAS,FGFR1,RALB,WASF1,GSN,RAC3,APC,DOCK1,TLN2,ACTA2,GAB1,PTPN11,IRS1,MYH3,CD14,RAP1B,FGD3,FN1,ARPC1B,Actn3,TRIO,IQGAP1,PDGFC,PFN2,VCL,ACTC1,MYL12B,MYL12A,VAV2,ITGB1,PIK3C2A,MYLPF,MYL1,FGF21,RRAS2,VAV3,PIK3CB
Human Embryonic Stem Cell Pluripotency	1.75	0.248	WNT10B,TGFBR1,FZD1,NGF,PDGFC,TGFBR2,TGFB2,SMO,MRAS,PDGFRA,FZD2,FRS2,BMP1,PDGFRB,AKT2,GNAS,S1PR2,PIK3C2A,WNT9A,FGFR1,DVL1,SMAD7,TCF7L1,APC,INHBA,GAB1,PTPN11,IRS1,S1PR1,TGFB3,LEF1,FZD5,PIK3CB,FGFRL1,Tcf7
Heme Biosynthesis from Uroporphyrinogen-III I	1.73	0.75	UROD,FECH,CPOX
Spermine and Spermidine Degradation I	1.73	0.75	PAOX,SAT1,SAT2
Glutathione Redox Reactions II	1.73	0.75	GSR,TXNDC12,GLRX
NAD Biosynthesis III	1.73	0.75	NMNAT1,NAMPT,Nmnat3
dTMP De Novo Biosynthesis	1.73	0.75	TYMS,SHMT1,SHMT2
N-acetylglucosamine Degradation II	1.73	0.75	GNPDA1,AMDHD2,GNPDA2
Role of Macrophages, Fibroblasts and Endothelial Cells in Rheumatoid Arthritis	1.72	0.223	SOCS1,TRAF3,WNT10B,IL17RC,CCND1,VEGFA,ROCK2,MYC,PROK1,TRAF4,MRAS,ATF4,PRKD3,FRS2,FZD2,MAP3K14,AKT2,MIF,RRAS,WNT9A,FGFR1,RALB,IL6R,PLCL2,STAT3,APC,IL18,PTPN11,GAB1,PRKCD,IRS1,GNAO1,LEF1,FZD5,Tcf7,RAP1B,Calm1 (includes others),FN1,NFKBIE,CEBPD,CEBPZ,FZD1,PDGFC,PGF,JUN,PPP3CB,CREB1,CEBPA,SMO,PRKCE,TNFRSF1B,PPP3CA,VCAM1,PIK3C2A,DVL1,CHP1,GNAQ,PLCG1,IKBKE,TCF7L1,IL1R1,PLCB4,TRAF2,RRAS2,PRKCI,RIPK1,PIK…
Role of JAK1 and JAK3 in γc Cytokine Signaling	1.72	0.276	BLNK,RAP1B,SOCS1,STAT5A,IL4R,JAK1,PIK3C2A,PTK2B,RRAS,FGFR1,RALB,STAT3,TSLP,RRAS2,GAB1,PTPN11,IRS1,MRAS,PIK3CB,STAT5B,FRS2
Type II Diabetes Mellitus Signaling	1.69	0.243	SOCS1,CACNG1,PRKAB2,NFKBIE,SOCS6,CACNB3,MTOR,ACSL5,PRKAA2,SOCS2,PRKCE,CACNB2,TNFRSF1B,FRS2,PRKD3,PPARG,MAP3K14,ACSL3,AKT2,CACNB1,PIK3C2A,FGFR1,IKBKE,MAPK12,SMPD2,TRAF2,PRKCI,GAB1,PTPN11,PRKCD,IRS1,CACNA2D1,PRKAG2,PIK3CB,SLC27A1,SOCS7,ACSL1
Phosphatidylcholine Biosynthesis I	1.68	0.571	CEPT1,CHKA,CHPT1,PCYT1A
Inhibition of Angiogenesis by TSP1	1.68	0.333	TP53,HSPG2,VEGFA,TGFBR2,FYN,AKT2,TGFBR1,JUN,THBS1,SDC2,MAPK12
Role of JAK family kinases in IL-6-type Cytokine Signaling	1.67	0.36	SOCS1,STAT5A,JAK1,PTPN11,TYK2,IL6R,STAT3,STAT5B,MAPK12
Gα12/13 Signaling	1.66	0.246	RAP1B,PTK2B,MYL2,NFKBIE,MYL6B,ROCK2,JUN,MRAS,MYL4,FRS2,CDH13,MYL12B,MYL12A,VAV2,AKT2,PIK3C2A,RRAS,MYLPF,FGFR1,RALB,MEF2A,IKBKE,CDH15,MAPK12,MYL1,CDH2,RRAS2,GAB1,PTPN11,IRS1,MEF2D,VAV3,PIK3CB,ELK1
Ephrin A Signaling	1.66	0.288	VAV2,FYN,NGEF,PIK3C2A,CFL1,FGFR1,EFNA1,ROCK2,PAK1,PTPN11,GAB1,CFL2,VAV3,IRS1,ADAM10,PIK3CB,FRS2
Salvage Pathways of Pyrimidine Ribonucleotides	1.65	0.264	PYCR3,DMPK,AKT2,CDADC1,NME5,UPP1,CDK4,GRK5,CDA,PKN1,BRAF,AK1,PAK1,PRKX,CDK8,ARAF,PRKCD,GRK6,PRKAA2,PRKCE,UCK2,ADPGK,CDK2,ACVR2A
Retinoic acid Mediated Apoptosis Signaling	1.64	0.304	PARP6,APAF1,ZC3HAV1,PARP3,RARG,PARP9,FADD,TIPARP,CYCS,PARP11,CASP8,RXRA,TNFRSF10A,IFNAR1
Sertoli Cell-Sertoli Cell Junction Signaling	1.62	0.236	RAP1B,TUBA1B,TGFBR3,Actn3,ILK,CTNNA1,JAM2,IGSF5,PRKG2,TUBB,TUBB2B,JUN,TJAP1,SORBS1,MRAS,MTMR2,VCL,ACTC1,ACTA1,MAP3K2,ITGB1,MAP3K14,AKT2,TJP2,RRAS,TUBB4B,TJP1,TUBB2A,RALB,TUBA4A,PRKAR2A,YBX3,MAPK12,EPN2,RRAS2,TUBA1A,ACTA2,TUBB6,PRKACA,PRKAG2,TGFB3,ELK1
Pyridoxal 5'-phosphate Salvage Pathway	1.62	0.281	PDXK,DMPK,AKT2,CDK4,GRK5,PKN1,BRAF,PAK1,PRKX,CDK8,ARAF,PRKCD,GRK6,PRKAA2,PRKCE,ADPGK,CDK2,ACVR2A
Glycogen Degradation III	1.62	0.429	PYGM,PGM5,PGM1,AGL,MTAP,PGM2
HIF1α Signaling	1.61	0.25	RAP1B,MMP14,MMP16,PDGFC,PGF,ARNT,VEGFA,JUN,PROK1,MRAS,EGLN3,MMP11,FRS2,TP53,AKT2,PIK3C2A,MMP28,SLC2A1,RRAS,FGFR1,COPS5,RALB,MMP2,MAPK12,RRAS2,GAB1,PTPN11,IRS1,PIK3CB,LDHA
FLT3 Signaling in Hematopoietic Progenitor Cells	1.59	0.261	RAP1B,STAT5A,GAB2,AKT2,PIK3C2A,RRAS,FGFR1,RALB,STAT3,MAPK12,EIF4E,EIF4EBP1,MTOR,RRAS2,PTPN11,GAB1,IRS1,CREB1,MRAS,ATF4,PIK3CB,STAT5B,ELK1,FRS2
Bladder Cancer Signaling	1.59	0.261	RAP1B,TP53,MMP28,RRAS,MMP14,MMP16,RALB,CDK4,MMP2,CCND1,PDGFC,PGF,MYC,VEGFA,RB1,FGF21,RRAS2,PROK1,THBS1,CDKN1A,MRAS,MMP11,ERBB2,EGFR
Tumoricidal Function of Hepatic Natural Killer Cells	1.56	0.364	M6PR,FADD,CASP6,SERPINB9,APAF1,CYCS,CASP8,DFFA
Antiproliferative Role of TOB in T Cell Signaling	1.55	0.346	PABPC1,TGFBR2,RB1,TGFBR1,TGFB2,TGFB3,TOB1,CDC34,CDK2
Leukocyte Extravasation Signaling	1.54	0.229	RAP1B,PTK2B,MMP14,MMP16,Actn3,JAM2,CTNNA1,ITGB3,ROCK2,PRKCE,MMP11,RASSF5,VCL,PRKD3,ACTC1,DLC1,FRS2,ACTA1,VASP,TIMP2,VAV2,ITGB1,TIMP3,VCAM1,PIK3C2A,MMP28,CXCR4,FGFR1,ITGA6,PLCG1,MMP2,MAPK12,GNAI2,ITGB2,GNAI3,WIPF1,EDIL3,PRKCI,GAB1,ACTA2,PTPN11,PRKCD,VAV3,IRS1,FER,PIK3CB,CTNND1
Assembly of RNA Polymerase I Complex	1.52	0.455	POLR1C,TAF1A,POLR1E,TAF1C,UBTF
Purine Nucleotides De Novo Biosynthesis II	1.52	0.455	ADSS,ADSSL1,IMPDH1,PFAS,ATIC
UDP-N-acetyl-D-galactosamine Biosynthesis II	1.52	0.455	HK1,GPI,GNPNAT1,GNPDA1,GNPDA2
eNOS Signaling	1.52	0.235	CHRNA1,Calm1 (includes others),PRKAB2,CHRNB1,SLC7A1,PDGFC,PGF,VEGFA,BDKRB2,PROK1,PRKAA2,PRKCE,CASP8,FRS2,PRKD3,AKT2,AQP5,GNAS,PIK3C2A,ITPR2,FGFR1,HSPA9,GNAQ,PRKAR2A,PLCG1,ITPR1,HSPA2,CHRND,ADCY9,CHRNG,PRKCI,GAB1,PTPN11,PRKCD,IRS1,ITPR3,PRKACA,PRKAG2,PIK3CB
UDP-D-xylose and UDP-D-glucuronate Biosynthesis	1.51	1	UXS1,UGDH
Spermine Biosynthesis	1.51	1	SMS,AMD1
Uridine-5'-phosphate Biosynthesis	1.51	1	CAD,UMPS
Spermidine Biosynthesis I	1.51	1	SRM,AMD1
Glycine Biosynthesis I	1.51	1	SHMT1,SHMT2
Mechanisms of Viral Exit from Host Cells	1.51	0.308	PRKCI,ACTA2,PRKCD,SH3GLB1,XPO1,PRKCE,SH3GLB2,ACTC1,PRKD3,LMNB1,VPS37C,ACTA1
Hypoxia Signaling in the Cardiovascular System	1.5	0.267	TP53,UBE2Q1,COPS5,NFKBIE,NQO1,UBE2D1,UBE2L6,ARNT,VEGFA,UBE2G2,JUN,UBE2H,CREB1,UBE2V1,HIF1AN,ATF4,CDC34,LDHA,UBE2E1,UBE2I
Lymphotoxin β Receptor Signaling	1.49	0.273	MAP3K14,TRAF3,AKT2,VCAM1,PIK3C2A,RELB,FGFR1,APAF1,IKBKE,BCL2L1,TRAF2,PTPN11,GAB1,IRS1,TRAF4,CYCS,PIK3CB,FRS2
Role of BRCA1 in DNA Damage Response	1.48	0.262	TP53,RBBP8,FANCF,MDC1,SMARCD2,SMARCD1,UIMC1,SMARCD3,FANCL,FANCE,RB1,E2F6,BRD7,MSH2,SMARCA2,CDKN1A,SMARCB1,SLC19A1,ATR,SMARCC1,CHEK2
Glucocorticoid Receptor Signaling	1.48	0.216	BGLAP,TGFBR1,JAK1,PRKAB2,PBX1,SMARCD2,MNAT1,TSC22D3,TGFBR2,BAG1,SMARCB1,MRAS,FRS2,POLR2L,MAP3K14,STAT5A,AKT2,RRAS,FGFR1,HSPA9,RALB,KRT80,STAT3,MAPK12,MED14,SMARCD3,BCL2L1,PTPN11,GAB1,SMARCA2,IRS1,PRKACA,TGFB3,UBE2I,RAP1B,NFKBIE,GTF2A1,KAT2B,JUN,PPP3CB,PCK2,ANXA1,FOXO3,CREB1,PRKAA2,CEBPA,TGFB2,STAT5B,PPP3CA,ADRB2,VCAM1,PIK3C2A,TAF5L,CHP1,SMARCD1,IKBKE,HSPA2,BRD7,TRAF2,RRAS2,GTF2E1,CDKN1A,FKBP4,PRK…
Vitamin-C Transport	1.46	0.4	SLC2A1,TXN,GLRX,TXNRD1,GSTO1,TXNRD3
Glycolysis I	1.44	0.348	ENO1,GPI,PGAM1,ENO3,PGAM2,ALDOA,PFKL,PFKM
nNOS Signaling in Skeletal Muscle Cells	1.43	0.3	SNTB2,CACNG1,CHRNA1,CACNB1,Calm1 (includes others),SNTA1,SNTB1,CACNA2D1,CACNB2,CACNB3,DAG1,CAPN3
Chemokine Signaling	1.41	0.264	RAP1B,Calm1 (includes others),PTK2B,CFL1,MYL2,RRAS,CXCR4,RALB,GNAQ,PLCG1,MAPK12,ROCK2,Ppp1r12b,GNAI2,GNAI3,PLCB4,JUN,RRAS2,MRAS
CTLA4 Signaling in Cytotoxic T Lymphocytes	1.4	0.253	FYN,AP2A1,AKT2,PIK3C2A,HLA-A,FGFR1,AP1S2,CLTB,PPP2R5B,CLTC,PLCG1,AP1S1,PPP2CB,CD28,PTPN11,GAB1,PPP2R3A,CLTA,IRS1,PIK3CB,PPP2R1B,FRS2,PTPN22
TGF-β Signaling	1.4	0.253	RAP1B,RUNX3,TGFBR1,RRAS,HDAC1,RALB,SMAD7,PITX2,MAPK12,INHBB,TGIF1,INHBA,SMURF1,TGFBR2,JUN,RRAS2,RUNX2,TGFB3,MRAS,TGFB2,VDR,TFE3,ACVR2A
Tetrahydrofolate Salvage from 5,10-methenyltetrahydrofolate	1.39	0.6	MTHFD1L,MTHFD2,MTHFD1
CMP-N-acetylneuraminate Biosynthesis I (Eukaryotes)	1.39	0.6	GNE,NANP,NANS
NAD Salvage Pathway III	1.39	0.6	NMNAT1,NMRK2,Nmnat3
Glycogen Biosynthesis II (from UDP-D-Glucose)	1.39	0.6	GYS1,UGP2,GYG1
Rapoport-Luebering Glycolytic Shunt	1.39	0.6	PGAM1,TIGAR,PGAM2
Galactose Degradation I (Leloir Pathway)	1.39	0.6	GALK2,GALK1,GALM
nNOS Signaling in Neurons	1.38	0.289	CAPN6,Calm1 (includes others),CHP1,PFKM,PRKCI,PPP3CB,CAPN1,PRKCD,PRKCE,PRKD3,PPP3CA,CAPN10,CAPN3
Choline Biosynthesis III	1.35	0.417	HMOX1,CEPT1,PLD3,CHPT1,PCYT1A
Rac Signaling	1.35	0.24	RAP1B,PTK2B,ARPC1B,ARPC5,PIP4K2B,IQGAP1,PAK1,JUN,CFL2,BAIAP2,MRAS,FRS2,PI4KA,ITGB1,PIK3C2A,CFL1,RRAS,FGFR1,RALB,WASF1,MCF2L,PRKCI,RRAS2,GAB1,PTPN11,IRS1,PIK3CB,SH3RF1,ELK1
Role of p14/p19ARF in Tumor Suppression	1.35	0.293	TP53,NPM1,RB1,GAB1,PTPN11,PIK3C2A,NPM3,IRS1,FGFR1,PIK3CB,UBTF,FRS2
Neuregulin Signaling	1.35	0.25	RAP1B,ITGB1,STAT5A,AKT2,RRAS,RALB,PLCG1,HBEGF,MYC,MTOR,PRKCI,RRAS2,PTPN11,PRKCD,RPS6KB2,MRAS,PRKCE,ERBB2,STAT5B,ELK1,PRKD3,EREG,EGFR
VEGF Family Ligand-Receptor Interactions	1.35	0.25	RAP1B,AKT2,PIK3C2A,NRP2,RRAS,FGFR1,RALB,PLCG1,PGF,VEGFA,PLA2G4A,PLA2G6,PRKCI,RRAS2,PTPN11,GAB1,PRKCD,IRS1,MRAS,PRKCE,PIK3CB,FRS2,PRKD3
GP6 Signaling Pathway	1.34	0.237	RAP1B,FYN,Calm1 (includes others),ITGB3,COL1A2,COL5A1,COL6A1,SCHIP1,LAMB1,PRKCE,COL11A2,FRS2,PRKD3,LAMA5,COL5A2,AKT2,PIK3C2A,COL6A2,FGFR1,COL4A3BP,ITPR1,COL1A1,PRKCI,GAB1,PTPN11,LAMA4,PRKCD,IRS1,ADAM10,PIK3CB,COL7A1
Ceramide Signaling	1.34	0.247	RAP1B,AKT2,S1PR2,PIK3C2A,RRAS,FGFR1,RALB,PPP2R5B,CERK,SMPD2,PPP2CB,JUN,RRAS2,PTPN11,GAB1,PPP2R3A,IRS1,S1PR1,MRAS,PIK3CB,CYCS,TNFRSF1B,PPP2R1B,FRS2
IL-22 Signaling	1.33	0.333	STAT5A,AKT2,JAK1,TYK2,IL10RB,STAT3,STAT5B,MAPK12
Type I Diabetes Mellitus Signaling	1.33	0.245	SOCS1,MAP3K14,JAK1,HLA-A,NFKBIE,SOCS6,APAF1,IFNGR2,IKBKE,HSPD1,IL1R1,MAPK12,HLA-G,FADD,CD28,TRAF2,RIPK1,HLA-DMA,SOCS2,CYCS,CASP8,TNFRSF1B,SOCS7,CPE,HLA-E
Opioid Signaling Pathway	1.33	0.219	CACNG1,CLTB,SRF,MYC,MRAS,ATF4,PRKD3,CACNB1,AKT2,RRAS,ITPR2,CLTC,RALB,GRK5,ITPR1,MAPK12,RAC3,ADCY9,CLTA,PRKCD,CACNA2D1,GNAO1,ITPR3,PRKACA,GRK6,RGS11,RAP1B,FYN,AP2A1,Calm1 (includes others),RGS3,CACNB3,BRAF,YES1,GNG11,PPP3CB,CREB1,RPS6KB2,PRKCE,CACNB2,PDK1,PPP3CA,SIGMAR1,GNAS,PRKAR2A,FRK,GNAI2,GNAI3,PRKCI,RRAS2,PRKAG2,ELK1
γ-linolenate Biosynthesis II (Animals)	1.33	0.375	ACSL3,ACSL5,SLC27A1,CYB5A,ACSL1,FADS1
Inhibition of Matrix Metalloproteases	1.32	0.297	HSPG2,TIMP3,MMP28,SDC2,MMP14,MMP16,RECK,ADAM10,MMP2,MMP11,TIMP2
Caveolar-mediated Endocytosis Signaling	1.31	0.261	ITGB1,FLNB,FYN,RAB5C,ITSN1,HLA-A,ITGA6,FLOT1,ITGB3,ITGB2,ACTA2,FLNC,ACTC1,ITGA7,ACTA1,ITGB5,MAP3K2,EGFR
Factors Promoting Cardiogenesis in Vertebrates	1.31	0.25	TGFBR1,MYL2,TGFBR3,DVL1,FZD1,TCF7L1,APC,TGFBR2,PRKCI,PRKCD,TGFB3,SMO,TGFB2,PRKCE,FZD5,LEF1,PRKD3,Tcf7,FZD2,CDK2,ACVR2A,BMP1
NGF Signaling	1.31	0.238	RAP1B,TRIO,NGF,ROCK2,CREB1,TRAF4,MRAS,RPS6KB2,ATF4,FRS2,MAP3K2,TP53,MAP3K14,AKT2,PIK3C2A,RRAS,FGFR1,RALB,PLCG1,IKBKE,MAPK12,SMPD2,RRAS2,PTPN11,GAB1,IRS1,PRKCD,PIK3CB,ELK1
Wnt/β-catenin Signaling	1.27	0.226	WNT10B,TGFBR1,TGFBR3,PPP2R5B,ILK,FZD1,RARG,CCND1,TGFBR2,MYC,JUN,TGFB2,SMO,RUVBL2,FZD2,SOX4,TP53,GJA1,AKT2,WNT9A,DVL1,HDAC1,GNAQ,TCF7L1,APC,PPP2CB,CDH2,DVL2,PPP2R3A,GNAO1,TGFB3,SOX9,FZD5,DVL3,LEF1,PPP2R1B,Tcf7,ACVR2A
Th1 and Th2 Activation Pathway	1.27	0.226	SOCS1,TGFBR1,JAK1,CHD4,HLA-A,TGFBR3,MAF,PSEN2,TGFBR2,CD28,JUN,HLA-DMA,STAT5B,FRS2,RUNX3,STAT5A,IL4R,DLL1,NOTCH3,PIK3C2A,CXCR4,FGFR1,TYK2,IL6R,IFNGR2,STAT3,TSLP,ITGB2,IL18,GAB1,PTPN11,IRS1,IL10RB,S1PR1,PIK3CB,JAG1,IFNAR1,ACVR2A
Leucine Degradation I	1.25	0.444	BCAT1,BCAT2,IVD,HMGCL
GDP-glucose Biosynthesis	1.25	0.444	HK1,PGM5,PGM1,PGM2
Amyotrophic Lateral Sclerosis Signaling	1.24	0.239	TP53,CAPN6,RAB5C,GDNF,PIK3C2A,FGFR1,APAF1,PDGFC,GRIA4,PGF,VEGFA,BCL2L1,PAK1,GRIK5,PTPN11,GAB1,PROK1,CAPN1,IRS1,GLUL,CYCS,PIK3CB,FRS2,PPP3CA,CAPN10,CAPN3
PCP pathway	1.24	0.262	WNT10B,WNT9A,DVL1,JUNB,FZD1,MAPK12,ROCK2,DVL2,JUN,SMO,PFN2,FZD5,DVL3,PRICKLE1,FZD2,LGR4
Cellular Effects of Sildenafil (Viagra)	1.23	0.234	CACNG1,KCNN4,Calm1 (includes others),MYL2,MYL6B,PRKG2,Ppp1r12b,PDE3B,MYL4,ACTC1,ACTA1,MYL12B,MYL12A,GNAS,ITPR2,MYLPF,PRKAR2A,PLCG1,PLCL2,ITPR1,MYL1,ADCY9,PLCB4,ACTA2,ITPR3,PRKACA,MYH3,PRKAG2,PDE5A
CREB Signaling in Neurons	1.23	0.219	RAP1B,CACNG1,Calm1 (includes others),GNB5,CACNB3,GRIA4,GNB4,GRIK5,GNG11,CREB1,MRAS,ATF4,PRKCE,CACNB2,PRKD3,FRS2,POLR2L,AKT2,CACNB1,GNAS,PIK3C2A,RRAS,ITPR2,FGFR1,RALB,PRKAR2A,GNAQ,PLCG1,PLCL2,ITPR1,GNAI2,ADCY9,GNAI3,PLCB4,RRAS2,PRKCI,GAB1,PTPN11,PRKCD,IRS1,CACNA2D1,ITPR3,GNAO1,PRKACA,PRKAG2,PIK3CB,ELK1
IL-10 Signaling	1.22	0.258	MAP3K14,IL4R,JAK1,NFKBIE,TYK2,BLVRB,IKBKE,IL1R1,STAT3,MAPK12,HMOX1,IL18,JUN,IL10RB,CD14,ELK1,MAP4K4
Role of JAK1, JAK2 and TYK2 in Interferon Signaling	1.22	0.333	SOCS1,JAK1,PTPN2,TYK2,IFNGR2,STAT3,IFNAR1
Putrescine Degradation III	1.22	0.333	ALDH1L2,ALDH3A2,SAT1,SAT2,ALDH3A1,ALDH9A1,MAOA
Mitochondrial L-carnitine Shuttle Pathway	1.2	0.353	ACSL3,CPT1A,ACSL5,CPT2,SLC27A1,ACSL1
Th2 Pathway	1.19	0.23	TGFBR1,JAK1,CHD4,HLA-A,TGFBR3,MAF,PSEN2,TGFBR2,CD28,JUN,HLA-DMA,STAT5B,FRS2,RUNX3,STAT5A,IL4R,DLL1,NOTCH3,PIK3C2A,CXCR4,FGFR1,TYK2,TSLP,ITGB2,PTPN11,GAB1,IRS1,S1PR1,PIK3CB,JAG1,ACVR2A
ATM Signaling	1.17	0.24	TP53,GADD45B,GADD45G,PPP2R5B,RBBP8,MDC1,ZEB1,TDP1,CBX5,MAPK12,PPP2CB,JUN,RAD9A,PPP2R3A,H2AFX,CDKN1A,CREB1,ATF4,TP53BP1,ATR,PPP2R1B,CHEK2,CDK2
GDP-mannose Biosynthesis	1.15	0.5	GPI,PMM1,MPI
PPARα/RXRα Activation	1.14	0.22	RAP1B,TGFBR1,PRKAB2,NFKBIE,TGFBR3,TGFBR2,JUN,LPL,PRKAA2,TGFB2,MRAS,STAT5B,GOT2,ITGB5,MAP3K14,GNAS,RRAS,ACOX1,RALB,GNAQ,PRKAR2A,PLCG1,IKBKE,PLCL2,IL1R1,ADCY9,ACADL,PLCB4,RRAS2,IRS1,PRKACA,PRKAG2,TGFB3,SLC27A1,NCOR2,RXRA,MAP4K4,ACVR2A,PPARGC1A
Cell Cycle Regulation by BTG Family Proteins	1.13	0.286	RB1,PPP2CB,E2F6,PPP2R3A,BTG2,PPP2R5B,CDK4,PPP2R1B,CCND1,CDK2
Reelin Signaling in Neurons	1.13	0.239	ITGB1,APOE,FYN,PIK3C2A,FGFR1,ITGA6,VLDLR,MAPK12,MAPK8IP1,FRK,ITGB3,APP,APBB1,ITGB2,YES1,PTPN11,GAB1,MAPT,IRS1,PIK3CB,ARHGEF3,FRS2
Protein Ubiquitination Pathway	1.12	0.212	CRYAB,USP20,FBXW7,DNAJC15,DNAJB2,PSMC5,DNAJC28,BAG1,DNAJC16,USP28,UBE2Q1,USP36,DNAJC27,HSPA9,UBE2G2,USP31,PSMB7,UBE2H,PSMA5,HSPA13,DNAJC18,HSPB7,TAP2,UBE2E1,UBE2I,HSPB1,ANAPC2,PSMB10,HLA-A,HSPB8,SMURF1,USO1,USP13,USP42,UBE2V1,USP47,HSPE1,MED20,PSMD13,USP1,HSPD1,UBE2D1,UBE2L6,HSPA2,PSMD8,HSPA12A,DNAJC21,USP4,HSCB,DNAJB11,USP46,CDC34,PSMC3,DNAJB5
CNTF Signaling	1.12	0.25	RAP1B,JAK1,PIK3C2A,RRAS,FGFR1,TYK2,RALB,STAT3,MTOR,RRAS2,PTPN11,GAB1,IRS1,RPS6KB2,MRAS,PIK3CB,FRS2
Ethanol Degradation II	1.1	0.29	ADH7,ALDH1L2,ALDH3A2,ACSS2,ADH1C,PECR,ALDH3A1,ACSL1,ALDH9A1
Angiopoietin Signaling	1.1	0.241	RAP1B,STAT5A,AKT2,PIK3C2A,RRAS,FGFR1,NFKBIE,RALB,IKBKE,NCK1,PAK1,RRAS2,PTPN11,GAB1,IRS1,MRAS,ANGPT4,PIK3CB,STAT5B,FRS2
Diphthamide Biosynthesis	1.09	0.667	DPH5,DPH6
Ascorbate Recycling (Cytosolic)	1.09	0.667	GLRX,GSTO1
Tetrahydrobiopterin Biosynthesis I	1.09	0.667	PTS,SPR
Thiosulfate Disproportionation III (Rhodanese)	1.09	0.667	MOCS3,TST
1D-myo-inositol Hexakisphosphate Biosynthesis V (from Ins(1,3,4)P3)	1.09	0.667	ITPK1,IPPK
Oxidized GTP and dGTP Detoxification	1.09	0.667	RUVBL2,NUDT1
Tetrahydrobiopterin Biosynthesis II	1.09	0.667	PTS,SPR
Glutamate Degradation II	1.09	0.667	GOT1,GOT2
Aspartate Biosynthesis	1.09	0.667	GOT1,GOT2
Glucose and Glucose-1-phosphate Degradation	1.09	0.4	HK1,PGM5,PGM1,PGM2
Pentose Phosphate Pathway	1.09	0.4	PGD,RPE,TKT,G6PD
IL-9 Signaling	1.08	0.267	STAT5A,JAK1,GAB1,PTPN11,PIK3C2A,IRS1,FGFR1,SOCS2,PIK3CB,STAT3,STAT5B,FRS2
Netrin Signaling	1.08	0.25	CACNG1,CACNB1,CHP1,UNC5B,PRKAR2A,CACNB3,NCK1,RAC3,ABLIM1,ENAH,PPP3CB,CACNA2D1,PRKACA,PRKAG2,CACNB2,PPP3CA
Melatonin Signaling	1.07	0.246	Calm1 (includes others),PRKAR2A,GNAQ,PLCG1,PLCL2,GNAI2,BRAF,GNAI3,PLCB4,PRKCI,ARAF,PRKCD,GNAO1,PRKACA,PRKAG2,PRKCE,PRKD3
Relaxin Signaling	1.06	0.221	RAP1B,NFKBIE,GNB5,MPPE1,BRAF,VEGFA,GNB4,GNG11,JUN,PDE3B,GDE1,CREB1,MRAS,TDP2,SMPDL3B,FRS2,AKT2,GNAS,PIK3C2A,FGFR1,GNAQ,PRKAR2A,GNAI2,ADCY9,GNAI3,GAB1,PTPN11,IRS1,GNAO1,PRKACA,PRKAG2,PDE5A,PIK3CB,ELK1
Amyloid Processing	1.06	0.26	AKT2,CAPN6,PRKAR2A,PSEN2,MAPK12,APP,CAPN1,MAPT,PRKAG2,PRKACA,PRKCE,CAPN10,CAPN3
CD28 Signaling in T Helper Cells	1.05	0.226	FYN,Calm1 (includes others),ARPC1B,HLA-A,NFKBIE,ARPC5,CD28,PAK1,JUN,PPP3CB,HLA-DMA,FRS2,PPP3CA,AKT2,PIK3C2A,ITPR2,FGFR1,CHP1,PLCG1,IKBKE,MALT1,ITPR1,MAPK12,GAB1,PTPN11,IRS1,ITPR3,PIK3CB
Role of CHK Proteins in Cell Cycle Checkpoint Control	1.05	0.255	TP53,PPP2R5B,MDC1,PPP2CB,E2F6,PPP2R3A,RAD9A,HUS1,CDKN1A,SLC19A1,ATR,PPP2R1B,CHEK2,CDK2
Cancer Drug Resistance By Drug Efflux	1.05	0.255	TP53,RAP1B,FOXO4,AKT2,RRAS,ABCG2,RALB,BRAF,RRAS2,ARAF,FOXO3,MRAS,PIK3CB,PDK1
T Cell Receptor Signaling	1.05	0.228	RAP1B,VAV2,FYN,Calm1 (includes others),PIK3C2A,RRAS,FGFR1,RALB,PLCG1,IKBKE,MALT1,CD28,SHB,RRAS2,JUN,PPP3CB,GAB1,PTPN11,PAG1,VAV3,IRS1,MRAS,PIK3CB,ELK1,FRS2,PPP3CA
PPAR Signaling	1.05	0.232	RAP1B,PPARG,STAT5A,MAP3K14,RRAS,NFKBIE,RALB,IKBKE,IL1R1,PDGFC,IL18,TRAF2,JUN,RRAS2,PDGFRA,MRAS,NCOR2,STAT5B,RXRA,TNFRSF1B,MAP4K4,PPARGC1A,PDGFRB
Adrenomedullin signaling pathway	1.04	0.214	RAP1B,KCNN4,Calm1 (includes others),PTK2B,PRKG2,ARNT,BRAF,MRAS,CFH,FRS2,PPARG,AKT2,CALCRL,GNAS,PIK3C2A,RRAS,ITPR2,FGFR1,RALB,GNAQ,PRKAR2A,PLCG1,MMP2,PLCL2,ITPR1,MAPK12,ADCY9,IL18,PLCB4,RRAS2,MAX,ARAF,GAB1,PTPN11,IRS1,ITPR3,SHC2,PRKACA,PRKAG2,PIK3CB,ELK1,RXRA
RAR Activation	1.03	0.215	ADH1C,SMARCD2,MNAT1,RARG,PSMC5,VEGFA,JUN,KAT2B,SMARCB1,TGFB2,PRKCE,SORBS3,STAT5B,RDH13,PRKD3,STAT5A,AKT2,DHRS3,RELB,SMAD7,PRKAR2A,SMARCD1,MAPK12,SMARCD3,ADCY9,CSF2RB,BRD7,ADH7,PRKCI,SMARCA2,PRKCD,PRKACA,PRKAG2,TGFB3,PIK3CB,SMARCC1,NCOR2,RDH5,RXRA,PPARGC1A
Nur77 Signaling in T Lymphocytes	1.01	0.255	Calm1 (includes others),HLA-A,HDAC1,CHP1,APAF1,CD28,PPP3CB,HLA-DMA,MEF2D,CYCS,RXRA,PPP3CA,MAP3K2
Notch Signaling	0.998	0.27	DLL1,NOTCH3,MAML3,RBPJ,PSEN2,HES1,JAG1,NUMBL,DTX2,HEY1
Oxidative Ethanol Degradation III	0.998	0.316	ALDH1L2,ALDH3A2,ACSS2,ALDH3A1,ACSL1,ALDH9A1
DNA damage-induced 14-3-3σ Signaling	0.998	0.316	TP53,AKT2,RAD9A,HUS1,ATR,CDK2
Phagosome Formation	0.978	0.223	FN1,INPPL1,RHOB,RHOD,RHOU,PRKCE,FRS2,PRKD3,ITGB1,PIK3C2A,RHOC,MRC2,FGFR1,PLCG1,PLCL2,ITGB2,RHOV,PLCB4,PRKCI,PTPN11,GAB1,SCARA3,RND3,IRS1,PRKCD,PIK3CB,FNBP1
Granzyme B Signaling	0.971	0.333	APAF1,CYCS,CASP8,LMNB1,DFFA
Xenobiotic Metabolism Signaling	0.971	0.206	UGT1A6,GSTA5,MAF,PPP2R5B,GCLC,CHST15,ARNT,CHST2,ALDH3A2,MRAS,CHST11,HS3ST1,PRKD3,FRS2,ALDH3A1,MAP3K2,MAP3K14,MGST1,HDAC4,RRAS,FGFR1,RALB,MAPK12,ALDH9A1,HDAC5,PPP2CB,GAB1,PTPN11,PPP2R3A,PRKCD,IRS1,ALDH18A1,RXRA,MGST3,RAP1B,GSTM5,HMOX1,UST,PRKCE,FMO1,GSTM1,PIK3C2A,NQO1,CYP1B1,GSTO1,ESD,FTL,RRAS2,PRKCI,MGST2,ALDH1L2,PIK3CB,NCOR2,PPP2R1B,PPARGC1A,MAOA
CCR5 Signaling in Macrophages	0.969	0.231	CACNB1,CACNG1,GNAS,Calm1 (includes others),PTK2B,GNB5,PLCG1,CACNB3,MAPK12,GNAI2,GNB4,GNAI3,PRKCI,JUN,GNG11,PRKCD,CACNA2D1,MRAS,PRKCE,CACNB2,PRKD3
Superpathway of Serine and Glycine Biosynthesis I	0.965	0.429	PSPH,SHMT1,SHMT2
Ceramide Biosynthesis	0.965	0.429	SPTLC2,KDSR,SPTSSA
Thioredoxin Pathway	0.965	0.429	TXN,TXNRD1,TXNRD3
Inositol Pyrophosphates Biosynthesis	0.965	0.429	IP6K3,IPPK,PPIP5K2
Oleate Biosynthesis II (Animals)	0.955	0.364	SCD,Scd2,CYB5A,FADS1
Docosahexaenoic Acid (DHA) Signaling	0.953	0.25	BCL2L1,AKT2,PTPN11,GAB1,PIK3C2A,IRS1,FGFR1,SERPINF1,APAF1,PIK3CB,CYCS,FRS2,APP
CDP-diacylglycerol Biosynthesis I	0.947	0.292	AGPAT4,TAMM41,GPAM,LPCAT3,LPCAT1,AGPAT3,CDS2
Gluconeogenesis I	0.947	0.292	ENO1,GPI,PGAM1,ENO3,PGAM2,ME2,ALDOA
PKCθ Signaling in T Lymphocytes	0.944	0.215	RAP1B,FYN,CACNG1,HLA-A,NFKBIE,CACNB3,CD28,JUN,PPP3CB,HLA-DMA,MRAS,CACNB2,FRS2,PPP3CA,MAP3K2,VAV2,MAP3K14,CACNB1,PIK3C2A,RRAS,FGFR1,RALB,CHP1,PLCG1,IKBKE,MALT1,RAC3,RRAS2,GAB1,PTPN11,IRS1,VAV3,CACNA2D1,PIK3CB
CDK5 Signaling	0.934	0.225	RAP1B,ITGB1,LAMA5,GNAS,RRAS,EGR1,PPP2R5B,RALB,PRKAR2A,ITGA6,NGF,MAPK12,ADCY9,PPP2CB,RRAS2,PPP2R3A,MAPT,CAPN1,PRKACA,LAMB1,MRAS,PRKAG2,PPP2R1B
ErbB4 Signaling	0.931	0.234	RAP1B,PIK3C2A,RRAS,FGFR1,RALB,PLCG1,PSEN2,PRKCI,RRAS2,GAB1,PTPN11,IRS1,PRKCD,MRAS,PRKCE,PIK3CB,FRS2,PRKD3
Neurotrophin/TRK Signaling	0.93	0.232	RAP1B,PIK3C2A,SPRY1,RRAS,FGFR1,RALB,PLCG1,NGF,JUN,RRAS2,PTPN11,GAB1,IRS1,SPRY2,CREB1,MRAS,ATF4,PIK3CB,FRS2
Androgen Signaling	0.921	0.218	CACNG1,Calm1 (includes others),GNB5,CACNB3,MNAT1,GTF2A1,CCND1,GNB4,GNG11,JUN,KAT2B,MRAS,PRKCE,CACNB2,PRKD3,POLR2L,CACNB1,GNAS,GNAQ,PRKAR2A,GNAI2,GNAI3,PRKCI,GTF2E1,PRKCD,CACNA2D1,GNAO1,PRKACA,PRKAG2
Glutathione Redox Reactions I	0.909	0.3	GSR,GSTM1,GPX3,MGST1,MGST2,MGST3
Prostate Cancer Signaling	0.899	0.223	RAP1B,TP53,AKT2,PIK3C2A,RRAS,FGFR1,NFKBIE,RALB,CCND1,RB1,MTOR,RRAS2,PTPN11,GAB1,IRS1,CDKN1A,CREB1,MRAS,ATF4,LEF1,PIK3CB,FRS2,CDK2
Sperm Motility	0.877	0.218	TWF1,Calm1 (includes others),PTK2B,PRKG2,MRAS,PRKCE,PRKD3,PTK7,PLA2G16,SLC16A10,GNAS,ITPR2,SLC12A2,PRKAR2A,PLCG1,ITPR1,PLCL2,FRK,PLA2G4A,PLA2G6,PLCB4,PRKCI,PRKCD,ITPR3,PRKACA,PRKAG2
IL-15 Production	0.872	0.28	PRKCI,JAK1,TWF1,PTK2B,TYK2,FRK,PTK7
iNOS Signaling	0.867	0.25	JAK1,Calm1 (includes others),JUN,NFKBIE,TYK2,IFNGR2,CD14,IKBKE,HMGA1,MAPK12,IRAK4
autophagy	0.852	0.237	ULK1,ATG9B,CTSF,CTSV,ATG13,ATG4C,MTOR,ATG9A,CTSH,WIPI1,CTSB,ATG4A,MAP1LC3A,SQSTM1
Pentose Phosphate Pathway (Oxidative Branch)	0.841	0.5	PGD,G6PD
Heme Degradation	0.841	0.5	HMOX1,BLVRB
PRPP Biosynthesis I	0.841	0.5	PRPS2,Prps1l3
Phenylethylamine Degradation I	0.841	0.5	AOC2,ALDH3A2
Methylmalonyl Pathway	0.841	0.5	PCCA,PCCB
Geranylgeranyldiphosphate Biosynthesis	0.841	0.5	FDPS,COX10
Proline Biosynthesis I	0.841	0.5	PYCR3,ALDH18A1
L-cysteine Degradation I	0.841	0.5	GOT1,GOT2
Molybdenum Cofactor Biosynthesis	0.841	0.5	NFS1,MOCS3
Acetate Conversion to Acetyl-CoA	0.841	0.5	ACSS2,ACSL1
Acyl-CoA Hydrolysis	0.84	0.333	GNPAT,ACOT9,ACOT7,THEM4
GPCR-Mediated Nutrient Sensing in Enteroendocrine Cells	0.837	0.218	CACNB1,CACNG1,GNAS,ITPR2,PRKAR2A,GNAQ,PLCG1,CACNB3,PLCL2,ITPR1,GNAI2,ADCY9,GNAI3,PLCB4,PRKCI,GNG11,PRKCD,CACNA2D1,ITPR3,PRKACA,PRKAG2,PRKCE,CACNB2,PRKD3
RANK Signaling in Osteoclasts	0.828	0.22	MAP3K14,AKT2,Calm1 (includes others),PTK2B,PIK3C2A,FGFR1,NFKBIE,CHP1,IKBKE,GSN,MAPK12,TRAF2,JUN,PTPN11,PPP3CB,GAB1,IRS1,PIK3CB,ELK1,FRS2,PPP3CA,MAP3K2
Role of NANOG in Mammalian Embryonic Stem Cell Pluripotency	0.822	0.214	RAP1B,WNT10B,JAK1,FZD1,SMO,MRAS,FZD2,FRS2,BMP1,TP53,AKT2,PIK3C2A,RRAS,WNT9A,FGFR1,RALB,TYK2,DVL1,TCF7L1,STAT3,APC,RRAS2,GAB1,PTPN11,IRS1,FZD5,PIK3CB
IL-1 Signaling	0.82	0.222	MAP3K14,GNAS,NFKBIE,PRKAR2A,GNB5,GNAQ,IKBKE,IL1R1,MAPK12,GNAI2,ADCY9,GNB4,GNAI3,JUN,GNG11,GNAO1,PRKACA,MRAS,PRKAG2,IRAK4
Histidine Degradation III	0.819	0.375	MTHFD1L,MTHFD2,MTHFD1
FcγRIIB Signaling in B Lymphocytes	0.817	0.224	BLNK,RAP1B,CACNG1,CACNB1,PIK3C2A,RRAS,FGFR1,RALB,CACNB3,MAPK12,RRAS2,PTPN11,GAB1,IRS1,CACNA2D1,MRAS,CACNB2,PIK3CB,FRS2
IL-17 Signaling	0.817	0.224	RAP1B,MAP3K14,AKT2,JAK1,PIK3C2A,RRAS,FGFR1,RALB,IL17RC,MAPK12,JUN,RRAS2,PTPN11,GAB1,IRS1,MRAS,PIK3CB,ELK1,FRS2
Basal Cell Carcinoma Signaling	0.81	0.229	TP53,WNT10B,STK36,WNT9A,DVL1,TCF7L1,FZD1,APC,DVL2,SMO,DVL3,LEF1,FZD5,Tcf7,FZD2,BMP1
Estrogen-mediated S-phase Entry	0.803	0.269	MYC,RB1,E2F6,CDKN1A,CDK4,CCND1,CDK2
Phosphatidylglycerol Biosynthesis II (Non-plastidic)	0.803	0.269	AGPAT4,TAMM41,GPAM,LPCAT3,LPCAT1,AGPAT3,CDS2
Antiproliferative Role of Somatostatin Receptor 2	0.778	0.222	RAP1B,PIK3C2A,RRAS,FGFR1,RALB,GNB5,BRAF,GNB4,RRAS2,GNG11,PTPN11,GAB1,IRS1,CDKN1A,MRAS,PIK3CB,ELK1,FRS2
NAD Salvage Pathway II	0.756	0.273	NMNAT1,ACP1,NMRK2,NT5C,Nmnat3,ACPP
Pyrimidine Deoxyribonucleotides De Novo Biosynthesis I	0.756	0.273	TYMS,AK1,DUT,NME5,RRM2,RRM1
Spliceosomal Cycle	0.756	1	U2AF2
S-methyl-5'-thioadenosine Degradation II	0.756	1	MTAP
Acetyl-CoA Biosynthesis III (from Citrate)	0.756	1	ACLY
Glutamine Biosynthesis I	0.756	1	GLUL
Sorbitol Degradation I	0.756	1	SORD
L-cysteine Degradation II	0.756	1	CTH
Asparagine Biosynthesis I	0.756	1	ASNS
Sulfite Oxidation IV	0.756	1	SUOX
D-mannose Degradation	0.756	1	MPI
Alanine Biosynthesis III	0.756	1	NFS1
Glutamate Biosynthesis II	0.756	1	GLUD1
Glutamate Degradation X	0.756	1	GLUD1
Neuropathic Pain Signaling In Dorsal Horn Neurons	0.746	0.212	KCNN4,PIK3C2A,ITPR2,FGFR1,PRKAR2A,PLCG1,PLCL2,ITPR1,GRIA4,PLCB4,PRKCI,PTPN11,GAB1,PRKCD,IRS1,ITPR3,CREB1,PRKACA,PRKAG2,PRKCE,PIK3CB,ELK1,FRS2,PRKD3
Fatty Acid Activation	0.742	0.308	ACSL3,ACSL5,SLC27A1,ACSL1
Urate Biosynthesis/Inosine 5'-phosphate Degradation	0.742	0.308	XDH,IMPDH1,NT5C,ACPP
Cytotoxic T Lymphocyte-mediated Apoptosis of Target Cells	0.739	0.259	FADD,CASP6,HLA-A,APAF1,CYCS,CASP8,DFFA
Superpathway of Cholesterol Biosynthesis	0.739	0.259	FDPS,SQLE,DHCR7,EBP,DHCR24,MSMO1,TM7SF2
Synaptic Long Term Potentiation	0.731	0.21	RAP1B,Calm1 (includes others),GRIA4,PPP3CB,CREB1,MRAS,PRKCE,ATF4,PRKD3,PPP3CA,RRAS,ITPR2,RALB,CHP1,PRKAR2A,GNAQ,PLCG1,ITPR1,PLCL2,PLCB4,PRKCI,RRAS2,PRKCD,ITPR3,PRKACA,PRKAG2
G Protein Signaling Mediated by Tubby	0.73	0.25	GNB4,PLCB4,GNG11,GNAS,MRAS,GNB5,GNAQ,PLCG1
CD40 Signaling	0.704	0.218	MAP3K14,TRAF3,PIK3C2A,FGFR1,NFKBIE,PTGS1,TNFAIP3,IKBKE,STAT3,MAPK12,TRAF2,JUN,PTPN11,GAB1,IRS1,PIK3CB,FRS2
BMP signaling pathway	0.704	0.218	RAP1B,RRAS,RALB,PRKAR2A,SMAD7,GREM1,PITX2,MAPK12,SMURF1,JUN,RRAS2,RUNX2,CREB1,PRKACA,MRAS,PRKAG2,BMP1
Mineralocorticoid Biosynthesis	0.701	0.333	EBP,Cyp2d22,HSD3B7
TR/RXR Activation	0.691	0.213	AKT2,UCP2,PIK3C2A,SLC2A1,FGFR1,DIO2,ATP2A1,ENO1,MTOR,PTPN11,GAB1,SREBF2,PDE3B,IRS1,PIK3CB,NCOR2,RXRA,FRS2,RCAN2,PPARGC1A
Ethanol Degradation IV	0.69	0.261	ALDH1L2,ALDH3A2,ACSS2,ALDH3A1,ACSL1,ALDH9A1
Triacylglycerol Biosynthesis	0.676	0.233	AGPAT4,GPAM,PORCN,LPCAT3,LPIN1,LPCAT1,DGAT2,LPIN2,AGPAT3,ELOVL6
Tetrapyrrole Biosynthesis II	0.671	0.4	UROS,ALAD
Myo-inositol Biosynthesis	0.671	0.4	ISYNA1,IMPA2
2-oxobutanoate Degradation I	0.671	0.4	PCCA,PCCB
Phenylalanine Degradation IV (Mammalian, via Side Chain)	0.657	0.286	ALDH3A2,GOT1,GOT2,MAOA
Synaptic Long Term Depression	0.655	0.2	RAP1B,CACNG1,PPP2R5B,CACNB3,PRKG2,GRIA4,IGF1R,MRAS,PRKCE,CACNB2,PRKD3,PLA2G16,CACNB1,GNAS,RRAS,ITPR2,RALB,GNAQ,PLCG1,PLCL2,ITPR1,GNAI2,GNAI3,PLA2G6,PPP2CB,PLA2G4A,PLCB4,PRKCI,RRAS2,PPP2R3A,PRKCD,CACNA2D1,ITPR3,GNAO1,PPP2R1B
LPS/IL-1 Mediated Inhibition of RXR Function	0.653	0.198	APOE,GSTM5,GSTA5,CHST15,CHST2,JUN,UST,ALDH3A2,ACSL5,XPO1,CHST11,HS3ST1,FMO1,FABP5,TNFRSF1B,ALDH3A1,GSTM1,ACSL3,MGST1,CPT1A,ACOX1,IL1R1,ALDH9A1,GSTO1,IL18,TRAF2,MGST2,ALDH1L2,CPT2,CD14,ALDH18A1,SLC27A1,PLTP,ACOX3,RXRA,ABCC4,ACSL1,MGST3,PPARGC1A,MAOA
Inflammasome pathway	0.638	0.263	IL18,CTSB,CASP8,PANX1,P2RX7
Cardiac β-adrenergic Signaling	0.637	0.203	AKAP8,PPP2R5B,GNB5,ATP2A2,ATP2A1,MPPE1,AKAP2,GNB4,GNG11,PDE3B,GDE1,MRAS,TDP2,SMPDL3B,PKIA,GNAS,PRKAR2A,AKAP6,ADCY9,PPP2CB,AKAP13,PPP2R3A,PRKACA,PRKAG2,PDE5A,PPP2R1B,PKIG
Dopamine-DARPP32 Feedback in cAMP Signaling	0.632	0.2	Calm1 (includes others),PPP2R5B,PRKG2,ATP2A2,ATP2A1,PPP3CB,CREB1,ATF4,PRKCE,PRKD3,PPP3CA,GNAS,ITPR2,CHP1,GNAQ,PRKAR2A,PLCG1,PLCL2,ITPR1,GNAI2,ADCY9,PPP2CB,GNAI3,PLCB4,PRKCI,PPP2R3A,PRKCD,ITPR3,CREM,PRKACA,PRKAG2,PPP2R1B
Noradrenaline and Adrenaline Degradation	0.627	0.235	ADH7,ALDH1L2,ALDH3A2,ADH1C,PECR,ALDH3A1,ALDH9A1,MAOA
GPCR-Mediated Integration of Enteroendocrine Signaling Exemplified by an L Cell	0.626	0.214	GNAS,ITPR2,PRKAR2A,GNAQ,PLCG1,ITPR1,PLCL2,GNAI2,ADCY9,GNAI3,PLCB4,ITPR3,PRKACA,PRKAG2,ADRB2
Role of Wnt/GSK-3β Signaling in the Pathogenesis of Influenza	0.619	0.215	DVL2,WNT10B,WNT9A,DVL1,SMO,DVL3,FZD5,LEF1,FZD1,TCF7L1,FZD2,Tcf7,APC,IFNAR1
Melanocyte Development and Pigmentation Signaling	0.614	0.206	RAP1B,GNAS,PIK3C2A,RRAS,FGFR1,RALB,PRKAR2A,PLCG1,ADCY9,RRAS2,PTPN11,GAB1,IRS1,CREB1,PRKACA,RPS6KB2,MRAS,PRKAG2,ATF4,PIK3CB,FRS2
Calcium Transport I	0.603	0.3	ANXA5,ATP2A2,ATP2A1
NAD Phosphorylation and Dephosphorylation	0.603	0.3	ACP1,NADK,ACPP
Glucocorticoid Biosynthesis	0.603	0.3	EBP,Cyp2d22,HSD3B7
Production of Nitric Oxide and Reactive Oxygen Species in Macrophages	0.603	0.197	RAP1B,APOE,JAK1,NFKBIE,PPP2R5B,JUN,RHOB,RHOD,RHOU,PRKCE,TNFRSF1B,FRS2,PRKD3,MAP3K2,MAP3K14,AKT2,PIK3C2A,RHOC,FGFR1,TYK2,IFNGR2,PLCG1,IKBKE,MAPK12,PPP2CB,RHOV,PRKCI,PTPN11,GAB1,RND3,PPP2R3A,PRKCD,IRS1,PIK3CB,PPP2R1B,FNBP1
Role of PKR in Interferon Induction and Antiviral Response	0.586	0.225	TP53,FADD,TRAF3,TRAF2,NFKBIE,APAF1,IKBKE,CYCS,CASP8
Superpathway of Methionine Degradation	0.581	0.229	PCCA,PRMT3,GOT1,PCCB,CTH,GOT2,SUOX,NSUN4
TNFR2 Signaling	0.577	0.233	MAP3K14,TRAF2,JUN,NFKBIE,TNFAIP3,IKBKE,TNFRSF1B
Pentose Phosphate Pathway (Non-oxidative Branch)	0.546	0.333	RPE,TKT
Zymosterol Biosynthesis	0.546	0.333	MSMO1,TM7SF2
Salvage Pathways of Pyrimidine Deoxyribonucleotides	0.546	0.333	TK2,CDA
Interferon Signaling	0.531	0.226	SOCS1,JAK1,PTPN2,TYK2,IFNGR2,IFNAR1,MED14
CD27 Signaling in Lymphocytes	0.527	0.212	BCL2L1,MAP3K14,TRAF2,JUN,NFKBIE,APAF1,IKBKE,CYCS,CASP8,MAPK12,MAP3K2
Th1 Pathway	0.521	0.197	SOCS1,RUNX3,DLL1,NOTCH3,JAK1,PIK3C2A,HLA-A,FGFR1,IL6R,TYK2,IFNGR2,PSEN2,STAT3,CD28,ITGB2,IL18,PTPN11,GAB1,HLA-DMA,IRS1,IL10RB,PIK3CB,FRS2,IFNAR1
Mismatch Repair in Eukaryotes	0.517	0.25	MSH2,MSH3,SLC19A1,POLD1
Wnt/Ca+ pathway	0.515	0.206	DVL1,PLCG1,FZD1,PLCL2,PLCB4,DVL2,CREB1,SMO,ATF4,DVL3,FZD5,FZD2,PPP3CA
IL-17A Signaling in Airway Cells	0.506	0.203	AKT2,JAK1,PIK3C2A,FGFR1,NFKBIE,TYK2,IL17RC,IKBKE,STAT3,MAPK12,GAB1,PTPN11,IRS1,PIK3CB,FRS2
Role of Osteoblasts, Osteoclasts and Chondrocytes in Rheumatoid Arthritis	0.503	0.189	BGLAP,WNT10B,Calm1 (includes others),PTK2B,MMP14,NFKBIE,FZD1,ITGB3,SMURF1,JUN,PPP3CB,RUNX2,SMO,TNFRSF1B,FZD2,ADAMTS5,FRS2,PPP3CA,BMP1,ITGB1,MAP3K14,AKT2,PIK3C2A,WNT9A,FGFR1,DVL1,CHP1,IKBKE,TCF7L1,IL1R1,GSN,MAPK12,APC,COL1A1,IL18,TRAF2,GAB1,PTPN11,IRS1,LEF1,PIK3CB,FZD5,Tcf7
Leptin Signaling in Obesity	0.5	0.2	AKT2,PIK3C2A,FGFR1,PRKAR2A,PLCG1,PLCL2,STAT3,ADCY9,PLCB4,GAB1,PTPN11,PDE3B,IRS1,PRKACA,PRKAG2,PIK3CB,FRS2
Dolichol and Dolichyl Phosphate Biosynthesis	0.495	0.5	DOLK
Epoxysqualene Biosynthesis	0.495	0.5	SQLE
Alanine Degradation III	0.495	0.5	GPT
Taurine Biosynthesis	0.495	0.5	CSAD
Alanine Biosynthesis II	0.495	0.5	GPT
L-cysteine Degradation III	0.495	0.5	GOT1
Sulfate Activation for Sulfonation	0.495	0.5	PAPSS1
Glycine Degradation (Creatine Biosynthesis)	0.495	0.5	GATM
Cysteine Biosynthesis/Homocysteine Degradation	0.495	0.5	CTH
Threonine Degradation II	0.495	0.5	GCAT
Adenine and Adenosine Salvage I	0.495	0.5	APRT
Putrescine Biosynthesis III	0.495	0.5	ODC1
Formaldehyde Oxidation II (Glutathione-dependent)	0.495	0.5	ESD
Fatty Acid β-oxidation I	0.488	0.219	ACSL3,ECHS1,ACSL5,SLC27A1,IVD,ACSL1,HSD17B8
FGF Signaling	0.486	0.198	AKT2,PIK3C2A,FGFR1,PLCG1,ITPR1,STAT3,MAPK12,MET,FGF21,PTPN11,GAB1,HGF,IRS1,CREB1,ATF4,PIK3CB,FGFRL1,FRS2
Mitotic Roles of Polo-Like Kinase	0.485	0.203	ANAPC2,PLK3,WEE1,PPP2R5B,PRC1,CDC25B,SLK,PPP2CB,PPP2R3A,CAPN1,PLK2,PPP2R1B,CHEK2
Antioxidant Action of Vitamin C	0.483	0.196	PLA2G16,STAT5A,PLD3,SLC2A1,NFKBIE,PLCG1,IKBKE,PLCL2,MAPK12,GLRX,GSTO1,TXNRD1,TXNRD3,PLA2G4A,CSF2RB,PLA2G6,HMOX1,PLCB4,TXN,STAT5B
Serotonin Degradation	0.475	0.203	ADH7,UGT1A6,ALDH1L2,ALDH3A2,ADH1C,PECR,CSGALNACT1,B3GAT3,ALDH3A1,B4GAT1,ALDH9A1,MAOA
Hepatic Cholestasis	0.469	0.191	SLC4A2,NFKBIE,HSD3B7,JUN,PPRC1,TGFB2,PRKCE,TNFRSF1B,PRKD3,MAP4K2,MAP3K14,TJP2,PRKAR2A,IKBKE,IL1R1,MAPK12,ADCY9,IL18,TRAF2,PRKCI,SLCO3A1,PRKCD,PRKACA,PRKAG2,TGFB3,CD14,RXRA,TIRAP,IRAK4
Neuroinflammation Signaling Pathway	0.466	0.186	TRAF3,JAK1,TGFBR1,TGFBR3,TGFBR2,ATF4,FRS2,AKT2,CD200,FGFR1,IL6R,TYK2,MAPK12,PLA2G6,IL18,GAB1,PTPN11,IRS1,MAPT,TGFB3,GLUL,CX3CL1,GDNF,HLA-A,PSEN2,MFGE8,FZD1,NGF,HMOX1,JUN,PPP3CB,TICAM1,HLA-DMA,IL34,CREB1,TGFB2,CASP8,PPP3CA,VCAM1,PIK3C2A,CHP1,IFNGR2,PLCG1,IKBKE,IL1R1,APP,PLA2G4A,RIPK1,PIK3CB,TIRAP,ACVR2A,IRAK4,P2RX7
Purine Nucleotides Degradation II (Aerobic)	0.459	0.235	XDH,IMPDH1,NT5C,ACPP
Histamine Degradation	0.459	0.235	ALDH1L2,ALDH3A2,ALDH3A1,ALDH9A1
Acute Phase Response Signaling	0.452	0.189	RAP1B,SOCS1,FN1,NFKBIE,SOCS6,CP,HMOX1,MTOR,JUN,MRAS,SOCS2,TNFRSF1B,MAP3K14,AKT2,RRAS,RALB,IL6R,SERPINF1,IKBKE,STAT3,IL1R1,MAPK12,IL18,FTL,TRAF2,RIPK1,RRAS2,PTPN11,PIK3CB,SOCS7,ELK1
Guanosine Nucleotides Degradation III	0.451	0.25	XDH,NT5C,ACPP
Glycoaminoglycan-protein Linkage Region Biosynthesis	0.45	0.286	B3GALT6,B3GAT3
Aspartate Degradation II	0.45	0.286	GOT1,GOT2
Circadian Rhythm Signaling	0.449	0.212	PER3,PER1,CRY2,BHLHE40,CREB1,ATF4,PER2
Role of RIG1-like Receptors in Antiviral Innate Immunity	0.449	0.212	FADD,TRAF3,TRAF2,RIPK1,NFKBIE,IKBKE,CASP8
Nucleotide Excision Repair Pathway	0.449	0.212	ERCC4,RPA3,ERCC6,XPC,MNAT1,POLR2L,RPA2
PXR/RXR Activation	0.446	0.2	SCD,GSTM1,AKT2,CPT1A,PCK2,ALDH3A2,FOXO3,PRKAR2A,PRKACA,PRKAG2,RXRA,PPARGC1A
Antigen Presentation Pathway	0.436	0.214	HLA-G,HLA-DMA,HLA-A,TAPBP,TAP2,HLA-E
Sonic Hedgehog Signaling	0.436	0.214	DYRK1B,STK36,PRKAR2A,PRKACA,PRKAG2,SMO
April Mediated Signaling	0.426	0.205	MAP3K14,TRAF3,TRAF2,JUN,NFKBIE,IKBKE,ELK1,MAPK12
Tryptophan Degradation X (Mammalian, via Tryptamine)	0.423	0.217	ALDH1L2,ALDH3A2,ALDH3A1,ALDH9A1,MAOA
Cell Cycle: G2/M DNA Damage Checkpoint Regulation	0.422	0.2	CDC25B,TP53,YWHAQ,KAT2B,WEE1,CDKN1A,CKS1B,ATR,HIPK2,CHEK2
iCOS-iCOSL Signaling in T Helper Cells	0.42	0.19	GAB2,AKT2,Calm1 (includes others),PIK3C2A,HLA-A,ITPR2,FGFR1,NFKBIE,CHP1,PLCG1,IKBKE,ITPR1,CD28,PTPN11,PPP3CB,GAB1,HLA-DMA,IRS1,ITPR3,PIK3CB,FRS2,PPP3CA
Systemic Lupus Erythematosus Signaling	0.408	0.185	RAP1B,HLA-A,TXNL4A,HLA-G,BDKRB2,CD28,SNRPN,MTOR,JUN,MRAS,SNRPD1,LSM3,SNRPD3,FRS2,AKT2,PIK3C2A,RRAS,SNRPF,FGFR1,RALB,IL6R,PLCG1,IL18,PRPF18,RRAS2,LSM8,GAB1,PTPN11,IRS1,CREM,LSM1,SF3B4,PIK3CB,LSM7,HLA-E
Role of Oct4 in Mammalian Embryonic Stem Cell Pluripotency	0.408	0.2	TP53,CASP6,RB1,AQR,PHB,PPP1R8,CCNF,MEF2A,SH3GLB1
T Helper Cell Differentiation	0.406	0.194	TGFBR2,CD28,IL4R,IL18,TGFBR1,HLA-DMA,HLA-A,IL6R,IL10RB,IFNGR2,STAT3,BCL6,TNFRSF1B
Role of PI3K/AKT Signaling in the Pathogenesis of Influenza	0.406	0.194	GNAI2,GNAI3,AKT2,PTPN11,GAB1,PIK3C2A,NFKBIE,IRS1,FGFR1,ZNF346,PIK3CB,FRS2,IFNAR1
tRNA Splicing	0.394	0.2	TSEN15,PDE3B,GDE1,PDE5A,TDP2,TRPT1,SMPDL3B,MPPE1
Androgen Biosynthesis	0.392	0.231	EBP,SRD5A3,HSD3B7
Sucrose Degradation V (Mammalian)	0.374	0.25	ALDOA,GALM
Phosphatidylethanolamine Biosynthesis II	0.374	0.25	CEPT1,CHKA
Activation of IRF by Cytosolic Pattern Recognition Receptors	0.367	0.192	FADD,TRAF3,RIPK1,JUN,NFKBIE,SIKE1,IKBKE,ADAR,MAPK12,IFNAR1
MIF Regulation of Innate Immunity	0.364	0.195	TP53,PLA2G4A,PLA2G6,MIF,JUN,NFKBIE,CD14,MAPK12
B Cell Activating Factor Signaling	0.364	0.195	MAP3K14,TRAF3,TRAF2,JUN,NFKBIE,IKBKE,ELK1,MAPK12
L-carnitine Biosynthesis	0.357	0.333	ALDH9A1
5-aminoimidazole Ribonucleotide Biosynthesis I	0.357	0.333	PFAS
Thyronamine and Iodothyronamine Metabolism	0.357	0.333	DIO2
D-glucuronate Degradation I	0.357	0.333	CRYL1
Inosine-5'-phosphate Biosynthesis II	0.357	0.333	ATIC
Hypusine Biosynthesis	0.357	0.333	DHPS
4-hydroxyproline Degradation I	0.357	0.333	GOT2
Thyroid Hormone Metabolism I (via Deiodination)	0.357	0.333	DIO2
Isoleucine Degradation I	0.341	0.214	BCAT1,ECHS1,BCAT2
Adenosine Nucleotides Degradation II	0.341	0.214	XDH,NT5C,ACPP
4-1BB Signaling in T Lymphocytes	0.33	0.194	MAP3K14,TRAF2,JUN,NFKBIE,IKBKE,MAPK12
Lipid Antigen Presentation by CD1	0.323	0.2	CD1D,ARF6,AP2A1,PSAP
Fatty Acid α-oxidation	0.323	0.2	ALDH1L2,ALDH3A2,ALDH3A1,ALDH9A1
Endoplasmic Reticulum Stress Pathway	0.323	0.2	TRAF2,DDIT3,ERN1,ATF4
IL-17A Signaling in Fibroblasts	0.301	0.188	JUN,NFKBIE,CEBPD,IL17RC,IKBKE,MAPK12
Granzyme A Signaling	0.297	0.2	HIST1H1C,H1FX,HMGB2
tRNA Charging	0.293	0.184	WARS,YARS,LARS2,TARS,AARS,SARS,NARS2
D-myo-inositol (1,4,5)-Trisphosphate Biosynthesis	0.28	0.185	PLCB4,PLCG1,PIP4K2B,PI4K2B,PI4KA
Acetone Degradation I (to Methylglyoxal)	0.28	0.185	CYP2U1,ZADH2,DHRS11,CYP2J2,CYP1B1
Estrogen Receptor Signaling	0.272	0.176	RAP1B,MED20,RRAS,TAF5L,RALB,PHB2,MED30,MNAT1,GTF2A1,MED14,KAT2B,RRAS2,H3F3A/H3F3B,CDK8,PCK2,RUNX2,GTF2E1,CTBP2,MRAS,NCOR2,POLR2L,PPARGC1A,TAF15
Arsenate Detoxification I (Glutaredoxin)	0.269	0.25	GSTO1
Pyruvate Fermentation to Lactate	0.269	0.25	LDHA
Eumelanin Biosynthesis	0.269	0.25	MIF
α-tocopherol Degradation	0.269	0.25	CYP4F3
Glycerol-3-phosphate Shuttle	0.269	0.25	GPD1L
Melatonin Degradation II	0.269	0.25	MAOA
Trans, trans-farnesyl Diphosphate Biosynthesis	0.269	0.25	FDPS
Lactose Degradation III	0.269	0.25	PSAP
Pyrimidine Ribonucleotides De Novo Biosynthesis	0.264	0.178	SLC25A42,AK1,NME5,NUDT16,ANXA1,ENTPD6,CAD,UMPS
Ketogenesis	0.263	0.2	BDH2,HMGCL
Glycine Betaine Degradation	0.263	0.2	SHMT1,SHMT2
Glutaryl-CoA Degradation	0.259	0.188	HACD1,HACD2,HSD17B8
IL-17A Signaling in Gastric Cells	0.255	0.182	JUN,IL17RC,MAPK12,EGFR
Role of Lipids/Lipid Rafts in the Pathogenesis of Influenza	0.222	0.182	FDPS,IFNAR1
NAD Biosynthesis from 2-amino-3-carboxymuconate Semialdehyde	0.208	0.2	NMNAT1
Arginine Biosynthesis IV	0.208	0.2	GLUD1
Trehalose Degradation II (Trehalase)	0.208	0.2	HK1
Creatine-phosphate Biosynthesis	0.208	0.2	MAP4K4
Serine Biosynthesis	0.208	0.2	PSPH
Purine Ribonucleosides Degradation to Ribose-1-phosphate	0.208	0.2	PGM2
Tyrosine Degradation I	0.208	0.2	FAH
Coagulation System	0	0.171	BDKRB2,PLAUR,PLAU,THBD,F3,PLAT
LXR/RXR Activation	0	0.127	SCD,APOE,ECHS1,SERPINF1,IL1R1,IL18,MYLIP,LPL,CD14,PLTP,NCOR2,TNFRSF1B,RXRA,PON3
Mitochondrial Dysfunction	0	0.164	COX6A1,PRDX5,XDH,COX10,COX8A,TRAK1,PSEN2,DHODH,COX6A2,PDHA1,HTRA2,CASP8,NDUFS4,NDUFAF1,CPT1A,UCP2,NDUFV3,MAPK12,COX7A1,APP,GSR,NDUFB7,CYCS,CYB5A,MAOA,PINK1
FXR/RXR Activation	0	0.13	PPARG,APOE,AKT2,SLC4A2,SERPINF1,VLDLR,MAPK12,MTTP,IL18,PCK2,LPL,PLTP,RXRA,PON3,PPARGC1A
IL-12 Signaling and Production in Macrophages	0	0.172	PPARG,APOE,AKT2,PIK3C2A,FGFR1,MAF,IKBKE,MAPK12,IL18,PRKCI,JUN,PTPN11,GAB1,PRKCD,IRS1,TGFB3,TGFB2,PRKCE,PIK3CB,RXRA,FRS2,PRKD3
Role of Pattern Recognition Receptors in Recognition of Bacteria and Viruses	0	0.133	PIK3C2A,FGFR1,MAPK12,IL18,PRKCI,PTPN11,GAB1,TICAM1,PRKCD,IRS1,CREB1,TGFB3,TGFB2,PRKCE,PIK3CB,FRS2,PRKD3
TREM1 Signaling	0	0.101	ITGB1,STAT5A,AKT2,IL18,PLCG1,STAT3,STAT5B
Airway Pathology in Chronic Obstructive Pulmonary Disease	0	0.143	MMP2
Role of Cytokines in Mediating Communication between Immune Cells	0	0.027	IL18
Dendritic Cell Maturation	0	0.165	HLA-A,NFKBIE,COL1A2,CD1D,DDR2,HLA-DMA,CREB1,ATF4,COL11A2,TNFRSF1B,FRS2,MAP3K14,AKT2,PIK3C2A,RELB,FGFR1,PLCG1,IKBKE,PLCL2,MAPK12,COL1A1,PLCB4,IL18,GAB1,PTPN11,IRS1,PIK3CB,IFNAR1
Cardiomyocyte Differentiation via BMP Receptors	0	0.0588	MYL2
DNA Methylation and Transcriptional Repression Signaling	0	0.147	CHD3,H3F3A/H3F3B,CHD4,HDAC1,RBBP4
Primary Immunodeficiency Signaling	0	0.075	BLNK,DCLRE1C,TAP2
Allograft Rejection Signaling	0	0.107	HLA-G,CD28,H2-T9,HLA-DMA,HLA-A,HLA-E
Autoimmune Thyroid Disease Signaling	0	0.135	HLA-G,CD28,HLA-DMA,HLA-A,HLA-E
Graft-versus-Host Disease Signaling	0	0.158	HLA-G,CD28,IL18,HLA-DMA,HLA-A,HLA-E
Cleavage and Polyadenylation of Pre-mRNA	0	0.167	CSTF2,WDR33
Communication between Innate and Adaptive Immune Cells	0	0.0685	HLA-G,CD28,IL18,HLA-A,HLA-E
Crosstalk between Dendritic Cells and Natural Killer Cells	0	0.159	HLA-G,CSF2RB,CD28,IL18,TLN2,ACTA2,HLA-A,TNFRSF1B,ACTC1,ACTA1,HLA-E
Altered T Cell and B Cell Signaling in Rheumatoid Arthritis	0	0.0854	MAP3K14,CD28,TRAF3,IL18,HLA-DMA,HLA-A,RELB
Atherosclerosis Signaling	0	0.14	PLA2G16,APOE,VCAM1,CXCR4,PDGFC,F3,TNFRSF12A,COL1A2,PLA2G4A,ITGB2,COL1A1,PLA2G6,IL18,TNFSF12,LPL,COL11A2
B Cell Development	0	0.0714	HLA-DMA,HLA-A
Neuroprotective Role of THOP1 in Alzheimer's Disease	0	0.131	HLA-A,PRKAR2A,APP,HLA-G,NFYA,PRSS23,MAPT,CREB1,PRKACA,PRKAG2,HTRA2,ECE1,LONP1,HLA-E
Role of MAPK Signaling in the Pathogenesis of Influenza	0	0.147	RAP1B,PLA2G16,PLA2G4A,PLA2G6,AKT2,RRAS2,RRAS,RALB,MRAS,MAPK12,RABGEF1
Role of Hypercytokinemia/hyperchemokinemia in the Pathogenesis of Influenza	0	0.0357	IL18
MSP-RON Signaling Pathway	0	0.174	ITGB2,CSF2RB,GAB1,ACTA2,PTPN11,PIK3C2A,IRS1,FGFR1,PIK3CB,ACTC1,FRS2,ACTA1
OX40 Signaling Pathway	0	0.167	HLA-G,BCL2L1,H2-T9,TRAF3,TRAF2,JUN,HLA-DMA,HLA-A,NFKBIE,MAPK12,HLA-E
Extrinsic Prothrombin Activation Pathway	0	0.125	THBD,F3
MIF-mediated Glucocorticoid Regulation	0	0.152	PLA2G4A,PLA2G6,MIF,NFKBIE,CD14
Intrinsic Prothrombin Activation Pathway	0	0.103	COL1A2,COL1A1,COL11A2,THBD
Assembly of RNA Polymerase II Complex	0	0.125	TAF5L,GTF2E1,GTF2A1,MNAT1,POLR2L,TAF15
DNA Double-Strand Break Repair by Homologous Recombination	0	0.0714	RAD52
Assembly of RNA Polymerase III Complex	0	0.0833	GTF3A
DNA Double-Strand Break Repair by Non-Homologous End Joining	0	0.143	DCLRE1C,XRCC5
Role of IL-17A in Arthritis	0	0.154	GAB1,PTPN11,PIK3C2A,NFKBIE,IRS1,FGFR1,IL17RC,PIK3CB,MAPK12,FRS2
Role of IL-17A in Psoriasis	0	0.125	IL17RC
Role of IL-17F in Allergic Inflammatory Airway Diseases	0	0.0732	CREB1,IL17RC,ATF4
Telomere Extension by Telomerase	0	0.143	PINX1,XRCC5
Transcriptional Regulatory Network in Embryonic Stem Cells	0	0.0769	H3F3A/H3F3B,KAT6A,TCF7L1,STAT3
Heparan Sulfate Biosynthesis	0	0.149	PNPLA7,CHST2,B3GALT6,UST,CHST11,DTD2,HS3ST1,B3GAT3,GLCE,AARS,CHST15
Bupropion Degradation	0	0.136	CYP2U1,CYP2J2,CYP1B1
Retinoate Biosynthesis I	0	0.156	ADH7,DHRS3,ADH1C,RDH5,RDH13
Thyroid Hormone Metabolism II (via Conjugation and/or Degradation)	0	0.161	UGT1A6,CSGALNACT1,B3GAT3,DIO2,B4GAT1
NAD biosynthesis II (from tryptophan)	0	0.0769	NMNAT1
Nicotine Degradation III	0	0.174	ADH7,UGT1A6,CYP2U1,CYP2J2,CSGALNACT1,B3GAT3,CYP1B1,B4GAT1
Prostanoid Biosynthesis	0	0.111	PTGS1
Dopamine Degradation	0	0.167	ALDH1L2,ALDH3A2,ALDH3A1,ALDH9A1,MAOA
Heparan Sulfate Biosynthesis (Late Stages)	0	0.134	PNPLA7,CHST2,UST,CHST11,DTD2,HS3ST1,GLCE,AARS,CHST15
Proline Biosynthesis II (from Arginine)	0	0.167	PYCR3
Ubiquinol-10 Biosynthesis (Eukaryotic)	0	0.105	MICAL1,MICAL3
Superpathway of Citrulline Metabolism	0	0.0667	ALDH18A1
The Visual Cycle	0	0.158	DHRS3,RDH5,RDH13
Chondroitin and Dermatan Biosynthesis	0	0.167	CSGALNACT1
Melatonin Degradation I	0	0.14	UGT1A6,CYP2U1,CYP2J2,CSGALNACT1,B3GAT3,CYP1B1,B4GAT1
Triacylglycerol Degradation	0	0.16	ABHD12,PNPLA7,DDHD2,LPL,ABHD2,DAGLA,DTD2,AARS
Phospholipases	0	0.138	PLA2G16,PLA2G4A,HMOX1,PLA2G6,PLCB4,PLD3,PLCG1,PLCL2
Estrogen Biosynthesis	0	0.162	CYP2U1,HSD17B11,DHRS11,CYP2J2,CYP1B1,HSD17B8
Arginine Degradation VI (Arginase 2 Pathway)	0	0.167	PYCR3
Leukotriene Biosynthesis	0	0.167	MGST2,MGST3
Chondroitin Sulfate Biosynthesis	0	0.16	CHST2,B3GALT6,UST,CHST11,HS3ST1,CSGALNACT1,B3GAT3,CHST15
Dermatan Sulfate Biosynthesis	0	0.173	CHST2,B3GALT6,UST,CHST11,HS3ST1,DSEL,CSGALNACT1,B3GAT3,CHST15
Acetyl-CoA Biosynthesis I (Pyruvate Dehydrogenase Complex)	0	0.167	PDHA1
Dermatan Sulfate Biosynthesis (Late Stages)	0	0.154	CHST2,UST,CHST11,HS3ST1,DSEL,CHST15
Nicotine Degradation II	0	0.164	ADH7,UGT1A6,CYP2U1,FMO1,CYP2J2,CSGALNACT1,B3GAT3,CYP1B1,B4GAT1
Citrulline Biosynthesis	0	0.111	ALDH18A1
Selenocysteine Biosynthesis II (Archaea and Eukaryotes)	0	0.167	SARS
Valine Degradation I	0	0.167	BCAT1,ECHS1,BCAT2
Superoxide Radicals Degradation	0	0.125	NQO1
TCA Cycle II (Eukaryotic)	0	0.0435	IDH3A
UDP-N-acetyl-D-glucosamine Biosynthesis II	0	0.167	GNPNAT1
Bile Acid Biosynthesis, Neutral Pathway	0	0.167	AMACR,HSD3B7
Retinol Biosynthesis	0	0.132	DDHD2,DHRS3,LPL,RDH13,ESD
Tryptophan Degradation III (Eukaryotic)	0	0.12	HACD1,HACD2,HSD17B8
Ketolysis	0	0.125	BDH2
Pyrimidine Ribonucleotides Interconversion	0	0.14	SLC25A42,AK1,NME5,NUDT16,ANXA1,ENTPD6
Methylglyoxal Degradation III	0	0.111	ZADH2,DHRS11
Dolichyl-diphosphooligosaccharide Biosynthesis	0	0.1	ALG8
Chondroitin Sulfate Biosynthesis (Late Stages)	0	0.143	CHST2,UST,CHST11,HS3ST1,CSGALNACT1,CHST15
Superpathway of Melatonin Degradation	0	0.145	UGT1A6,CYP2U1,CYP2J2,CSGALNACT1,B3GAT3,CYP1B1,B4GAT1,MAOA
Histidine Degradation VI	0	0.133	MICAL1,MICAL3
Pregnenolone Biosynthesis	0	0.167	MICAL1,MICAL3
Sphingomyelin Metabolism	0	0.125	SMPD2
Methionine Degradation I (to Homocysteine)	0	0.1	PRMT3,NSUN4
Superpathway of Geranylgeranyldiphosphate Biosynthesis I (via Mevalonate)	0	0.125	FDPS,COX10
Gαi Signaling	0	0.149	RAP1B,GNAS,RRAS,RALB,PRKAR2A,GNB5,STAT3,GNAI2,ADCY9,GNB4,GNAI3,RRAS2,GNG11,S1PR1,PRKACA,MRAS,PRKAG2,RALGDS
Gαs Signaling	0	0.168	GNAS,ADD2,PRKAR2A,GNB5,BRAF,ADCY9,GNB4,GNG11,ADD3,CREB1,PRKACA,MRAS,PRKAG2,ATF4,ADORA2B,ELK1,PTGER4,ADRB2
Cysteine Biosynthesis III (mammalia)	0	0.136	PRMT3,CTH,NSUN4
Agranulocyte Adhesion and Diapedesis	0	0.169	FN1,MYL2,MMP14,MMP16,MYL6B,Ccl8,Ccl2,MYL4,MMP11,ACTC1,ACTA1,ITGB1,VCAM1,MMP28,CXCR4,ITGA6,MMP2,IL1R1,MYL1,GNAI2,GNAI3,ITGB2,IL18,ACTA2,MYH3,CD34,CX3CL1,Ccl7
Granulocyte Adhesion and Diapedesis	0	0.147	ITGB1,VCAM1,MMP28,CXCR4,MMP14,MMP16,ITGA6,MMP2,SDC3,IL1R1,ITGB3,GNAI2,ITGB2,GNAI3,IL18,Ccl8,SDC2,Ccl2,MMP11,TNFRSF1B,CX3CL1,Ccl7,HSPB1
Oxidative Phosphorylation	0	0.101	COX6A1,COX10,COX8A,NDUFV3,NDUFB7,CYCS,CYB5A,COX7A1,NDUFS4,COX6A2
BER pathway	0	0.167	PNKP,POLB
HIPPO signaling	0	0.165	TJP2,WWTR1,PPP2R5B,LATS2,DLG3,YWHAQ,PPP2CB,TEAD1,PPP2R3A,SCRIB,TEAD3,MOB1A,PPP2R1B,AMOT
Parkinson's Signaling	0	0.125	CYCS,MAPK12
Toll-like Receptor Signaling	0	0.167	MAP3K14,IL18,JUN,TICAM1,TRAF4,CD14,TNFAIP3,ELK1,TIRAP,MAPK12,MAP4K4,IRAK4
GABA Receptor Signaling	0	0.143	CACNG1,KCNN4,CACNB1,AP2A1,GNAS,CACNB3,ALDH9A1,DNM1,ADCY9,NSF,CACNA2D1,MRAS,CACNB2
Serotonin Receptor Signaling	0	0.103	ADCY9,PTS,SPR,MAOA
Phototransduction Pathway	0	0.102	PRKAR2A,PRKACA,PRKAG2,GNB5,OPN3
Dopamine Receptor Signaling	0	0.162	ADCY9,PPP2CB,PPP2R3A,PTS,PPP2R5B,PRKAR2A,PRKACA,PRKAG2,NCS1,SPR,PPP2R1B,MAOA
cAMP-mediated signaling	0	0.151	Calm1 (includes others),AKAP8,MPPE1,BRAF,AKAP2,PPP3CB,PDE3B,GDE1,CREB1,ATF4,TDP2,SMPDL3B,ADORA2B,PKIA,PTGER4,PPP3CA,ADRB2,GNAS,PRKAR2A,AKAP6,STAT3,GNAI2,ADCY9,GNAI3,AKAP13,DUSP9,CREM,GNAO1,PRKACA,S1PR1,PDE5A,DUSP4,PKIG
Glutamate Receptor Signaling	0	0.143	SLC1A4,GNG11,GRIK5,Calm1 (includes others),GLUL,HOMER1,SLC38A1,GRIA4
G-Protein Coupled Receptor Signaling	0	0.159	RAP1B,FYN,PTK2B,NFKBIE,MPPE1,BRAF,PDE3B,GDE1,CREB1,MRAS,ATF4,PRKCE,TDP2,SMPDL3B,ADORA2B,FRS2,PTGER4,ADRB2,AKT2,GNAS,PIK3C2A,RRAS,FGFR1,RALB,PRKAR2A,GNAQ,IKBKE,STAT3,GNAI2,ADCY9,GNAI3,PLCB4,DUSP9,RRAS2,GAB1,PTPN11,IRS1,GNAO1,PRKACA,S1PR1,PRKAG2,PDE5A,PIK3CB,DUSP4
Gustation Pathway	0	0.157	CACNG1,CACNB1,ITPR2,PRKAR2A,CACNB3,ITPR1,PANX1,MPPE1,ADCY9,GNG11,PDE3B,GDE1,CACNA2D1,ITPR3,PRKACA,PRKAG2,TDP2,PDE5A,P2RX6,CACNB2,SMPDL3B,P2RX7
Complement System	0	0.0909	ITGB2,CFH,C1QBP
Eicosanoid Signaling	0	0.0938	PLA2G16,PLA2G4A,PLA2G6,PTGS1,PTGER4,PTGER1
