# Supplementary material for: SWELL1 regulates skeletal muscle cell size, intracellular signaling, adiposity and glucose metabolism
Source: eLife. 2020 Sep 15;9:e58941. doi: 10.7554/eLife.58941 (PMC7541086; doi:10.7554/eLife.58941)
Supplement: Supplementary file 4. [file elife-58941-supp4.xlsx]

## Sheet: Sheet1
Supplementary Table 4. Primers used for qRT-PCR of muscle differentiation gene
Gene	Sequence 5’3’
PGC1a	AGCCGTGACCA CTGACAACGAG and
	GCTGCATGGTTCTGAGTGCTAAG
mIGF	GCGATGGGGAAAA TCAGCAG and
	CGCCAGGTAGAAGAGGTGTG
MyoHCI	TCCTGCTGTTTCCTTACTTGCT and
	GTGATAGAGAGGTAAGCCCAGG
MyoHC IIa	CTCGTCCTGCTTTAAAAAGCTCC and
	TCGATTCGCTCCTTTTCGGAC
MyoHC IIb	GTCCTTCCTCAAACCCTTAAAGT and
	CATCTCAGCGTCGGAACTCA
GAPDH	TGCACCACCAACTGCTTAG and
	GATGCAGGGATGATGTTC
